# Supplementary material
Source: PubMed Central journal article supplement (PMC8190871)
Supplement: NIHMS1707867-supplement-supinfo.pdf [file NIHMS1707867-supplement-supinfo.pdf]

**Table of Contents:**

|      |                                                               |            |
|------|---------------------------------------------------------------|------------|
| I.   | General Information                                           | <b>S02</b> |
| II.  | Spectroscopy, Spectrometry and Data Collection                | <b>S02</b> |
| III. | Summaries of Prior Syntheses                                  | <b>S03</b> |
| IV.  | Experimental Procedures and Characterization of intermediates | <b>S10</b> |
| V.   | Single Crystal Diffraction Data for Compound <b>4</b>         | <b>S61</b> |
| VI.  | References                                                    | <b>S63</b> |

## I. General Information

All reactions were carried out under inert gas atmosphere (nitrogen or argon) unless otherwise indicated. Re-sealable pressure tubes (13x100 mm) were purchased from Fischer Scientific (catalog number 14-959-35C) and were flame dried followed by cooling in a desiccator or under a stream of inert gas prior to use. All commercial reagents and anhydrous solvents were used as received from vendors (Fischer Scientific, Sigma Aldrich, TCI America, Combi Blocks and Enamine) without further purification. The used Iridium catalyst (*S*)-Ir-SEGPHOS and (*S*)-Ir-tol-BINAP was prepared according to literature known procedures.<sup>1</sup> Cs<sub>2</sub>CO<sub>3</sub> was used as received from Rockwell Lithium. Preparative column chromatography employing Silicycle silica gel (40-63 μm) was performed according to the method of Still<sup>2</sup> or on a Teledyne Isco Combiflash Rf utilizing Silicycle HP columns using a mobile phase composed of either heptane/isopropyl acetate or dichloromethane/methanol. Reactions were monitored by a Shimadzu LCMS/UV system with LC-30AD solvent pump, 2020 MS, Sil-30AC autosampler, SPD-M30A UV detector, CTO-20A column oven, using a 2-98% acetonitrile/0.1% formic acid (or 0.001% ammonia) gradient over 2.5 minutes. Analytical thin-layer chromatography (TLC) was carried out using 0.25 mm commercial silica gel plates (Dynamic Absorbents F). Visualization was accomplished with UV light followed by dipping in CAM, p- Anisaldehyde (PAA), or KMnO<sub>4</sub> stain solution followed by heating.

### I. Spectroscopy, Spectrometry and Data Collection

Infrared spectra were recorded on a Perkin-Elmer 1600 spectrometer using a diamond ATR unit. High-resolution mass spectra (HRMS) were obtained on a Karatos MS9 and are reported as m/z (relative intensity). Accurate masses are reported for the molecular ion (M+H, M+Na), or a suitable fragment ion. Nuclear magnetic resonance (1H, 13C, 19F NMR) spectra were recorded with a Bruker BioSpin GmbH, Varian Gemini (400 MHz) or Varian INOVA (500 MHz) spectrometer equipped with a Bruker cryoprobe. The chemical shifts are given as parts per million (ppm) and were referenced to the residual solvent signal (DMSO: δH = 2.50 ppm, δC = 39.52 ppm, CDCl<sub>3</sub>: δH = 7.26 ppm, δC = 77.16 ppm). Specific optical rotations were recorded on an Atago AP-300 automatic polarimeter at the sodium line (589 nm) in either CHCl<sub>3</sub> or MeOH. Solution concentrations are given in the units of 10<sup>-2</sup> g mL<sup>-1</sup>.

## I. Summaries of Prior Syntheses

### A. Kotake et al., Pladienolide B, *Angew. Chem. Int. Ed.*, 2007, 46, 4350.

#### Fragment 1

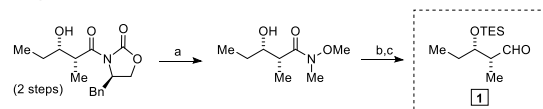

Reagents: (a) *N,O*-dimethylhydroxylamine hydrochloride, Me<sub>3</sub>Al, CH<sub>2</sub>Cl<sub>2</sub>; (b) TBSOTf, 2,6-lutidine, CH<sub>2</sub>Cl<sub>2</sub>; (c) DIBAL, toluene.

#### Fragment 2

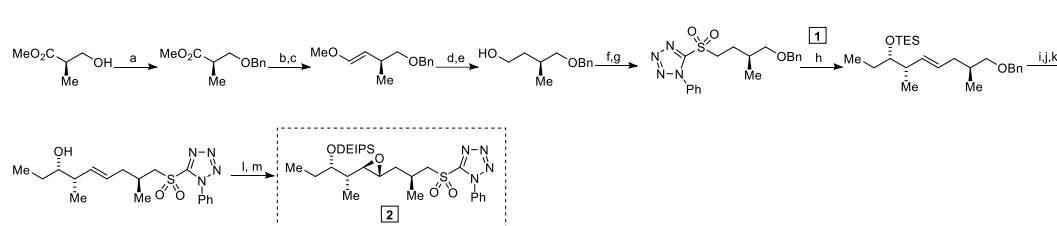

Reagents: (a) benzyl 2,2,2-trichloroacetimidate, trifluoromethanesulfonic acid, CH<sub>2</sub>Cl<sub>2</sub>-cyclohexane; (b) DIBAL, toluene, MeOH; (c) (methoxymethyl)triphenylphosphonium chloride, *tert*-BuOK, THF; (d) formic acid, H<sub>2</sub>O; (e) NaBH<sub>4</sub>, MeOH; (f) 5-mercapto-1-phenyltetrazole, Ph<sub>3</sub>P, DIAD, THF; (g) (NH<sub>4</sub>)<sub>6</sub>Mo<sub>7</sub>O<sub>24</sub>·4H<sub>2</sub>O, H<sub>2</sub>O<sub>2</sub>, EtOH; (h) KHMDS, THF; (i) Li<sup>+</sup>, 4,4'-*tert*-butylbiphenyl, THF; (j) 5-mercapto-1-phenyltetrazole, Ph<sub>3</sub>P, DIAD, THF; (k) MoO<sub>7</sub>(NH<sub>4</sub>)<sub>6</sub>·4H<sub>2</sub>O, H<sub>2</sub>O<sub>2</sub>, EtOH; (l) 1,2,4,5-di-O-isopropylidene-D-erythro-2,3-hexodiolo-2,6-pyranose, oxone, K<sub>2</sub>CO<sub>3</sub>, MeCN/0.05 M Na<sub>2</sub>B<sub>4</sub>O<sub>7</sub>·10H<sub>2</sub>O in 0.4 mM Na<sub>2</sub>EDTA; (m) DEIPSCI, imidazole, DMF.

#### Fragment 3

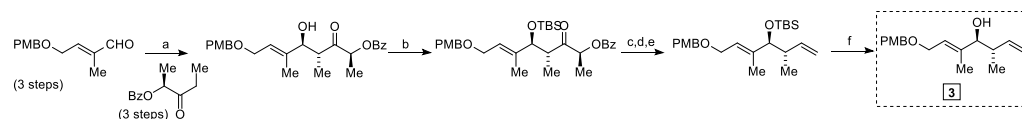

Reagents: (a) Cy<sub>2</sub>BCl, Me<sub>2</sub>NEt, diethyl ether; (b) TBSOTf, 2,6-lutidine, CH<sub>2</sub>Cl<sub>2</sub>; (c) LiBH<sub>4</sub>, THF; (d) NaIO<sub>4</sub>, THF/H<sub>2</sub>O; (e) methyltriphenylphosphonium iodide, nBuLi, THF; (f) 1N HCl, MeCN.

#### Pladienolide B

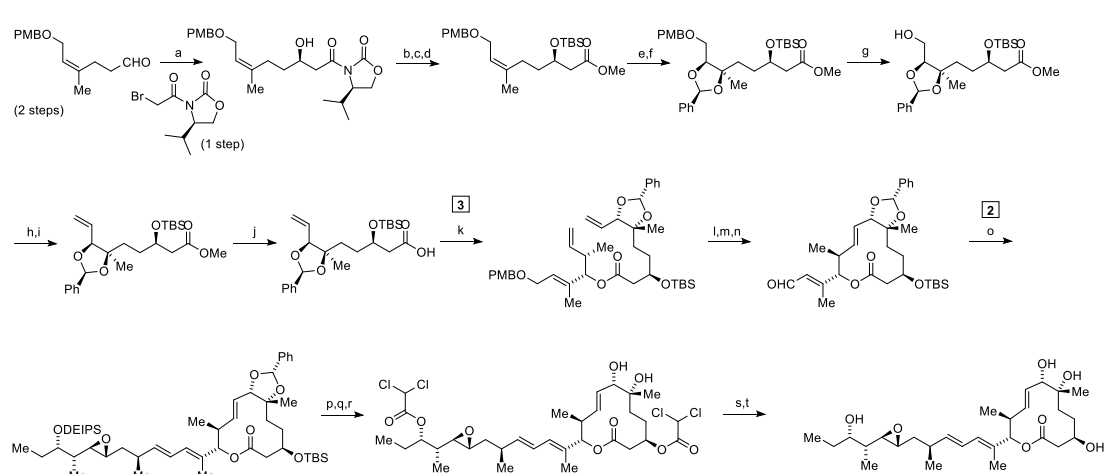

Reagents: (a) Sm<sup>0</sup>, CH<sub>2</sub>I<sub>2</sub>, THF; (b) LiOH, H<sub>2</sub>O<sub>2</sub>, THF/H<sub>2</sub>O; (c) TMS diazomethane, THF/MeOH; (d) TBSCl, imidazole, DMF; (e) AD-mix-a, methanesulfonamide, *t*BuOH/H<sub>2</sub>O; (f) benzaldehyde-dimethyl acetal, PPTS, CH<sub>2</sub>I<sub>2</sub>; (g) DDO, CH<sub>2</sub>Cl<sub>2</sub>/H<sub>2</sub>O; (h) DMP, CH<sub>2</sub>Cl<sub>2</sub>; (i) methyltriphenylphosphonium iodide, nBuLi; (j) LiOH, THF/MeOH/H<sub>2</sub>O; (k) 2,4,6-trichlorobenzoyl chloride, Et<sub>3</sub>N, THF, then DMAP, toluene; (l) 2nd-generation Hoveyda-Grubbs catalyst, BHT, toluene; (m) DDO, CH<sub>2</sub>Cl<sub>2</sub>/Ph 7 buffer; (n) DMP, CH<sub>2</sub>Cl<sub>2</sub>; (o) KHMDS, THF; (p) TBAF, THF; (q) dichloroacetic anhydride, Et<sub>3</sub>N, DMAP, CH<sub>2</sub>Cl<sub>2</sub>; (r) PPTS, MeOH; (s) K<sub>2</sub>CO<sub>3</sub>, MeOH; (t) acetic anhydride, Et<sub>3</sub>N, DMAP, CH<sub>2</sub>Cl<sub>2</sub>.

**B. Kotake et al., Pladienolide D, *Angew. Chem. Int. Ed.*, 2007, 46, 4350.**

**Fragment 1**

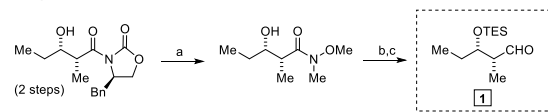

Reagents: (a) *N,N*-dimethylhydroxylamine hydrochloride, Me<sub>3</sub>Al, CH<sub>2</sub>Cl<sub>2</sub>; (b) TBSOTf, 2,6-lutidine, CH<sub>2</sub>Cl<sub>2</sub>; (c) DIBAL, toluene.

**Fragment 2**

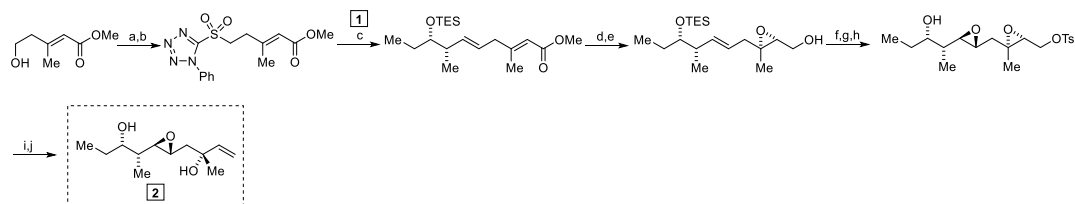

Reagents: (a) 5-mercapto-1-phenyltetrazole, Ph<sub>3</sub>P, DIAD, THF; (b) MoO<sub>7</sub>(NH<sub>4</sub>)<sub>6</sub>·4H<sub>2</sub>O, H<sub>2</sub>O<sub>2</sub>, EtOH; (c) KHMDS, DME/THF; (d) DIBAL, toluene; (e) Ti(O*i*Pr)<sub>4</sub>, (-)-DET, *t*BuOOH, 4A MS, CH<sub>2</sub>Cl<sub>2</sub>; (f) TsCl, Et<sub>3</sub>N, DMAP, CH<sub>2</sub>Cl<sub>2</sub>; (g) 1N HCl, THF; (h) 1,2,4,5-di-*O*-isopropylidene-D-erythro-2,3-hexodiuro-2,6-pyranose, oxone, K<sub>2</sub>CO<sub>3</sub>, MeCN/aqueous Na<sub>2</sub>EDTA (4 × 10<sup>-4</sup> M); (i) KI, acetone-DMF; (j) Zn, Cu, EtOH/H<sub>2</sub>O.

**Fragment 3**

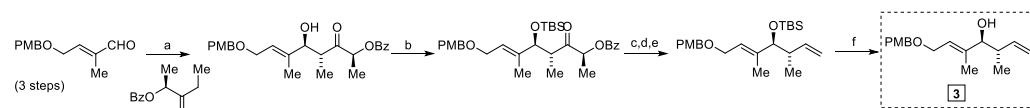

Reagents: (a) Cy<sub>2</sub>BCl, Me<sub>2</sub>NEt, diethyl ether; (b) TBSOTf, 2,6-lutidine, CH<sub>2</sub>Cl<sub>2</sub>; (c) LiBH<sub>4</sub>, THF; (d) NaIO<sub>4</sub>, THF/H<sub>2</sub>O; (e) methyltriphenylphosphonium iodide, *n*BuLi, THF; (f) 1N HCl, MeCN.

**Pladienolide D**

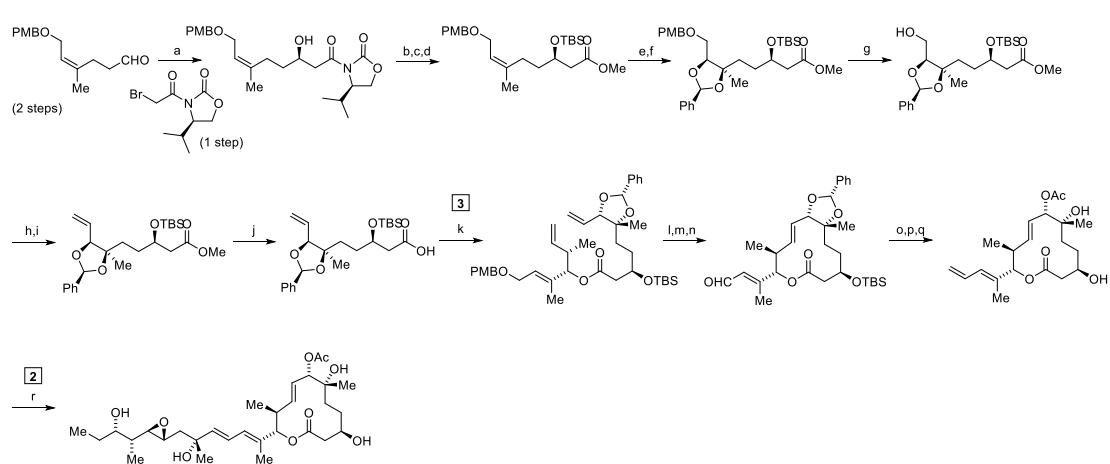

Reagents: (a) Sm<sup>0</sup>, CH<sub>2</sub>I<sub>2</sub>, THF; (b) LiOH, H<sub>2</sub>O<sub>2</sub>, THF/H<sub>2</sub>O; (c) TMS diazomethane, THF/MeOH; (d) TBSCl, imidazole, DMF; (e) AD-mix-*a*, methanesulfonamide, *t*BuOH/H<sub>2</sub>O; (f) benzaldehyde-dimethyl acetal, PPTS, CH<sub>2</sub>Cl<sub>2</sub>; (g) DDQ, CH<sub>2</sub>Cl<sub>2</sub>/H<sub>2</sub>O; (h) DMP, CH<sub>2</sub>Cl<sub>2</sub>; (i) methyltriphenylphosphonium iodide, *n*BuLi; (j) LiOH, THF/MeOH/H<sub>2</sub>O; (k) 2,4,6-trichlorobenzoyl chloride, Et<sub>3</sub>N, THF, then DMAP, toluene; (l) 2nd-generation Hoveyda-Grubbs catalyst, BHT, toluene; (m) DDQ, CH<sub>2</sub>Cl<sub>2</sub>/pH 7 buffer; (n) DMP, CH<sub>2</sub>Cl<sub>2</sub>; (o) Tebbe reagent, pyridine, toluene; (p) PPTS, MeOH; (q) acetic anhydride, Et<sub>3</sub>N, DMAP, CH<sub>2</sub>Cl<sub>2</sub>; (r) 2nd generation Grubbs catalyst, CH<sub>2</sub>Cl<sub>2</sub>.

C. Ghosh et al., Pladienolide B, *Org. Lett.*, **2012**, *14*, 4730.

**Fragment 1**

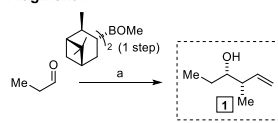

Reagents: (a) KO<sup>t</sup>Bu, nBuLi, *cis*-2-butene, BF<sub>3</sub>OEt<sub>2</sub>, THF

**Fragment 2**

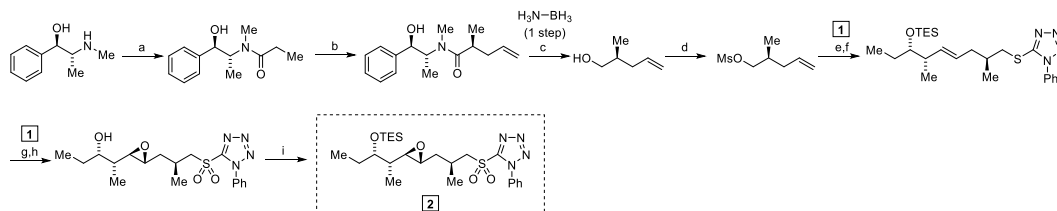

Reagents: (a) propionyl chloride, Et<sub>3</sub>N, CH<sub>2</sub>Cl<sub>2</sub>; (b) LDA, LiCl, allyl iodide, THF; (c) nBuLi, THF; (d) MsCl, Et<sub>3</sub>N, CH<sub>2</sub>Cl<sub>2</sub>; (e) 2nd generation grubbs catalyst, CuI, Et<sub>2</sub>O; (f) 1-phenyl-1*H*-tetrazole-5-thiol, NaH, THF; (g) (NH<sub>4</sub>)<sub>6</sub>Mo<sub>7</sub>O<sub>24</sub>, H<sub>2</sub>O<sub>2</sub>, EtOH (h) 1,2,4,5-di-*O*-isopropylidene-D-erythro-2,3-hexodiuro-2,6-pyranose, oxone, K<sub>2</sub>CO<sub>3</sub>, 0.05 M Na<sub>2</sub>B<sub>4</sub>O<sub>7</sub> 10H<sub>2</sub>O/0.4 mM Na<sub>2</sub>EDTA, MeCN; (i) TESCl, imidazole, CH<sub>2</sub>Cl<sub>2</sub>.

**Fragment 3**

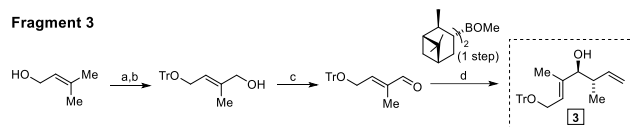

Reagents: (a) trityl chloride, Et<sub>3</sub>N, DMAP, CH<sub>2</sub>Cl<sub>2</sub>; (b) SeO<sub>2</sub>, *t*BuOOH, salicylic acid, CH<sub>2</sub>Cl<sub>2</sub>; (c) MnO<sub>2</sub>, CH<sub>2</sub>Cl<sub>2</sub>; (d) KO<sup>t</sup>Bu, nBuLi, *trans*-2-butene, BF<sub>3</sub>OEt<sub>2</sub>, THF.

**Pladienolide B**

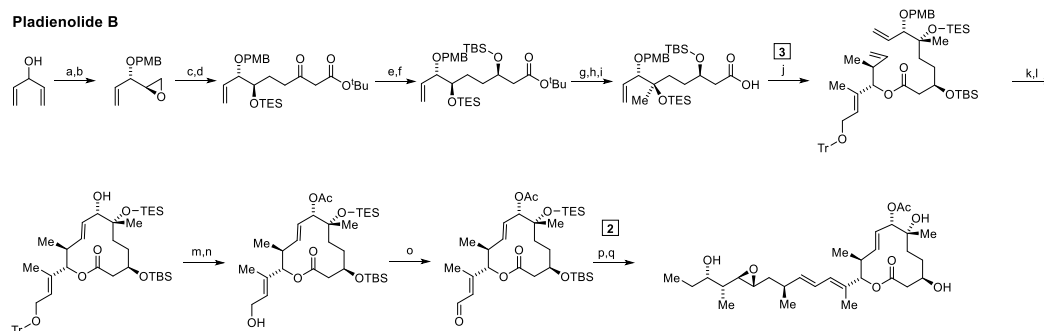

Reagents: (a) L-(+)-DIPT, Ti(O<sup>i</sup>Pr)<sub>4</sub>, *t*BuOOH, CH<sub>2</sub>Cl<sub>2</sub>; (b) NaH, PMBB, TBAI, THF; (c) NaH, nBuLi, *tert*-butyl acetoacetate, THF; (d) TESCl, imidazole, CH<sub>2</sub>Cl<sub>2</sub>; (e) NaBH<sub>4</sub>, L-tartaric acid, THF; (f) TESCl, imidazole, CH<sub>2</sub>Cl<sub>2</sub>; (g) IBX, THF, DMSO; (h) MeMgBr, THF; (i) TESOTf, Et<sub>3</sub>N, CH<sub>2</sub>Cl<sub>2</sub>; (j) 2,4,6-trichlorobenzoyl chloride, Et<sub>3</sub>N, THF, DMAP, toluene; (k) DDQ, CH<sub>2</sub>Cl<sub>2</sub>; (l) 2nd generation Grubbs catalyst, toluene; (m) acetic anhydride, pyridine; (n) DDQ, CH<sub>2</sub>Cl<sub>2</sub>; (o) IBX, THF, DMSO; (p) KHMDS, THF; (q) TBAF, THF.



E. Chandrasekhar et al., Pladienolide B, *Org. Lett.*, 2013, 15, 3610.

Fragment 1

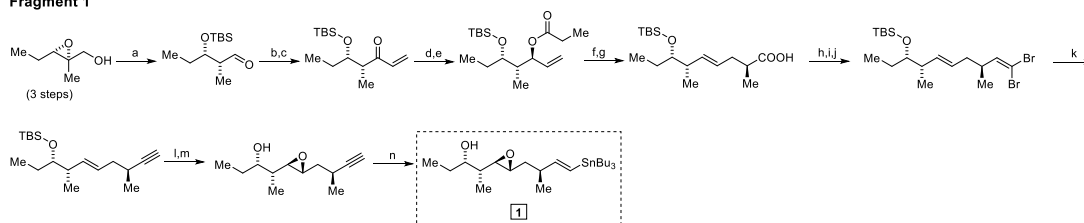

Reagents: (a) TBSOTf, DIPEA,  $\text{CH}_2\text{Cl}_2$ ; (b) vinylmagnesium bromide, THF; (c)  $\text{MnO}_2$ ,  $\text{CH}_2\text{Cl}_2$ ; (d) (S)-2-methyl-CBS-oxazaborolidine,  $\text{BH}_3\text{SMe}_2$ , THF; (e)  $(\text{C}_2\text{H}_5\text{CO})_2\text{O}$ ,  $\text{Et}_3\text{N}$ ,  $\text{CH}_2\text{Cl}_2$ ; (f) LDA, THF, then TBSCl, HMPA/THF; (g)  $\text{K}_2\text{CO}_3$ , MeOH; (h)  $\text{LiAlH}_4$ ,  $\text{Et}_2\text{O}$ ; (i) DMP,  $\text{CH}_2\text{Cl}_2$ ; (j)  $\text{CBr}_4$ ,  $\text{Ph}_3\text{P}$ ,  $\text{Et}_3\text{N}$ ,  $\text{CH}_2\text{Cl}_2$ ; (k) *n*-BuLi, THF; (l) TBAF, THF; (m) 1,2,4,5-di-*O*-isopropylidene-D-erythro-2,3-hexodiuoro-2,6-pyranose,  $\text{K}_2\text{CO}_3$ , oxone,  $\text{Na}_2\text{B}_4\text{O}_7$ ,  $\text{CH}_3\text{CN}$ ; (n)  $n\text{Bu}_3\text{SnH}$ ,  $\text{Pd}(\text{PPh}_3)_4$ , THF.

Fragment 2

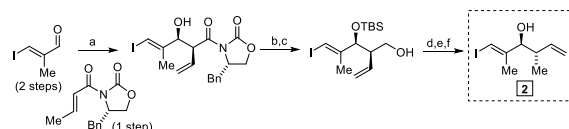

Reagents: (a) *n*Bu<sub>2</sub>BOTf, Et<sub>3</sub>N,  $\text{CH}_2\text{Cl}_2$ ; (b) TBSOTf, DIPEA,  $\text{CH}_2\text{Cl}_2$ ; (c)  $\text{LiBH}_4$ , EtOH, THF; (d)  $\text{Ts}_2\text{O}$ , Et<sub>3</sub>N,  $\text{CH}_2\text{Cl}_2$ ; (e)  $\text{LiAlH}_4$ ,  $\text{Et}_2\text{O}$ ; (f) TBAF, THF.

Pladienolide B

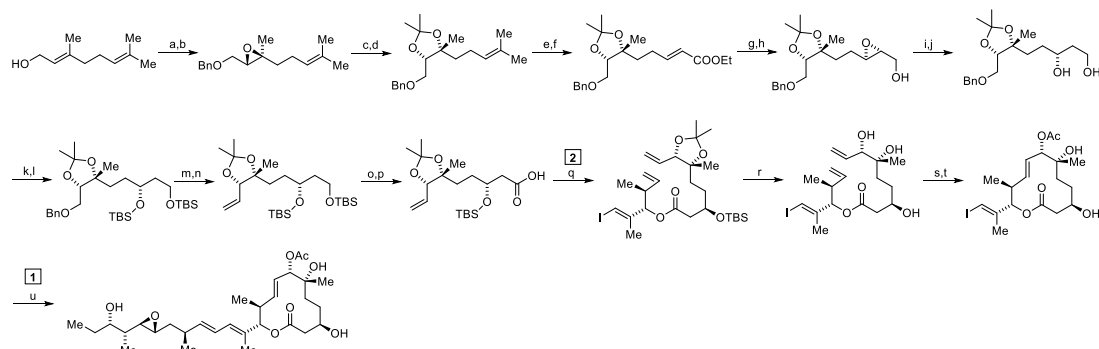

Reagents: (a) (+)-DET,  $\text{Ti}(\text{O}i\text{Pr})_4$ , TBHP, 4A MS,  $\text{CH}_2\text{Cl}_2$ ; (b) BnBr, NaH, THF; (c)  $\text{HClO}_4$ , THF/ $\text{H}_2\text{O}$ ; (d) 2,2-DMP, CSA,  $\text{CH}_2\text{Cl}_2$ ; (e)  $\text{O}_3$ ,  $\text{CH}_2\text{Cl}_2$ ; (f)  $\text{Ph}_3\text{P}=\text{CHCO}_2\text{Et}$ ,  $\text{C}_6\text{H}_6$ ; (g) DIBAL-H,  $\text{CH}_2\text{Cl}_2$ ; (h) (-)-DET,  $\text{Ti}(\text{O}i\text{Pr})_4$ , TBHP, 4A MS,  $\text{CH}_2\text{Cl}_2$ ; (i) Red-Al, THF; (j)  $\text{NaIO}_4$ , THF/ $\text{H}_2\text{O}$ ; (k) TBSCl, imidazole, DMAP,  $\text{CH}_2\text{Cl}_2$ ; (l)  $\text{H}_2$ , Raney-Ni, MeOH; (m) DMP,  $\text{CH}_2\text{Cl}_2$ ; (n)  $\text{CH}_3\text{P}^+\text{Ph}_3\text{Br}^-$ , *n*BuLi, THF; (o) HF pyridine, THF; (p) BAIB, TEMPO,  $\text{CH}_3\text{CN}/\text{H}_2\text{O}$ ; (q) 2,4,6-trichlorobenzoyl chloride, Et<sub>3</sub>N, DMAP, toluene; (r) PPTS, MeOH; (s) 2nd generation Hoveyda-Grubbs, MeOH; (t) acetic anhydride, pyridine; (u)  $\text{Pd}(\text{dba})_3$ ,  $\text{Ph}_2\text{As}$ , NMP, LiCl.

F. Maier et al., Pladienolide B, *Eur. J. Org. Chem.*, 2014, 1025.

Fragment 1

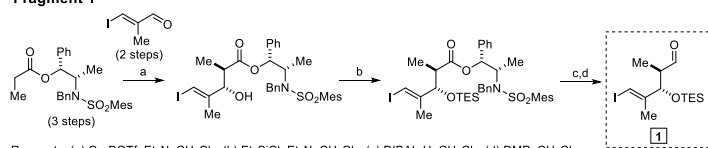

Reagents: (a)  $\text{Cy}_2\text{BOTf}$ ,  $\text{Et}_3\text{N}$ ,  $\text{CH}_2\text{Cl}_2$ ; (b)  $\text{Et}_3\text{SiCl}$ ,  $\text{Et}_3\text{N}$ ,  $\text{CH}_2\text{Cl}_2$ ; (c) DIBAL-H,  $\text{CH}_2\text{Cl}_2$ ; (d) DMP,  $\text{CH}_2\text{Cl}_2$ .

Fragment 2

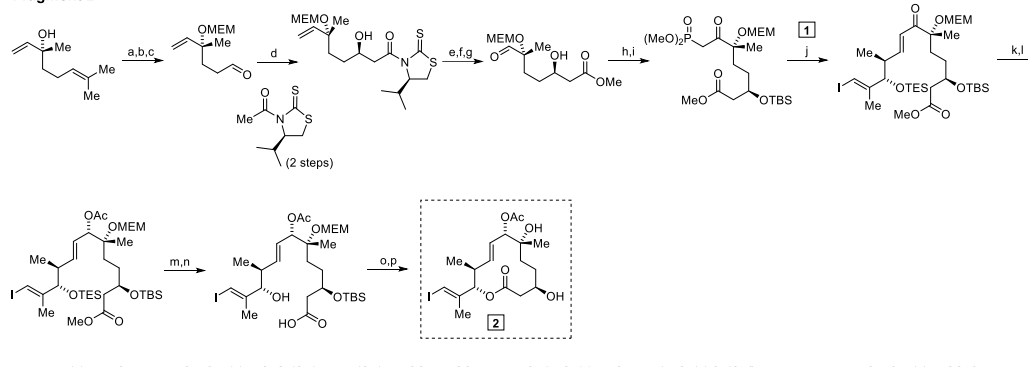

Reagents: (a) MEMCl,  $i\text{-Pr}_2\text{NEt}$ ,  $\text{CH}_2\text{Cl}_2$ ; (b)  $\text{K}_2\text{OsO}_2(\text{OH})_4$ ,  $\text{K}_3\text{Fe}(\text{CN})_6$ ,  $\text{K}_2\text{CO}_3$ ,  $\text{MeSO}_2\text{NH}_2$ ,  $t\text{BuOH}/\text{H}_2\text{O}$ ; (c)  $\text{NaIO}_4$ ,  $\text{THF}/\text{H}_2\text{O}$ ; (d)  $\text{Sn}(\text{OTf})_2$ ,  $N$ -ethylpiperidine,  $\text{CH}_2\text{Cl}_2$ ; (e) TBSOTf, 2,6-lutidine,  $\text{CH}_2\text{Cl}_2$ ; (f) imidazole,  $\text{MeOH}$ ; (g)  $\text{O}_3$ ,  $\text{CH}_2\text{Cl}_2$ ; (h)  $\text{MeP}(\text{O})(\text{OMe})_2$ ,  $n\text{BuLi}$ ,  $\text{THF}$ ; (i) DMP,  $\text{CH}_2\text{Cl}_2$ ; (j)  $\text{BaO}$ ,  $\text{Et}_2\text{O}/\text{H}_2\text{O}$ ; (k)  $\text{ZnCl}_2$ ,  $\text{NaBH}_4$ ,  $\text{Et}_2\text{O}$ ; (l)  $\text{Ac}_2\text{O}$ ,  $\text{Et}_3\text{N}$ , DMAP,  $\text{CH}_2\text{Cl}_2$ ; (m)  $\text{Me}_3\text{SnOH}$ ,  $(\text{ClCH}_2)_2$ ; (n) DDQ,  $\text{MeCN}/\text{H}_2\text{O}$ ; (o) MNBA, DMAP,  $\text{CH}_2\text{Cl}_2$ ; (p)  $\text{AcOH}$ ,  $\text{HCl}$ .

Pladienolide B

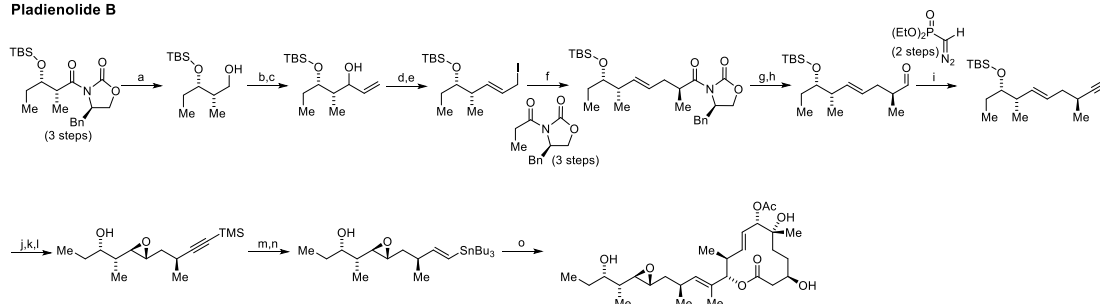

Reagents: (a)  $\text{LiBH}_4$ ,  $\text{Et}_2\text{O}/\text{MeOH}$ ; (b) DMP,  $\text{NaHCO}_3$ ,  $\text{CH}_2\text{Cl}_2$ ; (c) vinylmagnesium bromide,  $\text{THF}$ ; (d)  $\text{SOCl}_2$ ,  $\text{Et}_2\text{O}/\text{hexane}$ ; (e)  $\text{NaI}$ , acetone; (f)  $\text{NaN}(\text{SiMe}_3)_2$ ,  $\text{THF}$ ; (g)  $\text{LiBH}_4$ ,  $\text{Et}_2\text{O}/\text{MeOH}$ ; (h) DMP,  $\text{NaHCO}_3$ ,  $\text{CH}_2\text{Cl}_2$ ; (i)  $\text{KOtBu}$ ,  $\text{THF}$ ; (j)  $n\text{BuLi}$ ,  $\text{Me}_2\text{SiCl}_2$ ,  $\text{THF}$ ; (k) PPTS,  $\text{MeOH}$ ; (l) 1,2,3,4-di-*O*-isopropylidene- $\alpha$ -erythro-2,3-hexodiuoro-2,6-pyranose,  $\text{Na}_2\text{B}_2\text{O}_7 \cdot 10\text{H}_2\text{O}$ ,  $\text{Na}_2\text{EDTA}$ ,  $\text{K}_2\text{CO}_3$ , oxone,  $\text{CH}_3\text{CN}$ ; (m)  $\text{K}_2\text{CO}_3$ ,  $\text{MeOH}$ ; (n)  $\text{Bu}_3\text{SnH}$ ,  $\text{Pd}(\text{PPh}_3)_2\text{Cl}_2$ ,  $\text{THF}$ ; (o)  $\text{Pd}_2(\text{dba})_3$ ,  $\text{Ph}_3\text{As}$ ,  $\text{LiCl}$ ,  $\text{NMP}$ .



G. Keaney et al., 6-deoxypladienolide D, *Org. Lett.*, 2014, 16, 5560.

Fragment 1

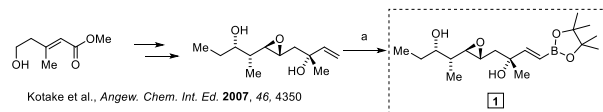

Reagents: (a) Zhan catalyst-1B, benzoquinone, DCE.

Fragment 2

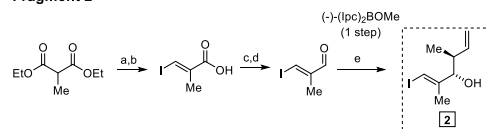

Reagents: (a) NaH, CH<sub>3</sub>I, Et<sub>2</sub>O; (b) aq KOH, EtOH/MeOH; (c) LiAlH<sub>4</sub>, THF; (d) MnO<sub>2</sub>, MTBE; (e) tBuOK, nBuLi, *trans*-2-butene, THF.

6-Deoxypladienolide D

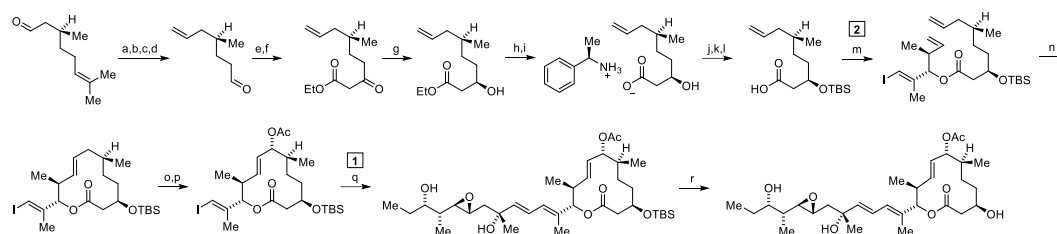

Reagents: (a) Me<sub>2</sub>SiCH<sub>2</sub>MgCl, THF; (b) tBuOK, THF; (c) AD-Mix-β, MeSO<sub>2</sub>NH<sub>2</sub>, tBuOH/H<sub>2</sub>O; (d) NaIO<sub>4</sub>, CH<sub>3</sub>CN/H<sub>2</sub>O; (e) NaClO<sub>2</sub>, NaH<sub>2</sub>PO<sub>4</sub>, 20methyl-2-butene, tBuOH/H<sub>2</sub>O; (f) CDI, ethyl potassium malonate, MgCl<sub>2</sub>, Et<sub>3</sub>N, CH<sub>2</sub>CN; (g) NaBH<sub>4</sub>, (L)-tartaric acid, THF; (h) aq LiOH, THF/MeOH; (i) (R)-(+)-α-methyl-benzylamine, CH<sub>2</sub>CN/MeOH; (j) aq HCl; (k) TBSCl, imidazole, DMF; (l) aq LiOH, THF/MeOH; (m) EDC, Et<sub>3</sub>N, DMAP, CH<sub>2</sub>Cl<sub>2</sub>; (n) 2nd generation Hoveyda-Grubbs catalyst, benzoquinone, toluene; (o) SeO<sub>2</sub>, 1,4-dioxane; (p) Ac<sub>2</sub>O, Et<sub>3</sub>N, DMAP, CH<sub>2</sub>Cl<sub>2</sub>; (q) Pd<sub>2</sub>(dba)<sub>3</sub>, Ph<sub>3</sub>As, Ag<sub>2</sub>O, THF; (r) TBAF, THF.

## 2-Methylpenta-1,4-dien-3-ol (1)

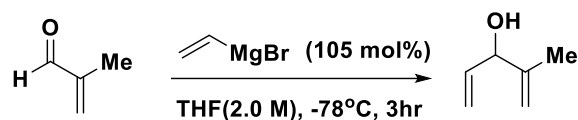

An oven-dried flask equipped with a magnetic stir bar was placed under an atmosphere of argon. Methacrolein (31.5 mL, 0.38 mol, 100 mol%) and THF (190 mL, 2.0 M) were added and the resulting solution was cooled to 0 °C. Vinyl magnesium bromide solution (1.0 M in THF, 400 mL, 105 mol%) was added dropwise. The reaction mixture was allowed to warm to ambient temperature and was stirred for 3 hours. The reaction mixture was cooled to 0 °C and NH<sub>4</sub>Cl (aq) was added followed by acidification with HCl aq (2.0 N). The biphasic mixture was transferred to a separatory funnel and the aqueous phase was extracted with diethyl ether (3 x 100 mL). The combined organic layers were dried (Na<sub>2</sub>SO<sub>4</sub>), filtered and concentrated *in vacuo*. The resulting liquid was isolated by distillation under reduced pressure (60 mbar) to furnish the title compound (27.7g, 0.28 mol) in 75% yield as a colorless oil.

**TLC** (SiO<sub>2</sub>): R<sub>f</sub> = 0.36 (pentane/diethyl ether = 5:1).

**<sup>1</sup>H NMR** (400 MHz, CDCl<sub>3</sub>): δ 5.90 – 5.81 (m, 1H), 5.30 (dt, J = 17.1, 1.5 Hz, 1H), 5.17 (dt, J = 10.3, 1.4 Hz, 1H), 5.03 (d, J = 1.7 Hz, 1H), 4.88 (t, J = 1.7 Hz, 1H), 4.54 (d, J = 6.0 Hz, 1H), 1.72 (t, J = 1.1 Hz, 3H).

**<sup>13</sup>C NMR** (125 MHz, CDCl<sub>3</sub>): δ 146.1, 138.9, 115.7, 111.1, 18.1.

**FTIR** (neat): 3338, 1058, 989, 920, 898 668 cm<sup>-1</sup>.

**HRMS** (CI) calcd. for C<sub>6</sub>H<sub>10</sub>O [M-H]<sup>+</sup> : 97.0659, found: 97.0652.

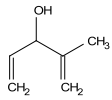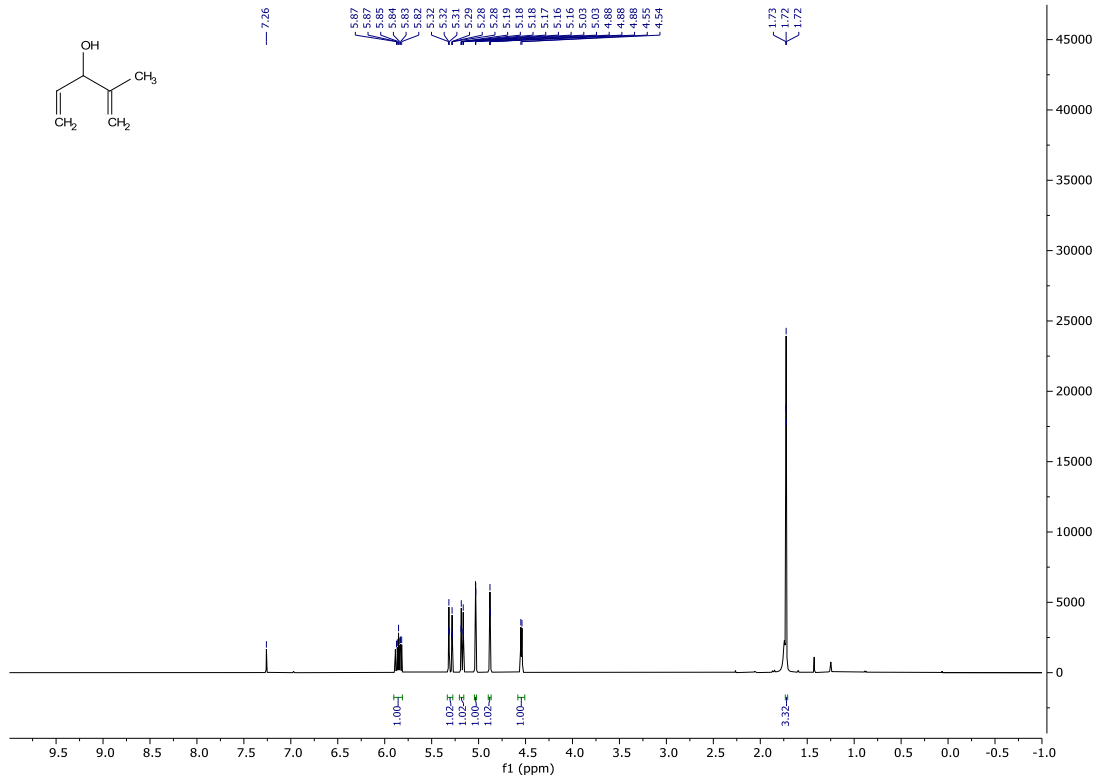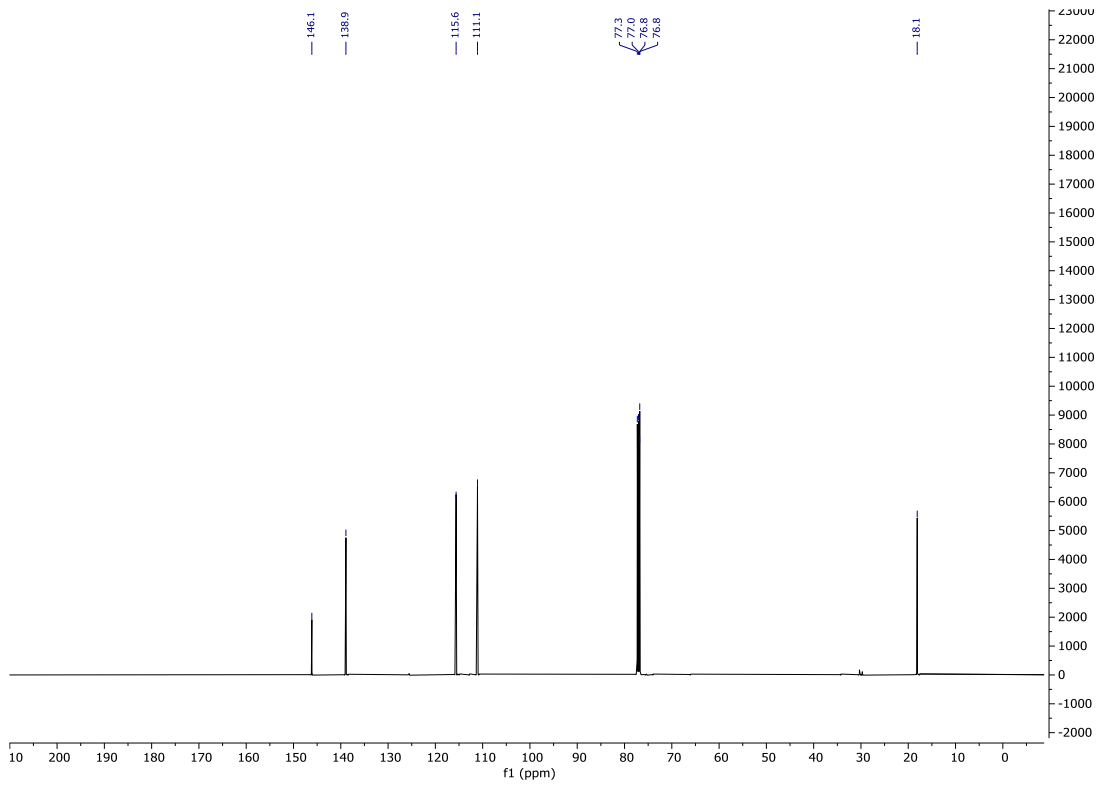

**(S)-1-[(R)-2-methyloxiran-2-yl]prop-2-en-1-ol (2)**

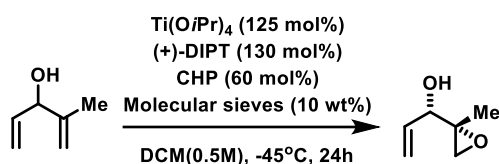

To a suspension of powdered 4Å molecular sieves (0.2 g, 10 wt%) in CH<sub>2</sub>Cl<sub>2</sub> (400 mL, 0.5 M) were added L-(+)-diisopropyl tartrate (55.4 mL, 0.26 mol, 130 mol%) and Ti(OiPr)<sub>4</sub> (75.4 mL, 0.25 mol, 125 mol%) at room temperature. The mixture was allowed to stir for 1 hr. Cumene hydroperoxide (80% solution, 22.6 mL, 0.12 mol, 60 mol%) was added and the reaction mixture was allowed to stir for 30 min. The reaction mixture was cooled to -45 °C and a solution of 2-methylpenta-1,4-dien-3-ol (20.0 g, 0.20 mol, 100 mol%) in CH<sub>2</sub>Cl<sub>2</sub> (100 mL) was slowly added. The reaction mixture was allowed to stir for 24 hr. NaOH aq (0.25 N) was added and the reaction mixture was allowed to stir for 1 hr at 0 °C. The biphasic mixture was transferred to a separatory funnel and the aqueous phase was extracted with diethyl ether (3 x 50 mL). The combined organic layers were dried (Na<sub>2</sub>SO<sub>4</sub>), filtered and concentrated *in vacuo*. The resulting oil was subjected to flash chromatography (SiO<sub>2</sub>: 5:2 pentanes:diethyl ether). Subsequent distillation under reduced pressure (60 mbar) to furnish the title compound (7.19 g, 0.06 mol) in 31% yield, 95% ee, >20:1 dr as a clear oil.

**TLC** (SiO<sub>2</sub>): R<sub>f</sub> = 0.14 (pentane/diethyl ether = 5:1).

**<sup>1</sup>H NMR** (400 MHz, CDCl<sub>3</sub>): δ 5.84 – 5.74 (m, 1H), 5.38 (dt, *J* = 17.3, 1.5 Hz, 1H), 5.25 (dt, *J* = 10.4, 1.3 Hz, 1H), 4.09 (d, *J* = 6.7 Hz, 1H), 2.90 (d, *J* = 4.8 Hz, 1H), 2.60 (d, *J* = 4.7 Hz, 1H), 2.36 (br, 1H), 1.33 (s, 3H).

**<sup>13</sup>C NMR** (125 MHz, CDCl<sub>3</sub>): δ 135.9, 118.2, 73.0, 58.7, 50.1, 17.9.

**FTIR** (neat): 3410, 2985, 1392, 1366, 1256, 1132, 1106, 1071, 992, 928, 873, 827, 764, 747, 804, 702 cm<sup>-1</sup>.

**HRMS** (ESI) calcd. for C<sub>6</sub>H<sub>12</sub>O<sub>2</sub> [M+Na]<sup>+</sup> : 137.0573, found: 137.0572.

**[α]<sub>D</sub><sup>28</sup>**: +58.2 (*c* 1.00, CHCl<sub>3</sub>).

**HPLC**: Enantiomeric excess was determined by HPLC analysis of the *tert*-butyldiphenylsilyl ether derivative of the product (**S1**) (two Chiralcel AD-H columns, hexanes:*i*-PrOH = 99:1, flow rate = 1.0 mL/min, λ = 254 nm), 6.93 min (major enantiomer), 7.50 (minor enantiomer), *ee* = 95%.

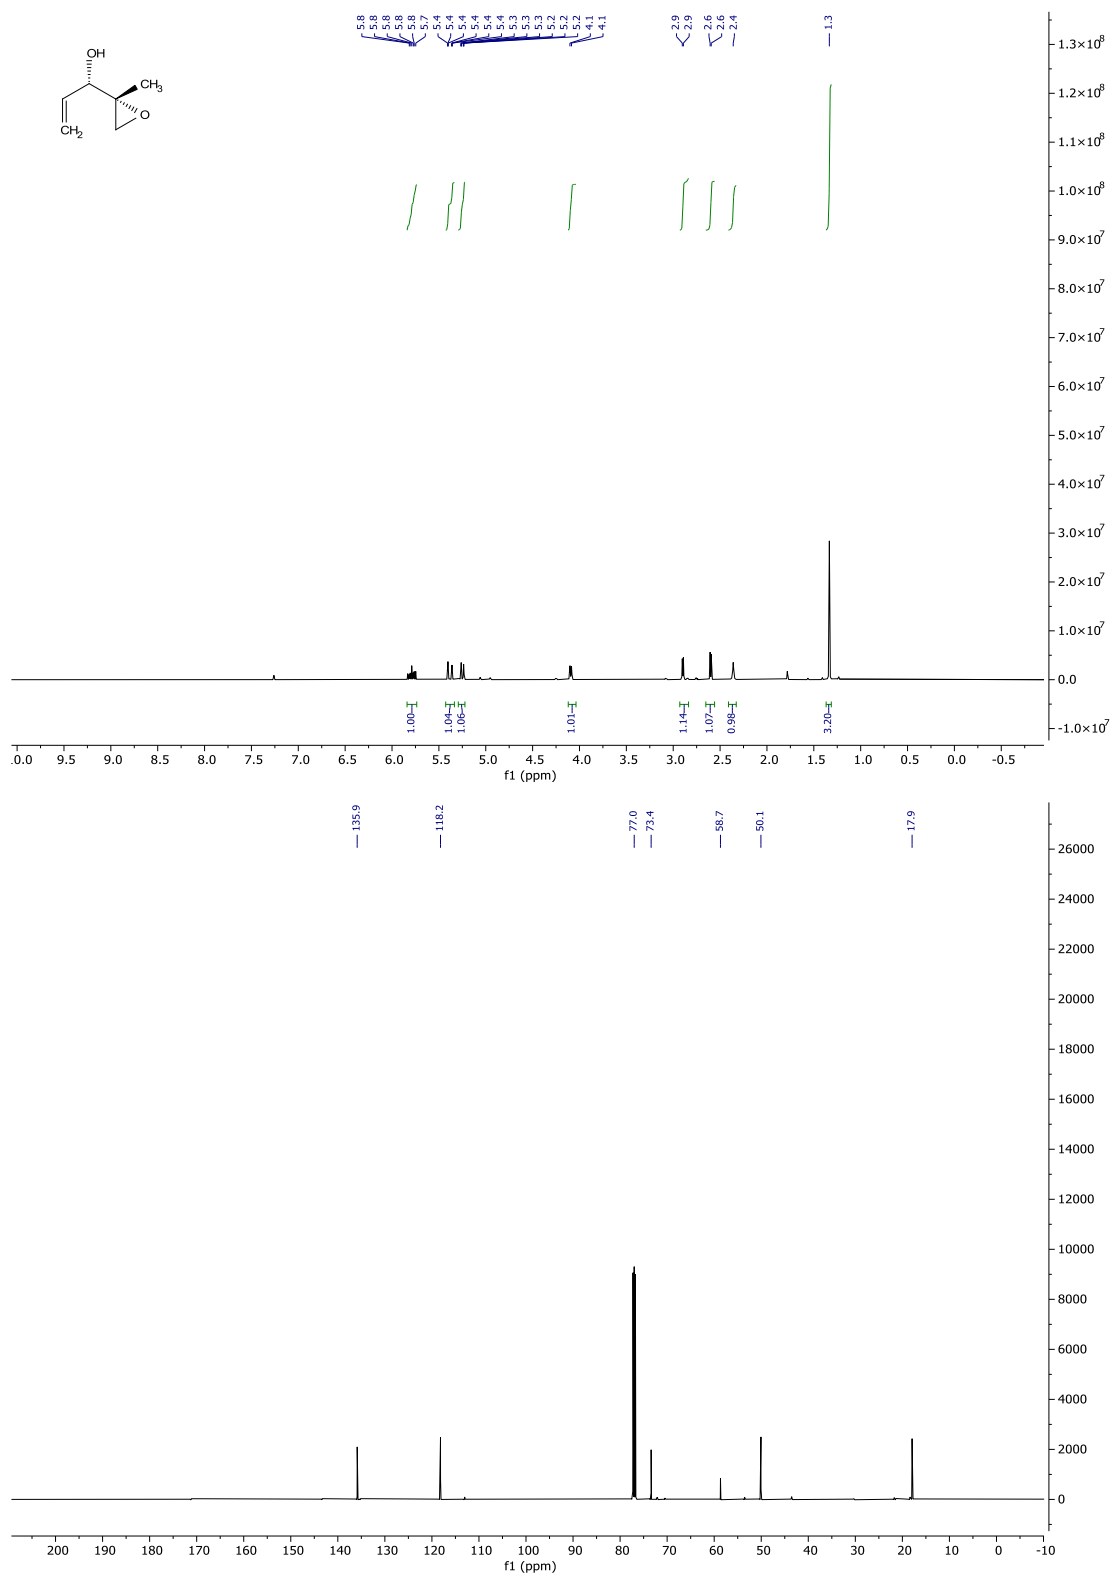

***tert*-Butyl(((S)-1-((R)-2-methyloxiran-2-yl)allyl)oxy)diphenylsilane**

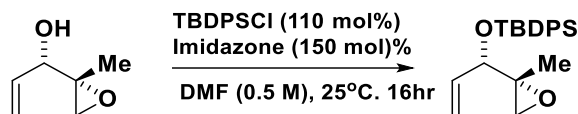

To a solution of epoxide **2** (11.4 mg, 0.1 mmol, 100 mol%) in DMF (0.2 mL, 0.5 M) was added TBDPSCI (30.2 mg, 0.11 mmol, 110 mol%) and imidazole (10.2 mg, 0.15 mmol, 150 mol%). The reaction was allowed to stir at room temperature for 16 h. Water was added and the biphasic mixture was transferred to a separatory funnel. The aqueous phase was extracted with ethyl acetate. The combined organic layers were dried ( $\text{Na}_2\text{SO}_4$ ), filtered and concentrated *in vacuo*. The resulting oil was subjected to flash chromatography ( $\text{SiO}_2$ : 10:1 hexanes:ethyl acetate) to furnish the title compound (30.7 mg, 0.087 mmol) in 87% yield as a colorless oil.

**TLC** ( $\text{SiO}_2$ ):  $R_f = 0.68$  (hexane:ethyl acetate = 5:1).

**$^1\text{H}$  NMR** (400 MHz,  $\text{CDCl}_3$ ):  $\delta$  7.70 – 7.64 (m, 4H), 7.43 – 7.36 (m, 6H), 5.92 (ddd,  $J = 17.3, 10.5, 5.3$  Hz, 1H), 5.31 (dt,  $J = 17.2, 1.7$  Hz, 1H), 5.20 (dt,  $J = 10.6, 1.6$  Hz, 1H), 3.73 (dt,  $J = 5.3, 1.5$  Hz, 1H), 2.27 (d,  $J = 4.9$  Hz, 1H), 1.97 (d,  $J = 4.9$  Hz, 1H), 1.29 (s, 3H), 1.08 (s, 9H).

**$^{13}\text{C}$  NMR** (101 MHz,  $\text{CDCl}_3$ ):  $\delta$  137.1, 136.1, 136.0, 136.0, 134.2, 133.6, 130.0, 129.9, 127.7, 127.7, 127.6, 116.6, 77.4, 58.3, 54.1, 27.2, 27.1, 19.6, 16.01.

**FTIR** (neat): 2931, 2857, 1427, 1110, 821, 740, 700  $\text{cm}^{-1}$ .

**HRMS** (ESI) Calcd. for  $\text{C}_{22}\text{H}_{28}\text{O}_2\text{Si}$   $[\text{M}+\text{Na}]^+$  : 375.1756, found: 375.1752.

**$[\alpha]_D^{26}$** : -5.5 ( $c$  1.00,  $\text{CHCl}_3$ ).



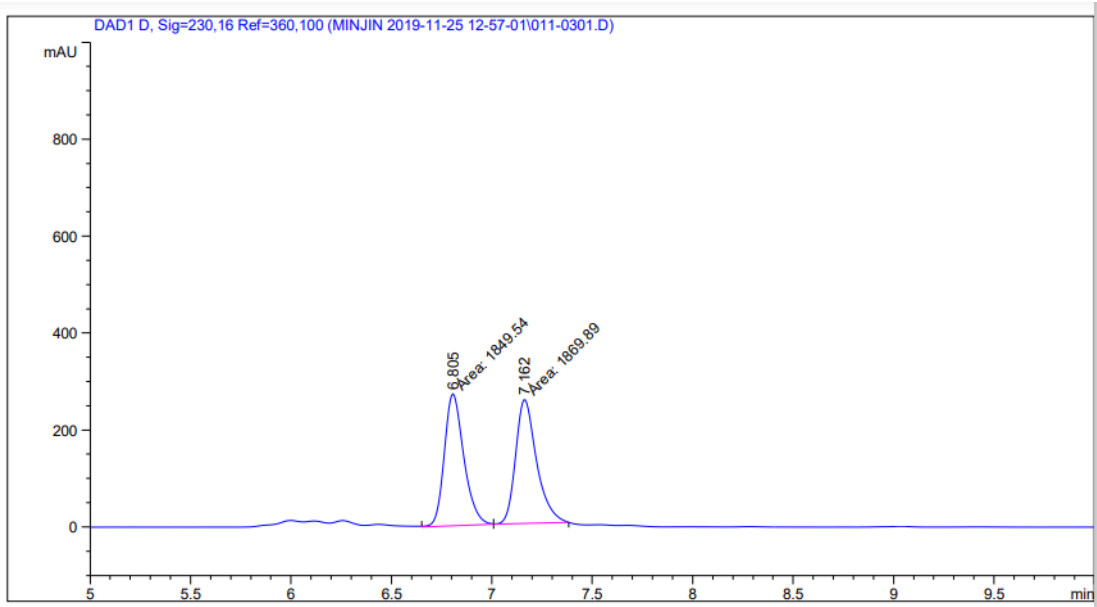

| Peak # | RetTime [min] | Type | Width [min] | Area [mAU*s] | Height [mAU] | Area %  |
|--------|---------------|------|-------------|--------------|--------------|---------|
| 1      | 6.805         | MM   | 0.1129      | 1849.53772   | 273.10748    | 49.7264 |
| 2      | 7.162         | MM   | 0.1215      | 1869.89270   | 256.59131    | 50.2736 |

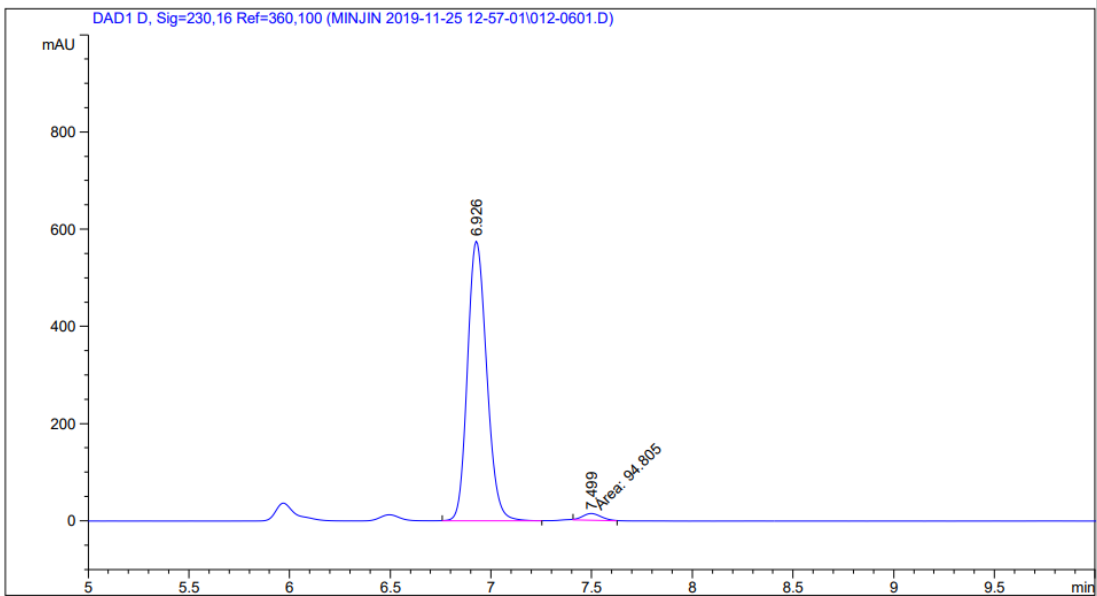

| Peak # | RetTime [min] | Type | Width [min] | Area [mAU*s] | Height [mAU] | Area %  |
|--------|---------------|------|-------------|--------------|--------------|---------|
| 1      | 6.926         | BB   | 0.1035      | 3827.39868   | 576.10651    | 97.5829 |
| 2      | 7.499         | MM   | 0.1109      | 94.80505     | 14.25133     | 2.4171  |



***tert*-Butyl (6*R*,7*S*)-7-acetoxy-6-hydroxy-6-methyl-3-oxonon-8-enoate (3)**

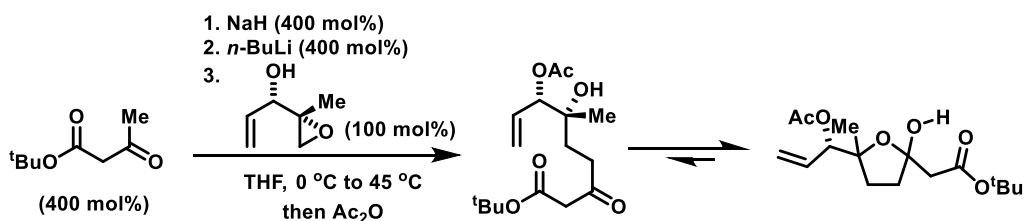

To a round-bottomed flask under an argon atmosphere charged with *tert*-butyl acetoacetate (11.6 mL, 70 mmol, 400 mol%) was added THF (175 mL, 0.1 M). The solution was cooled to 0 °C and NaH (60% in mineral oil, 2.80 g, 70 mmol, 400 mol%) was slowly added. The resulting suspension was stirred for 30 min, at which point *n*-BuLi (2.5 M in hexane, 28 mL, 70 mmol, 400 mol%) was added causing the solution to turn a light-yellow color. Epoxide **2** (2.0 g, 17.5 mmol, 100 mol%) was added and the reaction mixture was allowed to stir overnight at 40 °C. Acetic anhydride (6.63 mL, 70 mmol, 400 mol%) was added at 0 °C and the mixture was allowed to stir for 30 min. Water was added and the biphasic mixture was transferred to a separatory funnel. The aqueous phase was extracted with ethyl acetate. The combined organic layers were dried (Na<sub>2</sub>SO<sub>4</sub>), filtered and concentrated *in vacuo*. The liquid was subjected to flash chromatography (SiO<sub>2</sub>: 10:3 hexanes:ethyl acetate) to furnish the title compound (4.76 g, 15.2 mmol) in 86% yield as a clear yellow oil.

**TLC** (SiO<sub>2</sub>): R<sub>f</sub> = 0.39 (hexanes/ethyl acetate = 5:1).

**HRMS** (ESI) calcd. for C<sub>16</sub>H<sub>26</sub>O<sub>6</sub> [M+Na]<sup>+</sup>: 337.1622, found 337.1618.

**FTIR** (neat): 2977, 1740, 1699, 1368, 1639, 1456, 1321, 1231, 1152, 1110, 1019, 937, 883, 827, 763, 658cm<sup>-1</sup>.

**[α]<sup>28</sup><sub>D</sub>**: -5.0 (*c* 1.0, CHCl<sub>3</sub>).

**NOTE:** As compound **3** is an mixture of hydroxyl ketone and lactol, characterization by <sup>1</sup>H and <sup>13</sup>C NMR was conducted at the stage of compound **4**

***tert*-butyl (3*R*,6*R*,7*S*)-7-acetoxy-3,6-dihydroxy-6-methylnon-8-enoate (4)**

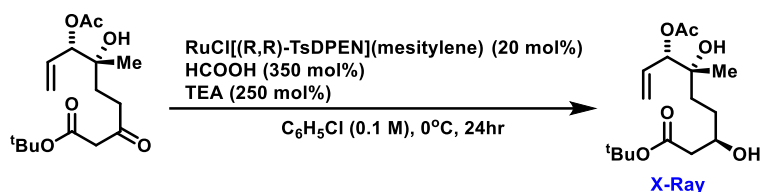

To a round-bottomed flask under a nitrogen atmosphere equipped with a magnetic stirring device charged with  $\beta$ -hydroxy ester **3** (0.70 g, 2.23 mmol, 100 mol%) was added RuCl(mesitylene)[(*R,R*)-TsDPEN] (0.28 mg, 0.45 mmol, 20 mol%) as a solution in chlorobenzene (22 mL, 0.1 M). A solution of formic acid (0.29 mL, 7.8 mmol, 350 mol%) and triethylamine (0.78 mL, 5.6 mmol, 250 mol%) was added at 0 °C. The reaction mixture was allowed to stir for 24 hr. Water was added and the biphasic mixture was transferred to a separatory funnel. The aqueous phase was extracted with ethyl acetate. The combined organic layers were dried (Na<sub>2</sub>SO<sub>4</sub>), filtered and concentrated *in vacuo*. The liquid was subjected to flash chromatography (SiO<sub>2</sub>: 1:1 – 1:2 hexanes:ethyl acetate) to furnish the title compound (0.50 g, 1.58 mmol) in 71% yield as a 4:1 mixture of diastereomers.

**TLC** (SiO<sub>2</sub>): R<sub>f</sub> = 0.19 (hexanes/ethyl acetate = 1:1).

**<sup>1</sup>H NMR** (500 MHz, CD<sub>3</sub>OD):  $\delta$  5.95 (ddd, *J* = 17.2, 11.0, 6.3 Hz, 1H), 5.28 (d, *J* = 1.5 Hz, 1H), 5.27 – 5.23 (m, 1H), 5.16 (dd, *J* = 6.3, 1.3 Hz, 1H), 3.92 (ddd, *J* = 7.5, 5.1, 2.3 Hz, 1H), 2.44 – 2.31 (m, 2H), 2.11 (s, 3H), 1.58 (ddd, *J* = 10.2, 7.2, 5.2 Hz, 4H), 1.48 (s, 9H), 1.16 (s, 3H).

**<sup>13</sup>C NMR** (125 MHz, CD<sub>3</sub>OD):  $\delta$  171.6, 170.5, 133.0, 117.4, 80.4, 79.8, 72.5, 68.6, 43.2, 33.7, 30.2, 27.0, 21.5, 19.6.

**HRMS** (ESI) calcd. for C<sub>16</sub>H<sub>28</sub>O<sub>6</sub> [M+Na]<sup>+</sup>: 339.1778, found 339.1783.

**FTIR** (neat): 3470, 2977, 1740, 1699, 1639, 1455, 1368, 1320, 1230, 1151, 1110, 1019, 937, 882, 827, 763, 658 cm<sup>-1</sup>.

**[ $\alpha$ ]<sub>D</sub><sup>26</sup>**: -12.0 (*c* 1.0, CHCl<sub>3</sub>).



**(3*R*,6*R*,7*S*)-7-Acetoxy-3,6-dihydroxy-6-methylnon-8-enoic acid**

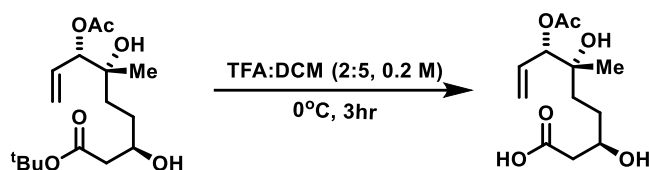

To a solution of *tert*-butyl ester (0.48 g, 1.52 mmol, 100 mol%) in CH<sub>2</sub>Cl<sub>2</sub> (15 mL, 0.1 M) at 0 °C was add TFA (4.3 mL). The reaction mixture was allowed to stir for 3 hr. The solvent was removed *in vacuo* and the residue was subjected to flash chromatography (SiO<sub>2</sub>: 95:5 CH<sub>2</sub>Cl<sub>2</sub>: MeOH with 0.01% acetic acid) to furnish the title compound (0.26 g, 0.95 mmol) in 63% yield as a colorless oil.

**TLC** (SiO<sub>2</sub>): R<sub>f</sub> = 0.1 (dichloromethane/methanol = 5:1).

**<sup>1</sup>H NMR** (500 MHz, CD<sub>3</sub>OD): δ 5.89 – 5.75 (m, 1H), 5.25 – 5.10 (m, 2H), 5.04 (dt, *J* = 6.5, 1.3 Hz, 1H), 3.85 (s, 1H), 2.33 (qd, *J* = 15.3, 6.4 Hz, 2H), 1.72 – 1.61 (m, 1H), 1.55 – 1.44 (m, 2H), 1.40 – 1.34 (m, 1H), 1.04 (s, 3H).

**<sup>13</sup>C NMR** (125 MHz, CD<sub>3</sub>OD): δ 174.1, 170.6, 132.9, 117.4, 79.8, 72.5, 68.4, 41.7, 33.7, 30.2, 21.5, 19.6.

**FTIR** (neat): 3355, 2938, 1713, 1372, 1238, 1025, 989, 935, 735, 702 cm<sup>-1</sup>.

**HRMS** (ESI) calcd. for C<sub>12</sub>H<sub>20</sub>O<sub>6</sub> [M+Na]<sup>+</sup>: 283.1152, found 283.1147.

**[α]<sub>D</sub><sup>26</sup>**: -10.5 (*c* 1.0, CHCl<sub>3</sub>).

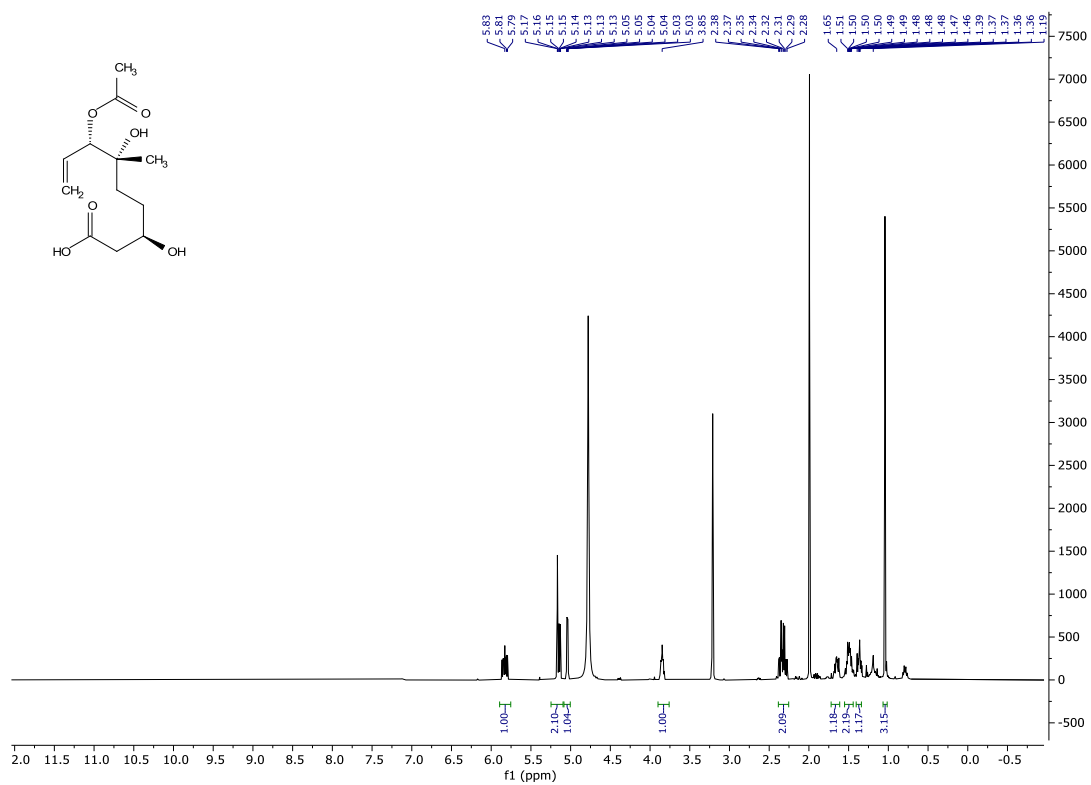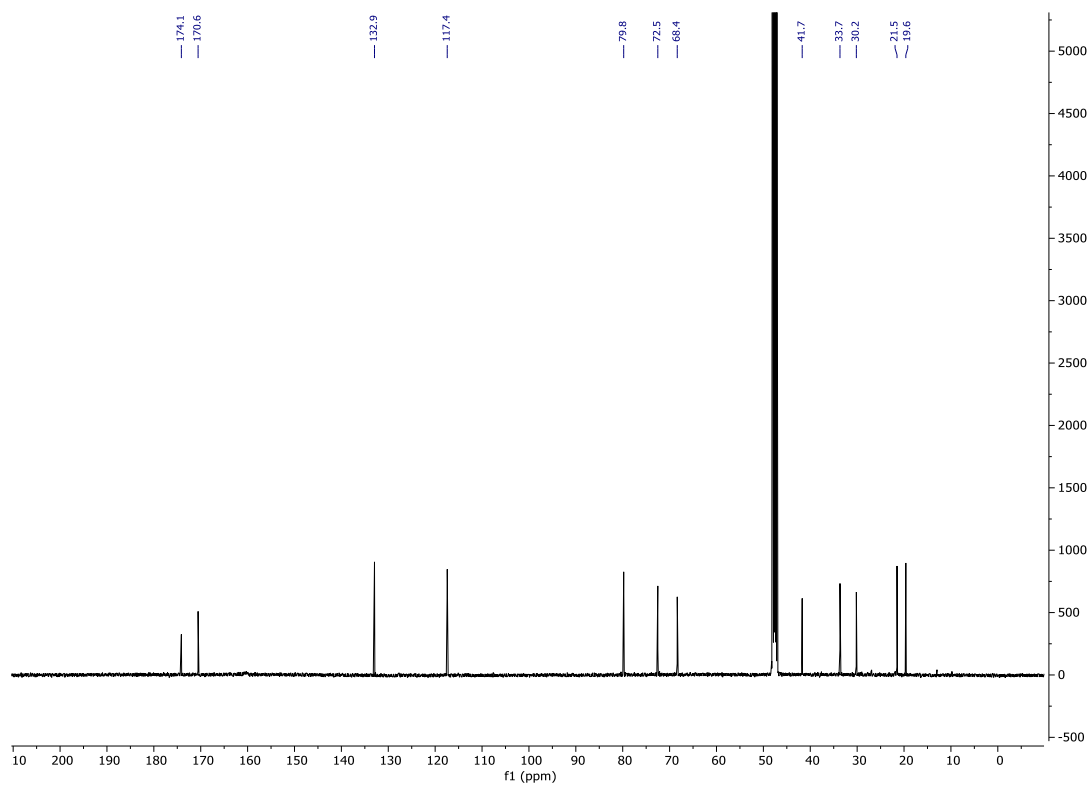

**(3*R*,6*R*,7*S*)-3-((*tert*-butyldimethylsilyl)oxy)-6,7-dihydroxy-6-methylnon-8-enoic acid (Fragment C)**

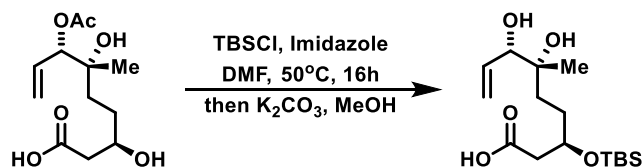

To a solution of acid **S2** (0.16 g, 0.6 mmol) in DMF (3.0 mL, 0.2 M) was added TBSCl (0.27 g, 1.8 mmol, 300 mol%) and imidazole (0.41 g, 3.6 mmol, 600 mol%). The reaction mixture was allowed to stir at 50 °C for 16 hr. Potassium carbonate (0.5 g, 3.6 mmol, 600 mol%) in MeOH (3.0 mL, 0.2 M) was added and the reaction mixture was allowed to stir at room temperature for 2 hr. A saturated solution of NaHSO<sub>4</sub> aq was added and the biphasic mixture was transferred to a separatory funnel. The aqueous phase was extracted with ethyl acetate. The combined organic layers were dried (Na<sub>2</sub>SO<sub>4</sub>), filtered and concentrated *in vacuo*. The residue was subjected to flash chromatography (SiO<sub>2</sub>: 9:1 dichloromethane/methanol with 0.01% acetic acid) to furnish the title compound (0.13 g, 0.39 mmol) in 65% yield as a colorless oil.

**TLC** (SiO<sub>2</sub>): R<sub>f</sub> = 0.41 (dichloromethane/methanol = 9:1 with 0.01% acetic acid).

**<sup>1</sup>H NMR** (400 MHz, CD<sub>3</sub>OD): δ 6.06 – 5.93 (m, 1H), 5.36 – 5.25 (m, 1H), 5.24 – 5.17 (m, 1H), 4.23 – 4.13 (m, 1H), 3.85 (dt, *J* = 6.1, 1.4 Hz, 1H), 2.48 – 2.34 (m, 2H), 1.74 – 1.56 (m, 3H), 1.52 – 1.42 (m, 1H), 1.10 (s, 3H), 0.89 (d, *J* = 0.6 Hz, 9H), 0.10 (s, 3H), 0.08 (s, 3H).

**<sup>13</sup>C NMR** (100 MHz, CD<sub>3</sub>OD): δ 175.7, 138.8, 116.8, 80.1, 74.9, 71.5, 54.8, 43.5, 34.1, 32.2, 26.4, 22.4, 18.9, -4.2, -4.6.

**HRMS** (ESI): calcd for C<sub>16</sub>H<sub>32</sub>O<sub>5</sub>Si [M+Na]<sup>+</sup> 355.1911, found 355.1914.

**FTIR** (neat): 2929, 2857, 1710, 1665, 1463, 1387, 1252, 1092, 997, 926, 889, 833, 810, 775, 735, 665 cm<sup>-1</sup>.

**[α]<sub>D</sub><sup>26</sup>**: -20.0 (*c* 1.0, CHCl<sub>3</sub>).

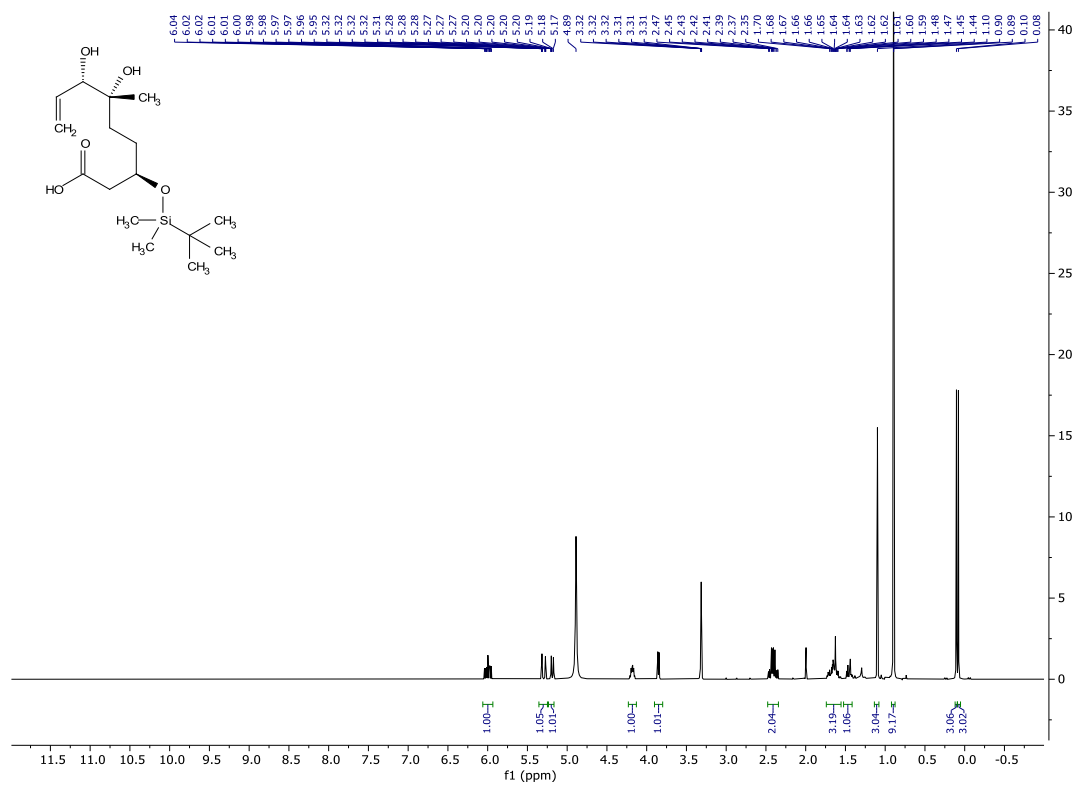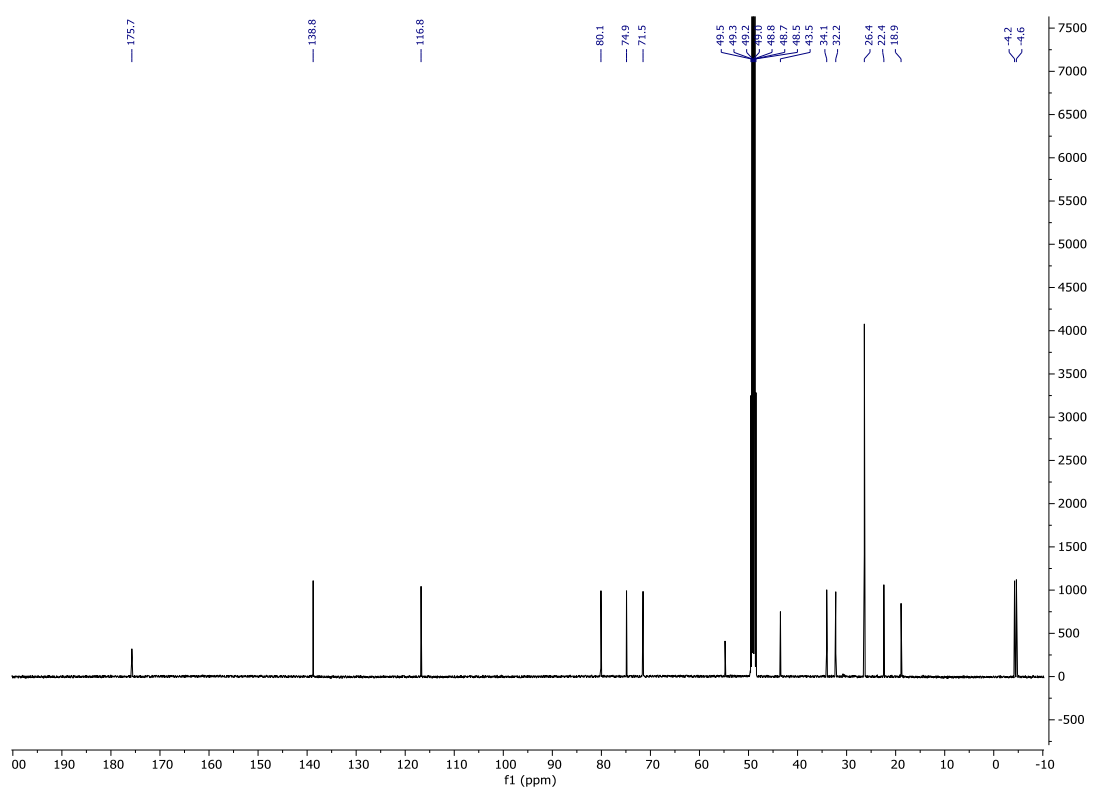

## Substrate for Ring Closing Metathesis (5)

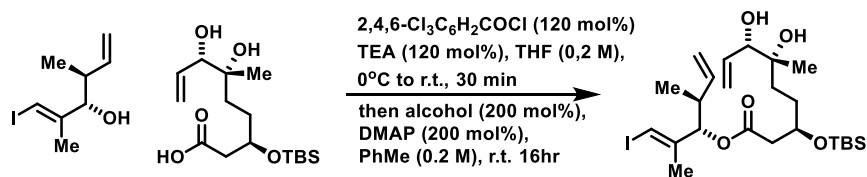

To a stirred solution of **Fragment C** (0.13 g, 0.4 mmol) in dry THF (1.9 mL, 0.2M) at 0 °C was added triethylamine (46  $\mu$ L, 0.48 mmol, 120 mol%) followed by 2,4,6-trichlorobenzoyl chloride (75  $\mu$ L, 0.48 mmol, 120 mol%). The mixture was allowed to stir for 30 min at room temperature. A solution of DMAP (98 mg, 0.8 mmol, 200 mol%) and **Fragment D** (0.20 g, 0.8 mmol, 200 mol%) in toluene was added and the reaction mixture was allowed to stir at room temperature for 16 h. The reaction mixture was directly deposited onto a column of silica gel and subjected to flash chromatography (SiO<sub>2</sub>: 7:3 hexanes/ethyl acetate) to furnish the title compound (0.12 g, 0.21 mmol) in 53% yield as a colorless oil along with recovered **Fragment D**.

**TLC** (SiO<sub>2</sub>): R<sub>f</sub> = 0.50 (hexanes/ethyl acetate = 3:1).

**<sup>1</sup>H NMR** (400 MHz, CDCl<sub>3</sub>):  $\delta$  6.33 (s, 1H), 5.92 (ddd,  $J$  = 17.1, 10.5, 6.5 Hz, 1H), 5.71 – 5.60 (m, 1H), 5.31 (d,  $J$  = 8.3 Hz, 1H), 5.25 (d,  $J$  = 10.5 Hz, 1H), 5.13 (d,  $J$  = 8.2 Hz, 1H), 5.08 – 4.97 (m, 2H), 4.08 (t,  $J$  = 5.9 Hz, 1H), 3.94 (d,  $J$  = 6.2 Hz, 1H), 2.52 – 2.41 (m, 3H), 1.81 (d,  $J$  = 1.1 Hz, 3H), 1.67 (dd,  $J$  = 11.8, 4.2 Hz, 1H), 1.59 (dd,  $J$  = 8.2, 2.6 Hz, 2H), 1.36 – 1.30 (m, 1H), 1.16 (s, 3H), 0.92 (d,  $J$  = 6.8 Hz, 3H), 0.87 (s, 9H), 0.06 (s, 3H), 0.05 (d,  $J$  = 3.8 Hz, 3H).

**<sup>13</sup>C NMR** (125 MHz, CDCl<sub>3</sub>):  $\delta$  170.5, 144.5, 139.4, 136.7, 117.7, 116.0, 81.9, 80.6, 79.7, 74.0, 69.5, 42.7, 40.3, 31.8, 30.7, 26.0, 23.5, 20.4, 18.2, 16.6, -4.4, -4.5.

**HRMS** (ESI) calcd. for C<sub>24</sub>H<sub>43</sub>IO<sub>5</sub>Si [M+Na]<sup>+</sup> : 589.1817, found 589.1827.

**FTIR** (neat): 3511, 3417, 2953, 2929, 2856, 1737, 1462, 1376, 1251, 1168, 1094, 994, 920, 833, 775, 739, 701, 684, 664 cm<sup>-1</sup>.

**[ $\alpha$ ]<sup>26</sup><sub>D</sub>**: -32.0 (*c* 1.0, CHCl<sub>3</sub>).



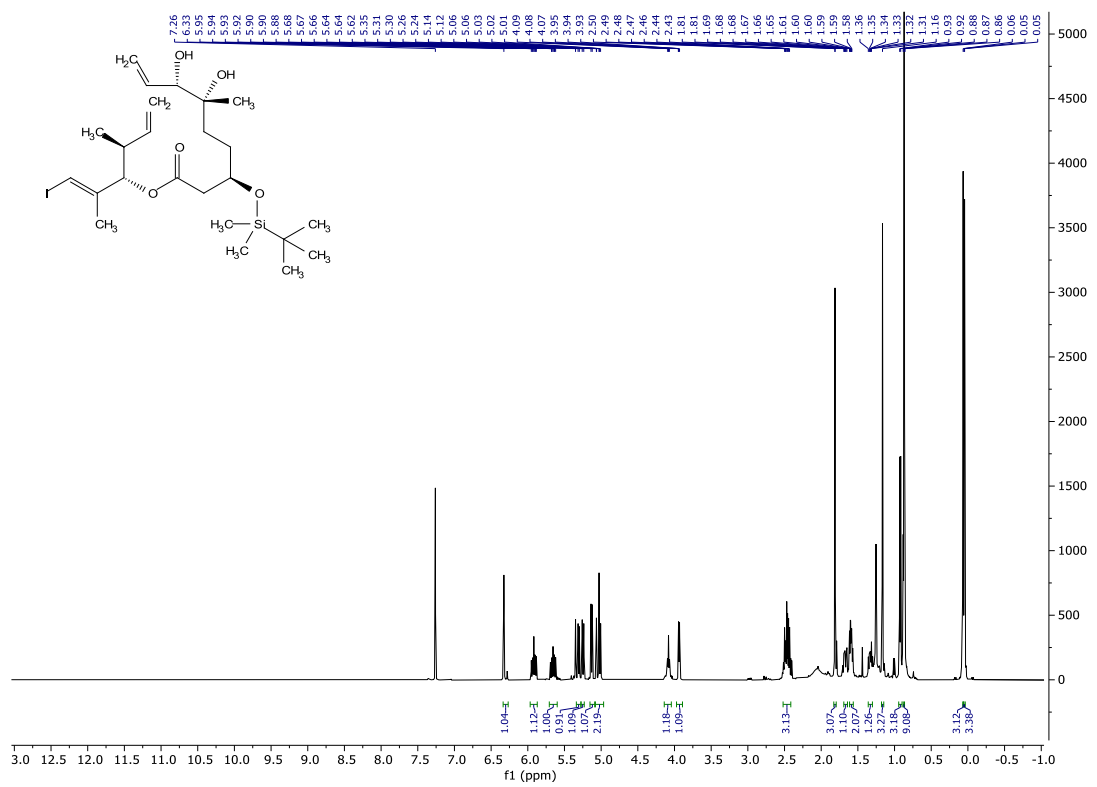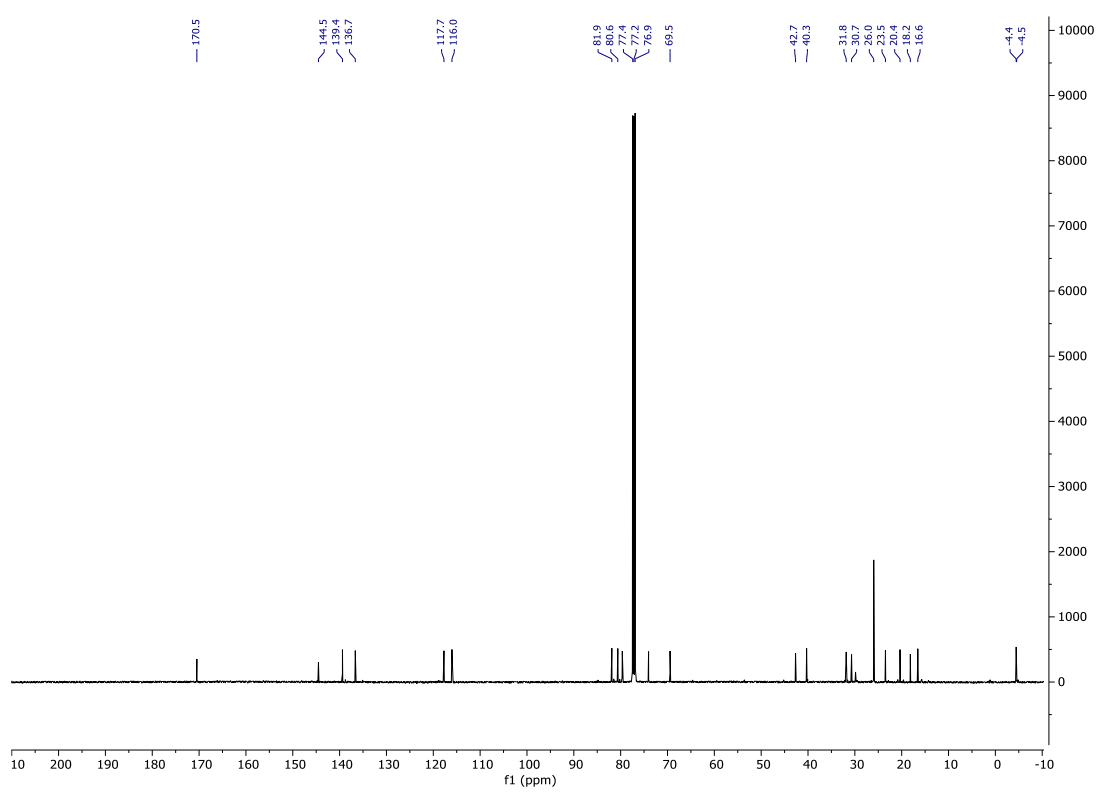

## Macrolactone *en route* to Fragment A

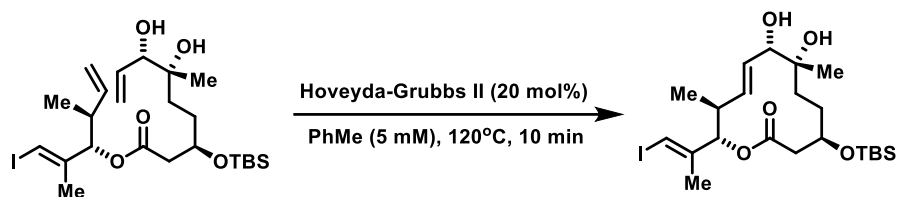

To a solution of diol **5** (28 mg, 49  $\mu\text{mol}$ ) in degassed toluene (8mL) was added Hoveyda-Grubbs 2<sup>nd</sup> generation catalyst (6.2 mg, 9.8  $\mu\text{mol}$ , 20 mol%) in degassed toluene (2 mL) over 1 min at 120 °C. The mixture was allowed to stir for 10 min and cooled immediately to 0 °C by use of an ice bath. The reaction mixture was concentrated *in vacuo*, directly deposited on a column of silica gel and subjected to flash chromatography (SiO<sub>2</sub>: 7:3 hexanes/ethyl acetate) to furnish the title compound (13.5 mg, 25  $\mu\text{mol}$ ) in 51% yield as a colorless oil.

**TLC** (SiO<sub>2</sub>): R<sub>f</sub>= 0.34 (hexanes/ethyl acetate = 3:2).

**<sup>1</sup>H NMR** (400 MHz, CDCl<sub>3</sub>):  $\delta$  6.45 (s, 1H), 5.72 (dd,  $J = 15.1, 9.7$  Hz, 1H), 5.43 (dd,  $J = 15.2, 9.9$  Hz, 1H), 5.11 (d,  $J = 10.7$  Hz, 1H), 3.83 (q,  $J = 4.1$  Hz, 1H), 3.79 (d,  $J = 9.8$  Hz, 1H), 2.55 – 2.36 (m, 4H), 1.79 (d,  $J = 1.2$  Hz, 3H), 1.59 (s, 1H), 1.45 – 1.37 (m, 3H), 1.29 (s, 3H), 0.90 (d,  $J = 5.3$  Hz, 12H), 0.08 (s, 3H), 0.06 (s, 3H).

**<sup>13</sup>C NMR** (101 MHz, CDCl<sub>3</sub>):  $\delta$  168.8, 143.9, 137.1, 130.3, 83.8, 80.3, 77.4, 73.7, 70.7, 40.6, 40.6, 36.1, 30.4, 26.0, 24.4, 19.2, 18.3, 16.6, -4.7.

**HRMS** (ESI) calcd. for C<sub>22</sub>H<sub>39</sub>IO<sub>5</sub>Si [M+Na]<sup>+</sup> : 561.1504 found 561.1513.

**FTIR** (neat): 3415, 2953, 2928, 2856, 1738, 1462, 1252, 1166, 1085, 979, 810, 775, 753, 667 cm<sup>-1</sup>.

**[ $\alpha$ ]<sup>26</sup><sub>D</sub>**: -11.5 ( $c$  0.1, CHCl<sub>3</sub>).

The spectral data were identical to that previously reported.<sup>1</sup>

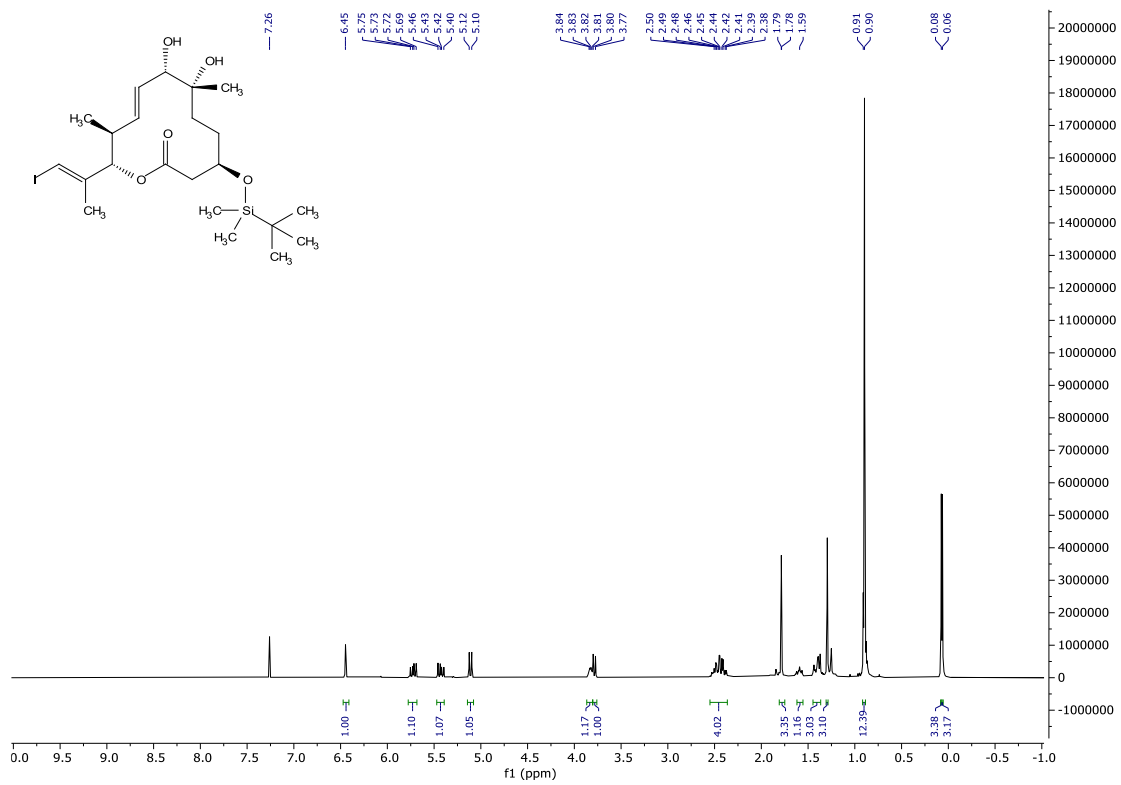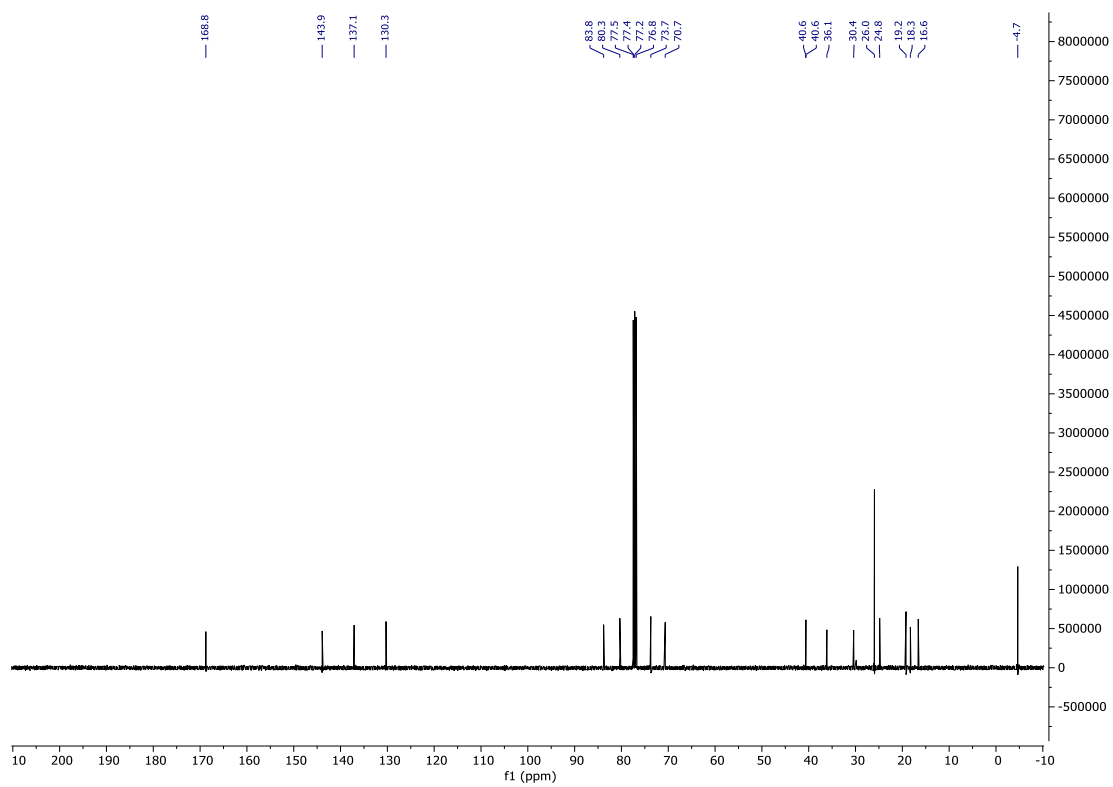

## RCM Byproduct (9)

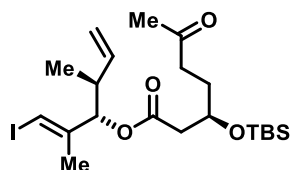

**TLC** (SiO<sub>2</sub>): R<sub>f</sub> = 0.56 (hexanes/ethyl acetate = 4:1).

**<sup>1</sup>H NMR** (400 MHz, CDCl<sub>3</sub>): δ 6.38 – 6.30 (m, 1H), 5.70 – 5.59 (m, 1H), 5.17 – 4.97 (m, 3H), 4.18 – 4.05 (m, 1H), 2.56 – 2.37 (m, 5H), 2.14 (s, 3H), 1.86 – 1.67 (m, 5H), 0.95 – 0.89 (m, 3H), 0.86 (s, 9H), 0.07 – 0.03 (m, 6H).

**<sup>13</sup>C NMR** (100 MHz, CDCl<sub>3</sub>): δ 208.4, 170.2, 144.5, 139.4, 116.0, 82.0, 80.7, 68.2, 42.6, 40.3, 39.1, 31.0, 30.1, 25.9, 20.3, 18.1, 16.6, -4.6.

**HRMS** (ESI) calcd. for C<sub>21</sub>H<sub>37</sub>IO<sub>4</sub>Si [M+Na]<sup>+</sup> : 531.1403, found 531.1403.

**FTIR** (neat): 2954, 2928, 1736, 1718, 1251, 1089, 994, 834, 776, 683 cm<sup>-1</sup>.

**[α]<sub>D</sub><sup>26</sup>**: -26.5 (*c* 1.0, CHCl<sub>3</sub>).



## Fragment A

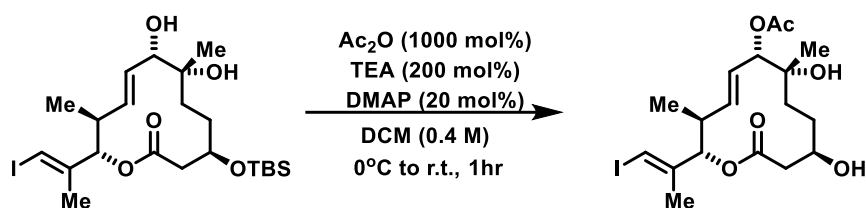

To a solution of alcohol diol (13.5 mg, 25  $\mu\text{mol}$ , 100 mol%) in  $\text{CH}_2\text{Cl}_2$  (63  $\mu\text{L}$ , 0.4 M) was added triethylamine (7  $\mu\text{L}$ , 50  $\mu\text{mol}$ , 200 mol%) and DMAP (0.6 mg, 5  $\mu\text{mol}$ , 20 mol%). The reaction mixture was cooled to 0 °C. Acetic anhydride (23  $\mu\text{L}$ , 250  $\mu\text{mol}$ , 1000 mol%) was added and the reaction mixture was allowed to stir at 0 °C for 1 hr. HCl aq (1.5 N) was added and the reaction mixture was allowed to stir at room temperature for 3 h. Water was added and the biphasic mixture was transferred to a separatory funnel. The aqueous phase was extracted with ethyl acetate. The combined organic layers were dried ( $\text{Na}_2\text{SO}_4$ ), filtered and concentrated *in vacuo*. The residue was subjected to flash chromatography ( $\text{SiO}_2$ : 5:1 hexanes/ethyl acetate) to furnish the title compound (7.8 mg, 18  $\mu\text{mol}$ ) in 67% yield as a colorless oil.

**TLC** ( $\text{SiO}_2$ )  $R_f$  = 0.21 (hexanes/ethyl acetate = 3:2).

**$^1\text{H}$  NMR** (400 MHz,  $\text{CDCl}_3$ )  $\delta$  6.48 (s, 1H), 5.68 (dd,  $J$  = 15.2, 9.5 Hz, 1H), 5.58 (dd,  $J$  = 15.2, 9.6 Hz, 1H), 5.30 (d,  $J$  = 10.7 Hz, 1H), 5.06 (d,  $J$  = 9.5 Hz, 1H), 3.76 (dd,  $J$  = 11.0, 3.5 Hz, 1H), 2.68 – 2.46 (m, 3H), 2.09 (s, 3H), 1.82 (d,  $J$  = 1.1 Hz, 3H), 1.74 – 1.65 (m, 1H), 1.52 (d,  $J$  = 3.2 Hz, 1H), 1.38 (td,  $J$  = 13.1, 12.3, 4.0 Hz, 2H), 1.21 (s, 3H), 0.90 (d,  $J$  = 6.8 Hz, 3H).

**$^{13}\text{C}$  NMR** (101 MHz,  $\text{CDCl}_3$ )  $\delta$  171.9, 169.7, 143.5, 139.8, 126.3, 84.3, 80.4, 78.9, 73.5, 69.3, 41.1, 38.4, 35.3, 29.9, 24.8, 21.4, 19.2, 16.4.

**HRMS** (ESI) Calcd. for  $\text{C}_{18}\text{H}_{27}\text{IO}_6$   $[\text{M}+\text{Na}]^+$  : 489.0750, found 489.0741

**FTIR** (neat): 3454, 2958, 2926, 1732, 1456, 1368, 1239, 1167, 1102, 1050, 1021, 979, 912, 735, 674  $\text{cm}^{-1}$ .

**$[\alpha]^{26}_D$** : -39.0 (*c* 0.5,  $\text{CHCl}_3$ ).

The spectral data were identical to that previously reported.<sup>1</sup>



**(E)-3-Iodo-2-methylprop-2-en-1-ol (10)**

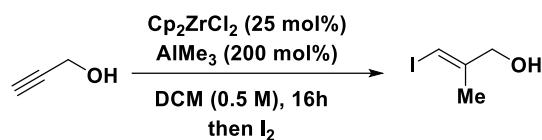

To an oven-dried 500 mL Schlenk flask charged with  $\text{Cp}_2\text{ZrCl}_2$  (3.9 g, 13.4 mmol, 25 mol%) and dry  $\text{CH}_2\text{Cl}_2$  (100 mL) was added  $\text{AlMe}_3$  (2 M in heptane, 106 mmol, 200 mol%). The reaction mixture was allowed to cool to 0 °C. Propargyl alcohol (3.1 mL, 54 mmol, 100 mol%) in  $\text{CH}_2\text{Cl}_2$  (40 mL) was added dropwise over 30 min and the reaction mixture was allowed to stir for 16 hr at room temperature. The mixture was placed to -30°C bath and iodine (16.3 g, 64 mmol, 120 mol%) in THF (50 mL) was added. The reaction mixture was allowed to stir for 10 min. The saturated solution of  $\text{NaHCO}_3$  aq was carefully added and the mixture was allowed to warm to room temperature. The biphasic mixture was transferred to a separatory funnel and the aqueous phase was extracted with ethyl acetate. The combined organic layers were dried ( $\text{Na}_2\text{SO}_4$ ), filtered and concentrated *in vacuo*. The resulting oil was subjected to flash chromatography ( $\text{SiO}_2$ : 3:2 hexanes/ethyl acetate) to furnish the title compound (5.6 g, 28 mmol) in 53% yield as a colorless oil.

**TLC** ( $\text{SiO}_2$ ):  $R_f = 0.25$  (hexanes/diethyl ether = 7:3).

**$^1\text{H NMR}$**  (400 MHz,  $\text{CDCl}_3$ )  $\delta$  6.29, 4.14, 1.89.

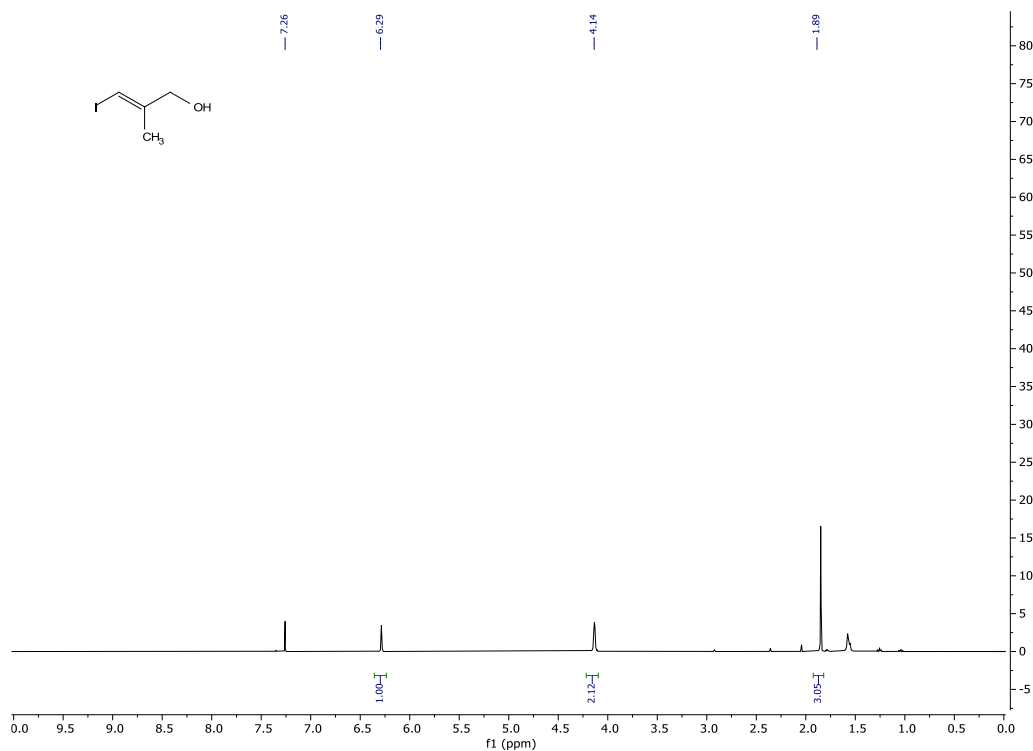

The spectral data were identical to those reported.<sup>2</sup>



**(E)-(3S, 4S)-1-Iodo-2, 4-dimethylhexa-1, 5-dien-3-ol (Fragment D)**

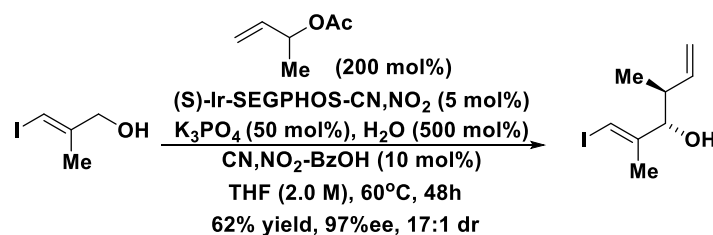

To an oven-dried sealed tube equipped with a magnetic stir bar was placed under an atmosphere of argon was charged with (*E*)-3-iodo-2-methylprop-2-en-1-ol **10** (22  $\mu$ L, 0.2 mmol, 100 mol %) in THF (0.1 mL, 2.0 M). (*S*)-SEGPHOS-Ir-CN, NO<sub>2</sub> (10.3 mg, 0.01 mmol, 5 mol %), K<sub>3</sub>PO<sub>4</sub> (21.5 mg, 0.10 mmol, 50 mol %), H<sub>2</sub>O (18  $\mu$ L, 1.0 mmol, 500 mol %) and but-3-en-2-ylacetate **1** (45.6 mg, 0.40 mmol, 200 mol %) were added. The reaction vessel was sealed and the reaction mixture was allowed to stir at 60 °C for 48 hr. The reaction mixture was concentrated *in vacuo*. The resulting mixture was subjected to flash chromatography (SiO<sub>2</sub>; ethyl acetate/hexanes = 1: 20) to furnish the **Fragment D** (31 mg, 0.124 mmol) in 62% yield (17:1 dr, 97% ee).

**TLC** (SiO<sub>2</sub>): R<sub>f</sub> = 0.35 (hexanes/ethyl acetate = 20:1).

**<sup>1</sup>H NMR** (400 MHz, CDCl<sub>3</sub>):  $\delta$  6.26 (s, 1H), 5.78 – 5.66 (m, 1H), 5.21 – 5.18 (m, 1H), 5.16 (s, 1H), 3.87 (dd, *J* = 8.1, 0.7 Hz, 1H), 2.41 – 2.30 (m, 1H), 1.82 (d, *J* = 1.1 Hz, 3H), 0.92 (d, *J* = 6.8 Hz, 3H).

**<sup>13</sup>C NMR** (100 MHz, CDCl<sub>3</sub>):  $\delta$  148.0, 139.9, 117.2, 80.1, 42.2, 19.3, 16.5.

**HRMS** (ESI) calcd. for C<sub>8</sub>H<sub>13</sub>IO [M+Na]<sup>+</sup> : 274.9909, found 274.9918.

**HPLC**: Enantiomeric excess was determined by HPLC analysis of the product (Chiralcel OJ-H column, hexanes: *i*-PrOH = 97:3, 1.0 mL/min, 210 nm), *t*<sub>minor</sub> = 6.12 min, *t*<sub>major</sub> = 6.46 min; *ee* = 97%.

The spectroscopic properties of this compound were consistent with the data available in literature.<sup>3</sup>

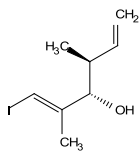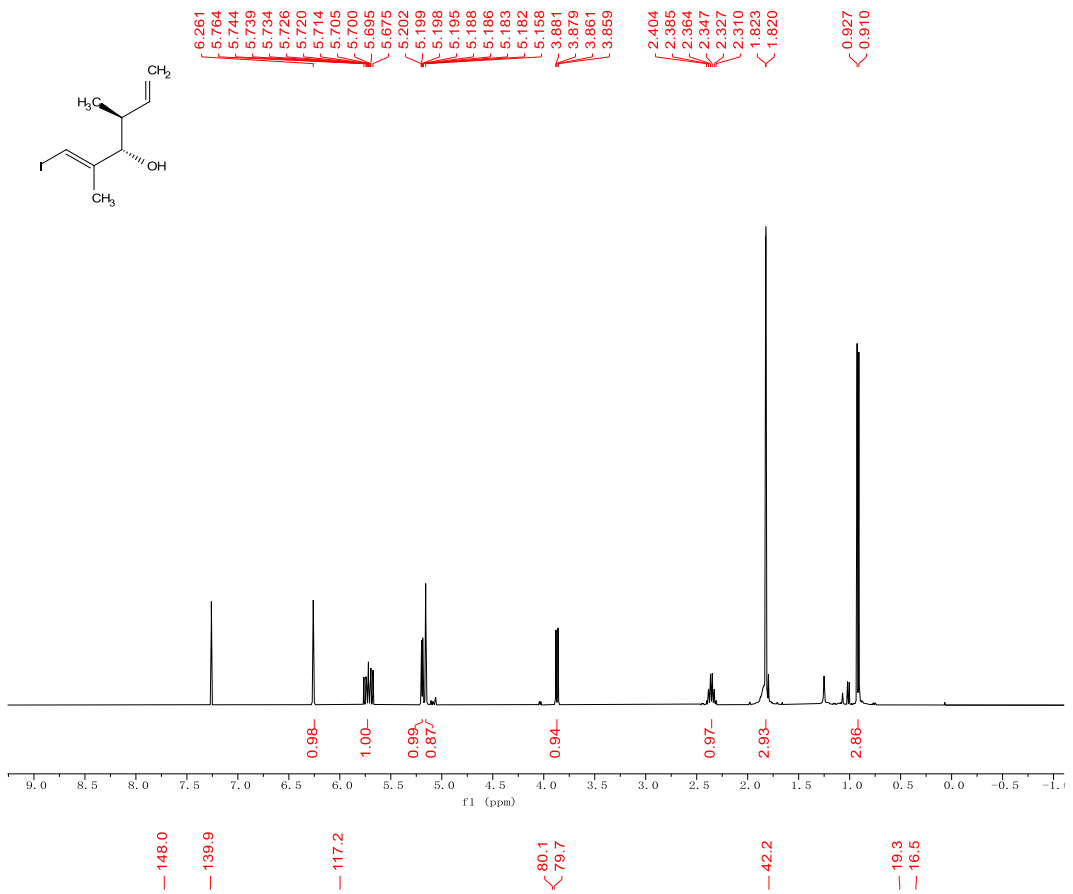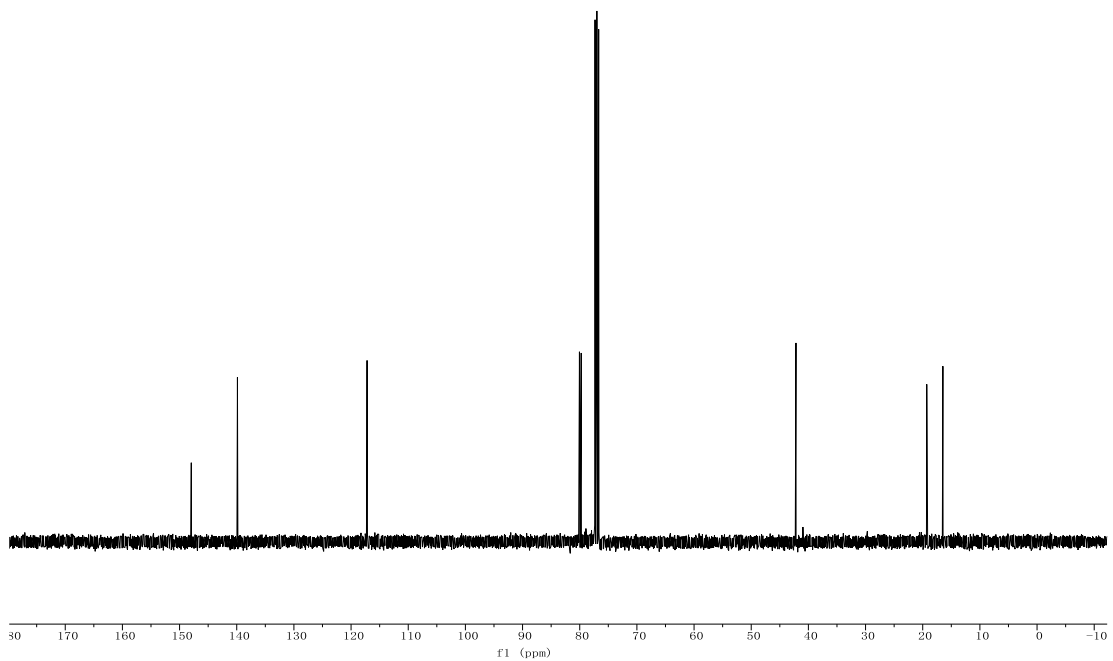

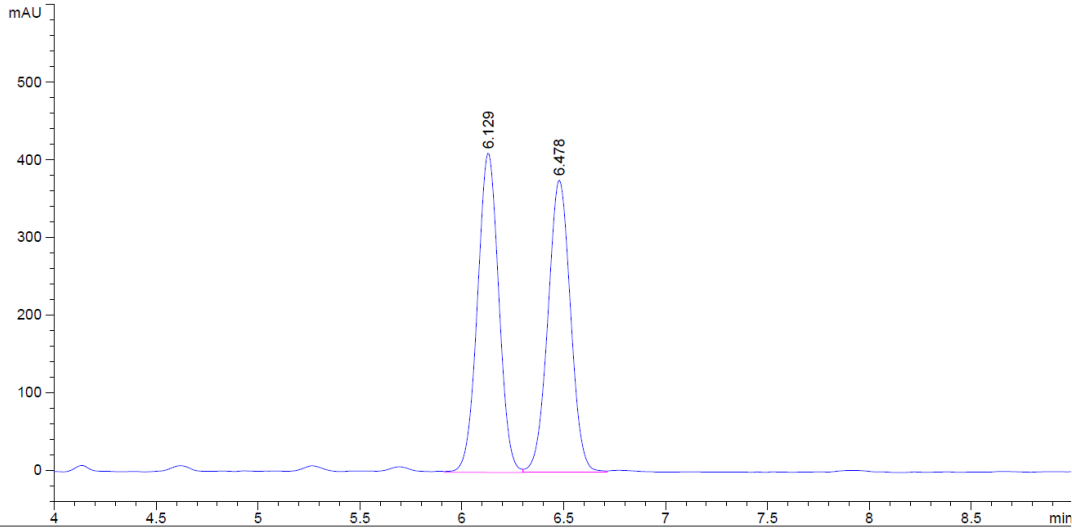

| Peak # | RetTime [min] | Type | Width [min] | Area [mAU*s] | Height [mAU] | Area %  |
|--------|---------------|------|-------------|--------------|--------------|---------|
| 1      | 6.129         | VV   | 0.1126      | 2985.81055   | 411.72641    | 50.6700 |
| 2      | 6.478         | VV   | 0.1200      | 2906.84863   | 376.65897    | 49.3300 |

Totals : 5892.65918 788.38538

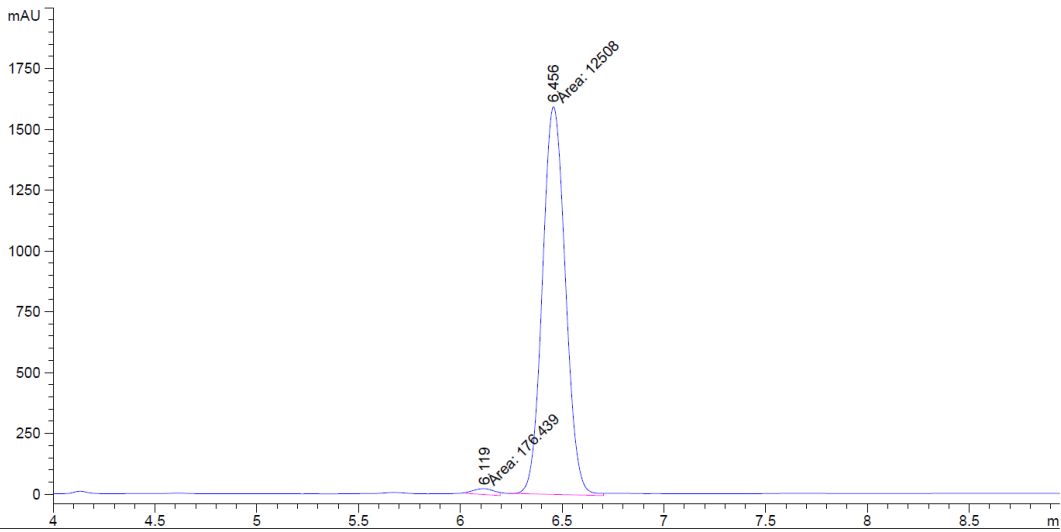

| Peak # | RetTime [min] | Type | Width [min] | Area [mAU*s] | Height [mAU] | Area %  |
|--------|---------------|------|-------------|--------------|--------------|---------|
| 1      | 6.119         | MM   | 0.1210      | 176.43901    | 24.30532     | 1.3910  |
| 2      | 6.456         | MM   | 0.1306      | 1.25080e4    | 1595.84363   | 98.6090 |

Totals : 1.26844e4 1620.14895

### 3-(triisopropylsilyl)propionaldehyde (12)

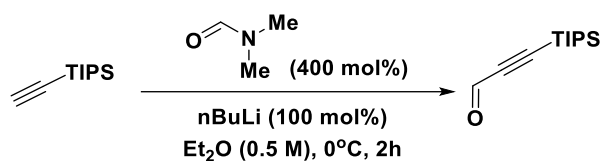

To a round-bottomed flask under an argon atmosphere charged with ethynyltriisopropylsilane (1.16 mL, 5.00 mmol, 100 mol%) was added anhydrous Et<sub>2</sub>O (5 mL). The solution was cooled to 0 °C and n-butyllithium (2.00 mL, 5.00 mmol, 100 mol %) was slowly added. The reaction mixture was allowed to stir for 30 min and dimethylformamide (1.55 mL, 20.0 mmol, 400 mol %) in anhydrous Et<sub>2</sub>O (5 mL) was added dropwise. The reaction mixture was allowed to stir for 1 hr. HCl aq (1.0 N) was carefully added and the biphasic mixture was transferred to a separatory funnel. The aqueous phase was extracted with ethyl acetate. The combined organic layers were dried (Na<sub>2</sub>SO<sub>4</sub>), filtered and concentrated *in vacuo*. The resulting oil was subjected to flash chromatography (SiO<sub>2</sub>: 15:1 hexanes:ethyl acetate) to furnish the title compound (1049 mg, 4.986 mmol) in 99% yield as a colorless oil.

**TLC** (SiO<sub>2</sub>) R<sub>f</sub> = 0.58 (hexanes/ethyl acetate = 20:1).

**<sup>1</sup>H NMR** (400 MHz, CDCl<sub>3</sub>) δ 9.20 (s, 1H), 1.13 – 1.09 (m, 21H).

**<sup>13</sup>C NMR** (101 MHz, CDCl<sub>3</sub>) δ 176.7, 104.6, 100.9, 18.6, 11.1.

The spectral data were identical to those reported.<sup>4</sup>

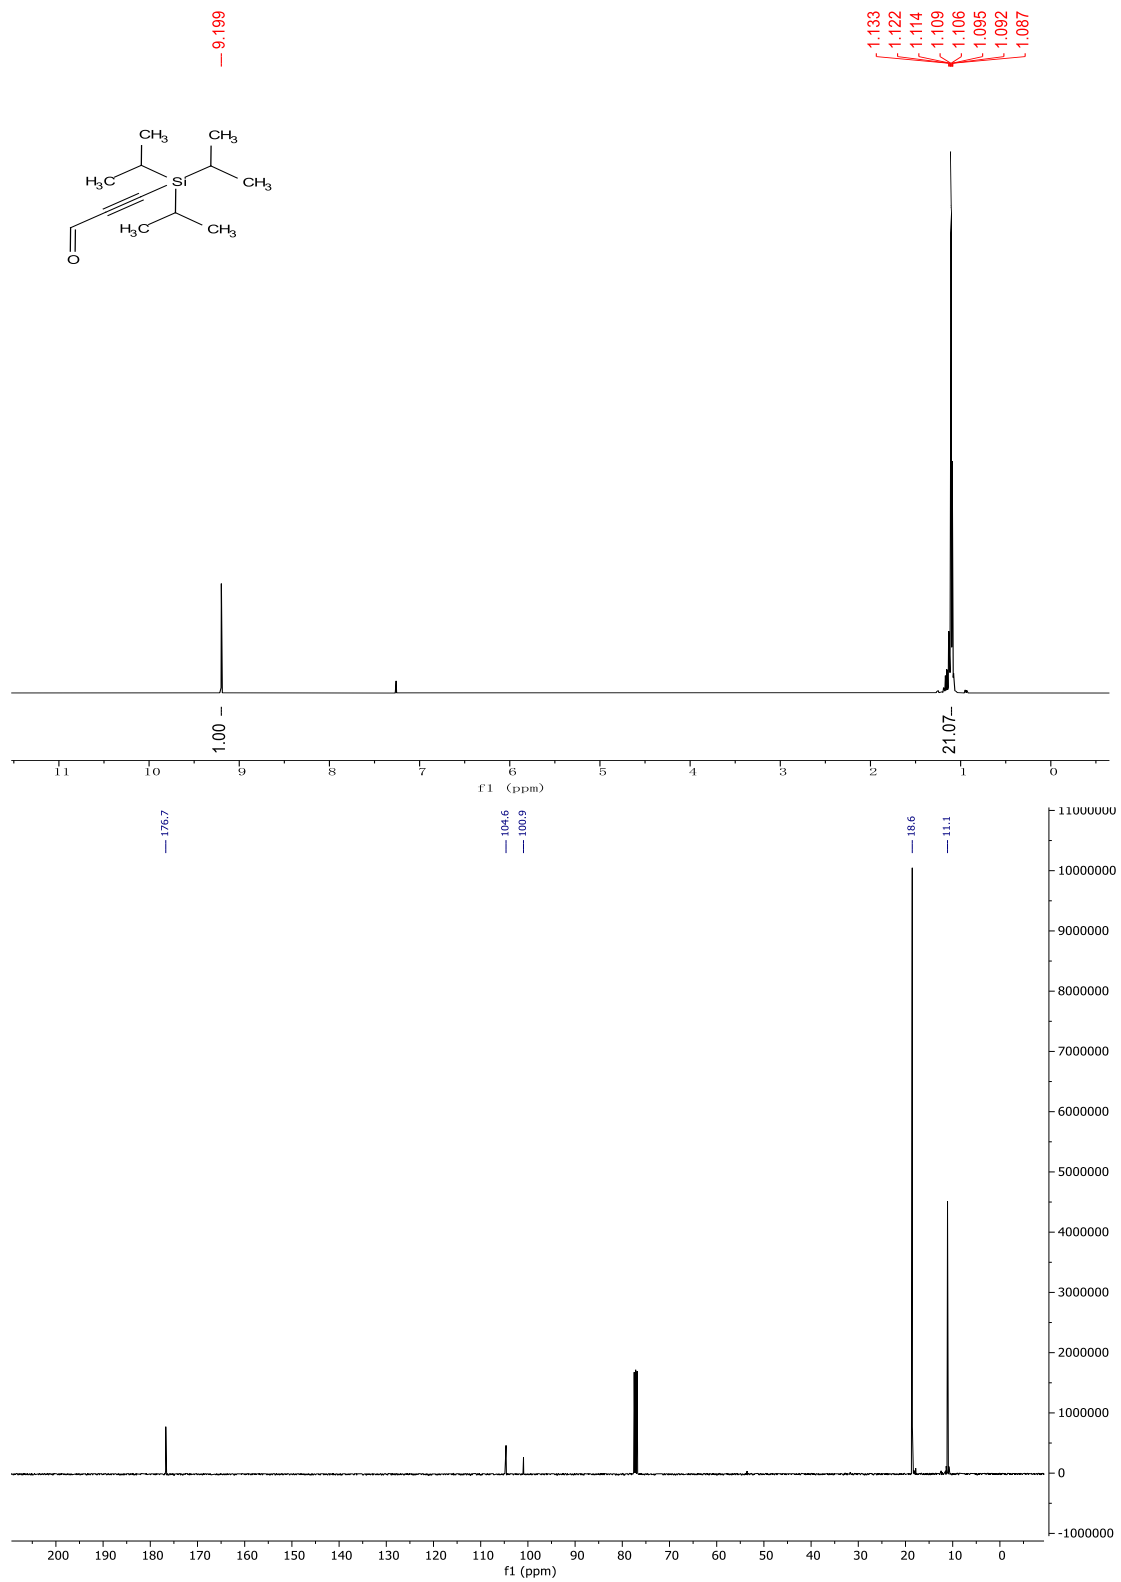

**(R)-1-(Triisopropylsilyl)hex-5-en-1-yn-3-ol (13)**

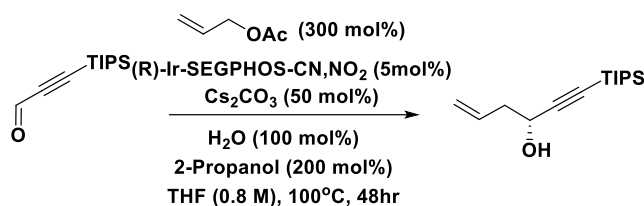

To an oven-dried pressure tube equipped with a magnetic stir bar was placed under an atmosphere of argon was charged with Cs<sub>2</sub>CO<sub>3</sub> (33 mg, 0.10 mmol, 50 mol %) and (R)-SEGPHOS-Ir-CN, NO<sub>2</sub> (10.3 mg, 0.01 mmol, 5 mol %) in THF (0.25 mL, 0.8 M). 2-propanol (0.031 mL, 0.40 mmol, 200 mol %), allyl acetate (0.065 mL, 0.60 mmol, 300 mol %), water (0.0036 mL, 0.20 mmol, 100 mol %) and aldehyde **12** (0.047 mL, 0.2 mmol, 100 mol %) were added. The reaction vessel was sealed and the reaction mixture was allowed to stir at 100 °C for 48 hr. The reaction mixture was concentrated *in vacuo*. The resulting mixture was subjected to flash chromatography (SiO<sub>2</sub>: 20:1 hexanes/ethyl acetate) to furnish the title compound in 73 % yield (36.8 mg, 0.146 mmol) as a pale oil.

**TLC** (SiO<sub>2</sub>) R<sub>f</sub> = 0.29 (hexanes/ethyl acetate = 20:1).

**<sup>1</sup>H NMR** (400 MHz, CDCl<sub>3</sub>): δ 5.99 – 5.84 (m, 1H), 5.25 – 5.14 (m, 2H), 4.44 (t, *J* = 6.0 Hz, 1H), 2.49 (dq, *J* = 4.5, 1.5 Hz, 2H), 1.07 (d, *J* = 2.5 Hz, 21H).

**HRMS** (EI) *m/z*: calcd for C<sub>15</sub>H<sub>28</sub>OSi [M<sup>+</sup>] 252.1909, found 252.1894.

**[α]<sup>26</sup><sub>D</sub>**: +26.2 (*c* 1.0, CHCl<sub>3</sub>); Lit.(**ent-13**)<sup>4</sup> **[α]<sup>26</sup><sub>D</sub>**: -26.1 (*c* 1.0, CHCl<sub>3</sub>).

The spectral data were identical to those reported.<sup>4</sup>

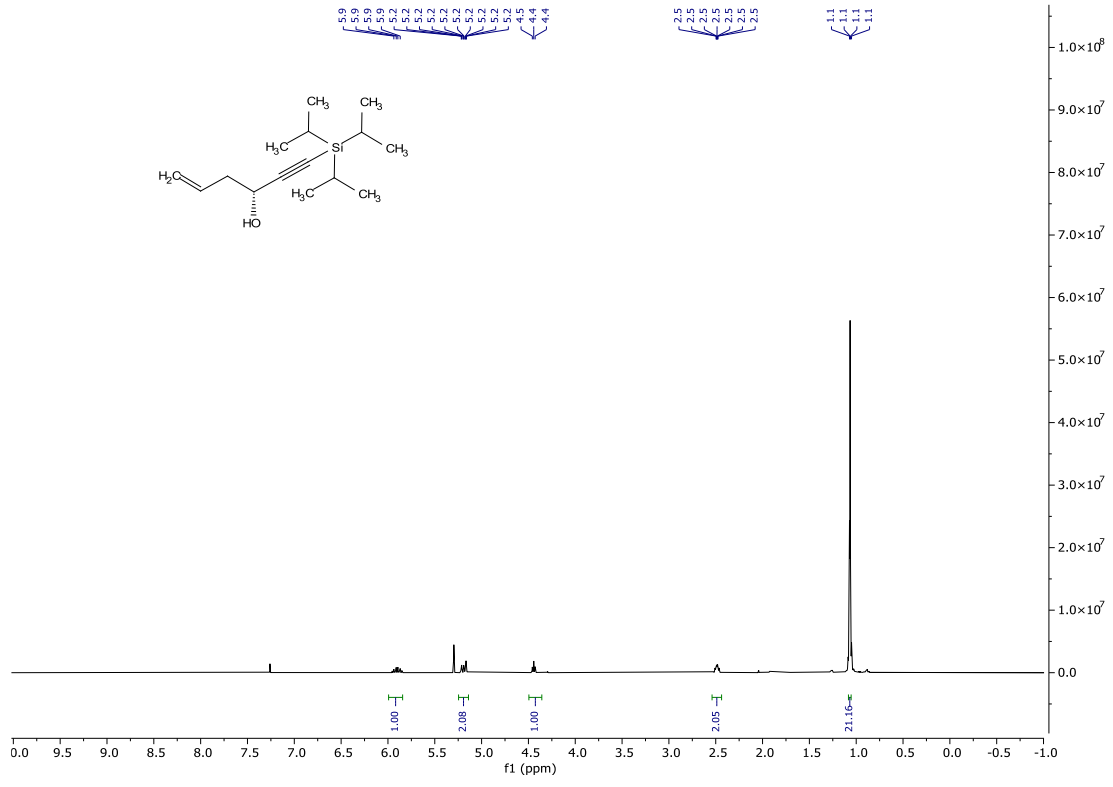

**(R)-Methyl [1-(triisopropylsilyl) hex-5-en-1-yn-3-yl carbonate**

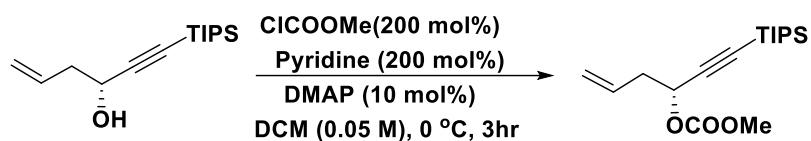

To a solution of (R)-1-(triisopropylsilyl) hex-5-en-1-yn-3-ol **13** (0.25 g, 1.0 mmol, 100 mol %) in CH<sub>2</sub>Cl<sub>2</sub> (20 mL) was added pyridine (0.16 mL, 2.0 mmol, 200 mol %) and DMAP (12.2 mg, 0.1 mmol, 10 mol %). Methyl chloroformate (0.15 mL, 2 mmol, 200 mol %) in CH<sub>2</sub>Cl<sub>2</sub> (2 mL) was slowly added at 0 °C. The reaction mixture was allowed to stir for 3 hr. HCl aq (0.3 N) was carefully added and the biphasic mixture was transferred to a separatory funnel. The aqueous phase was extracted with ethyl acetate. The combined organic layers were dried (Na<sub>2</sub>SO<sub>4</sub>), filtered and concentrated *in vacuo*. The resulting oil was subjected to flash chromatography (SiO<sub>2</sub>: 10:1 hexanes:ethyl acetate) to furnish the title compound (280 mg, 0.9 mmol) in 90% yield as a colorless oil.

**TLC** (SiO<sub>2</sub>): R<sub>f</sub> = 0.4 (hexanes/ethyl acetate = 20:1).

**<sup>1</sup>H NMR** (400 MHz, CDCl<sub>3</sub>): δ 5.84 (ddt, *J* = 17.2, 10.2, 7.0 Hz, 1H), 5.28 (t, *J* = 6.5 Hz, 1H), 5.23 – 5.11 (m, 2H), 3.79 (s, 3H), 2.58 (t, *J* = 6.7 Hz, 2H), 1.06 (s, 21H).

**<sup>13</sup>C NMR** (101 MHz, CDCl<sub>3</sub>): δ 154.8, 131.9, 119.0, 103.2, 88.3, 67.8, 54.9, 39.5, 18.5, 11.0.

**HRMS** (ESI) calcd for C<sub>17</sub>H<sub>30</sub>O<sub>3</sub>Si [M+Na<sup>+</sup>]: 333.1856, found 333.1868.

**FTIR** (neat): 2944, 2866, 1751, 1441, 1254, 987, 882, 790, 676 cm<sup>-1</sup>.

**[α]<sub>D</sub><sup>26</sup>**: +21.4 (*c* 0.14, CHCl<sub>3</sub>).

**HPLC**: Enantiomeric excess was determined by HPLC analysis of the product (two Chiralcel AD-H columns, hexanes: *i*-PrOH = 99.5:0.5, 0.5 mL/min, 210 nm), *t*<sub>minor</sub> = 7.53 min, *t*<sub>major</sub> = 7.88 min; *ee* = 93%.



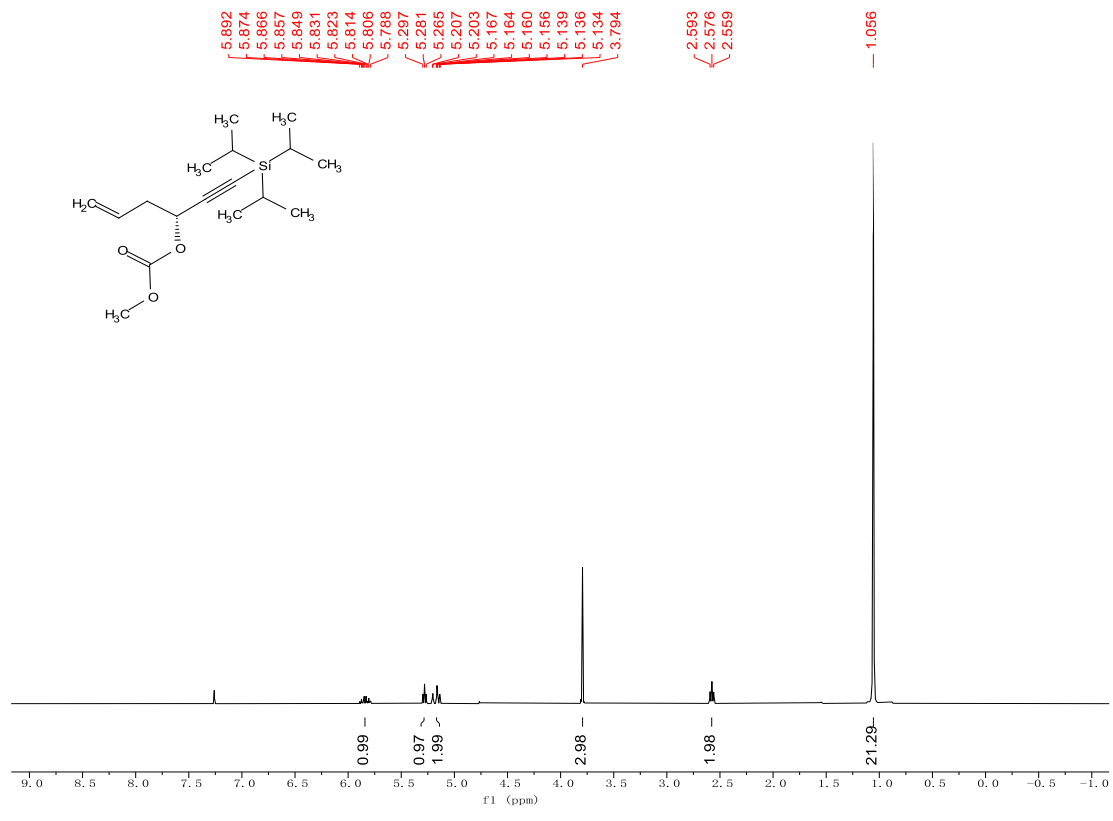

- 154.8
- 131.9
- 119.0
- 103.2
- 88.3
- 67.8
- 54.9
- 39.5
- 18.5
- 11.0

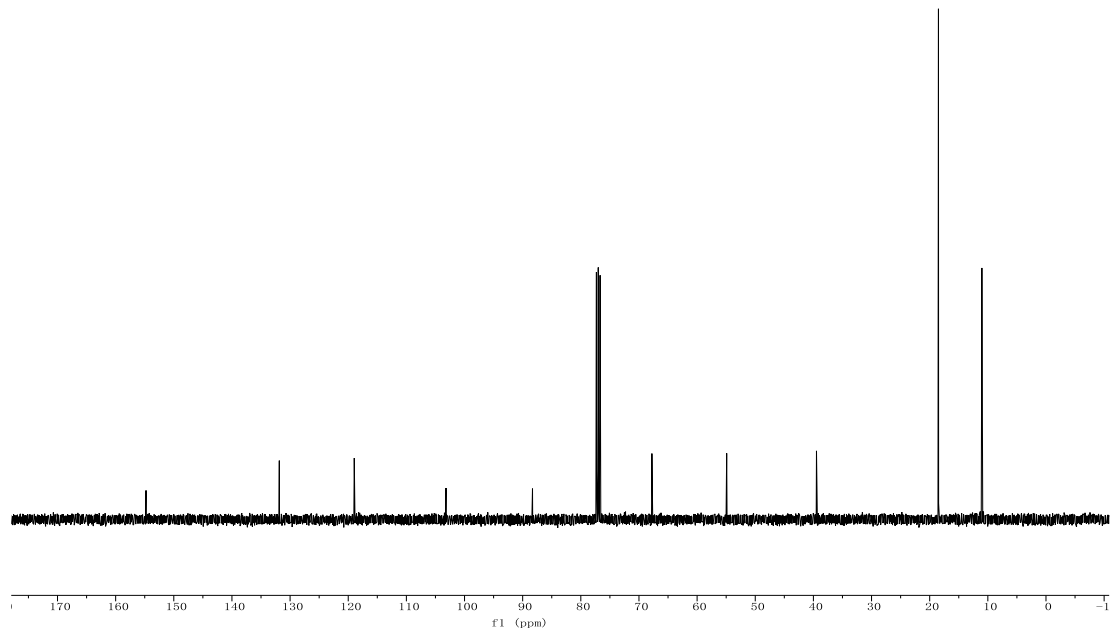

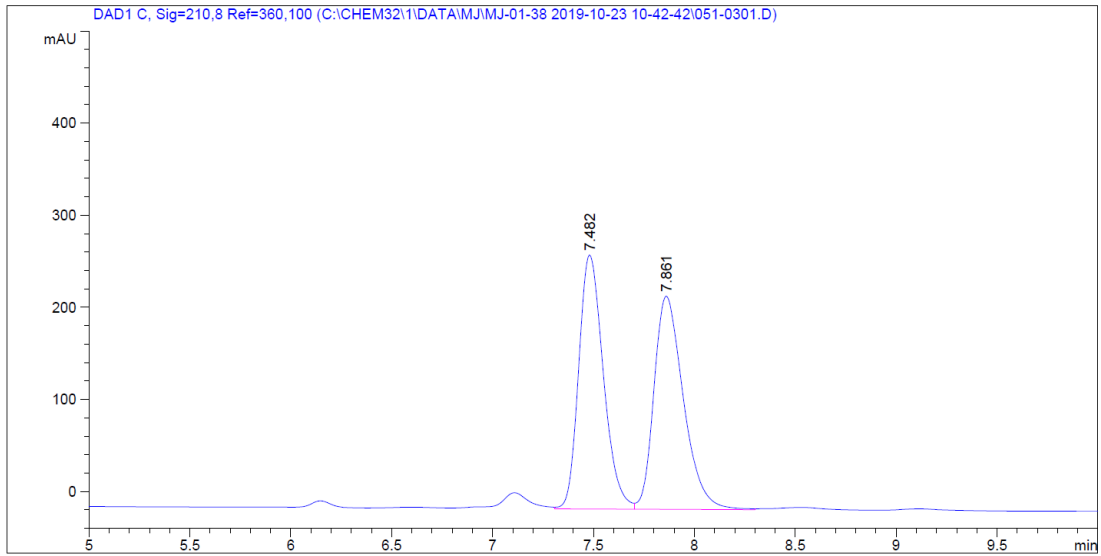

| Peak # | RetTime [min] | Type | Width [min] | Area [mAU*s] | Height [mAU] | Area %  |
|--------|---------------|------|-------------|--------------|--------------|---------|
| 1      | 7.482         | VV   | 0.1311      | 2343.83594   | 275.92154    | 49.9055 |
| 2      | 7.861         | VB   | 0.1565      | 2352.71460   | 231.54231    | 50.0945 |

Totals : 4696.55054 507.46385

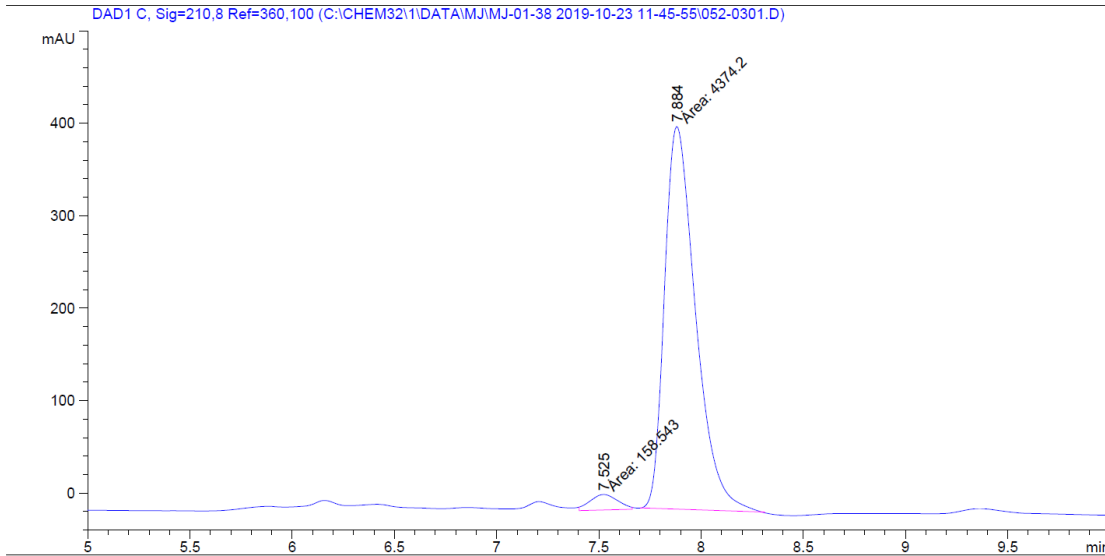

| Peak # | RetTime [min] | Type | Width [min] | Area [mAU*s] | Height [mAU] | Area %  |
|--------|---------------|------|-------------|--------------|--------------|---------|
| 1      | 7.525         | MM   | 0.1574      | 158.54300    | 16.78732     | 3.4977  |
| 2      | 7.884         | MM   | 0.1761      | 4374.19775   | 414.07422    | 96.5023 |

Totals : 4532.74075 430.86154

**(S)-Triisopropyl(3-methylhex-5-en-1-yn-1-yl) silane (Fragment F)**

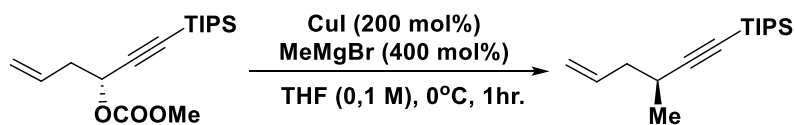

To a round-bottomed flask under an argon atmosphere charged with copper iodide (0.19 g, 1.0 mmol, 200 mol %) was added THF (4.0 mL). The suspension was allowed to cool to 0 °C, and MeMgBr (0.66 mL of a 3.0 M ethereal solution, 2.0 mmol, 400 mol %) was added via syringe. The reaction mixture was allowed to stir for 15 min. (*R*)-Methyl [1-(triisopropylsilyl) hex-5-en-1-yn-3-yl] carbonate (155 mg, 0.5 mmol, 100 mol %) in THF (1.0 mL) was slowly added. The reaction mixture was allowed to stir for 1 h at 0 °C. NH<sub>4</sub>Cl aq was added and the biphasic mixture was transferred to a separatory funnel. The aqueous phase was extracted with ethyl acetate. The combined organic layers were dried (Na<sub>2</sub>SO<sub>4</sub>), filtered and concentrated *in vacuo*. The resulting oil was subjected to flash chromatography (SiO<sub>2</sub>: hexanes) to furnish the title compound (97.7 mg, 0.39 mmol) in 78% yield as a colorless oil.

**TLC** (SiO<sub>2</sub>) R<sub>f</sub> = 0.9 (hexanes).

**<sup>1</sup>H NMR** (400 MHz, CDCl<sub>3</sub>) δ 5.88 (ddt, *J* = 17.2, 10.2, 7.0 Hz, 1H), 5.13 – 5.00 (m, 2H), 2.54 (h, *J* = 6.8 Hz, 1H), 2.21 (td, *J* = 6.9, 1.4 Hz, 2H), 1.18 (d, *J* = 6.9 Hz, 3H), 1.06 (d, *J* = 4.7 Hz, 21H).

**<sup>13</sup>C NMR** (101 MHz, CDCl<sub>3</sub>) δ 136.0, 116.5, 113.1, 41.3, 26.9, 20.8, 18.6, 11.3.

**HRMS** (ESI) *m/z*: [M-C<sub>3</sub>H<sub>7</sub>]<sup>+</sup> calcd for C<sub>16</sub>H<sub>30</sub>Si 207.1564, found 207.1570.

**FTIR** (neat): 2943, 2865, 2164, 1643, 1461, 1326, 1243, 1461, 1326, 994, 882, 660 cm<sup>-1</sup>.

**[α]<sub>D</sub><sup>26</sup>**: +12.0 (*c* 0.25, CHCl<sub>3</sub>).

**HPLC**: Enantiomeric excess was determined by HPLC analysis of the derivative of the product (two Chiralcel OD-H columns, hexanes:*i*-PrOH = 99:1, flow rate = 1.0 mL/min, λ = 210 nm), 19.1 min (minor enantiomer), 20.2 (major enantiomer), *ee* = 91%.

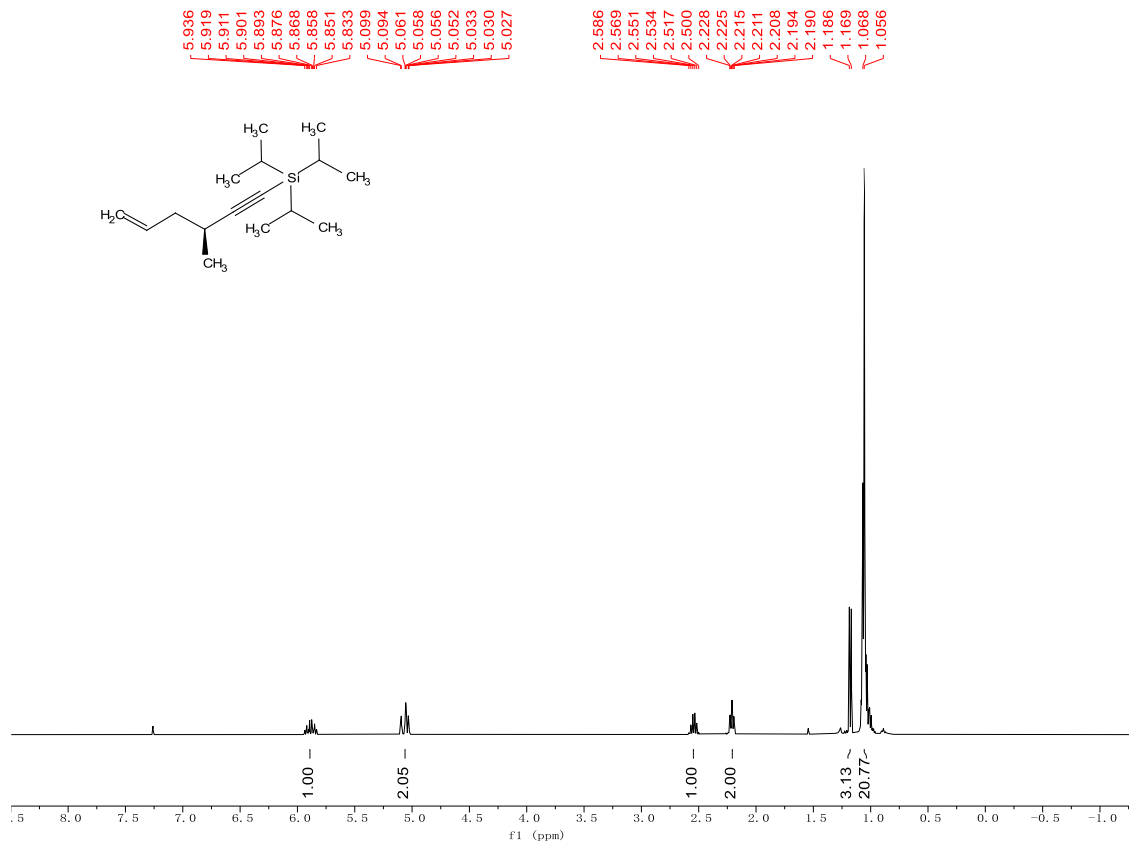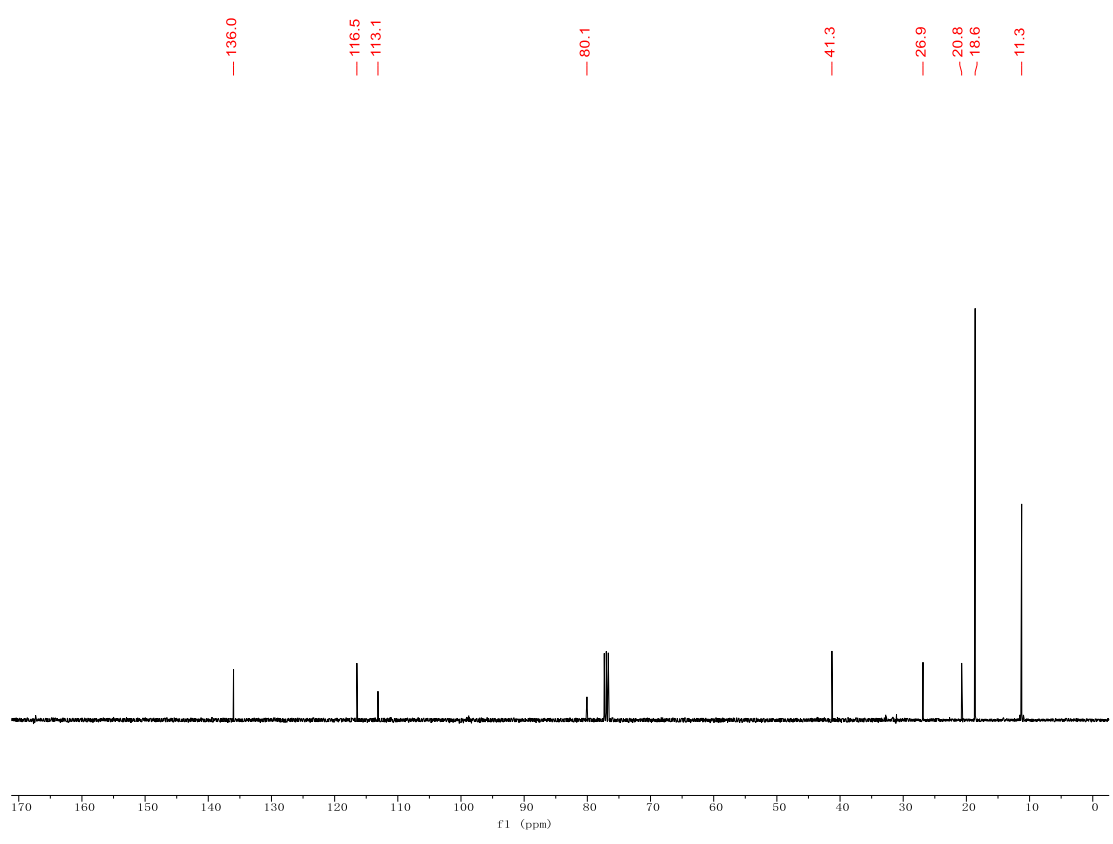

**(*S,E*)-6-Methyl-8-(triisopropylsilyl)oct-3-en-7-yn-1-ol**

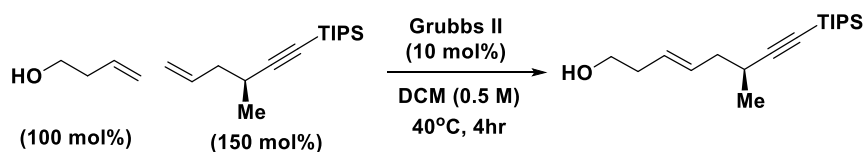

To a round-bottomed flask equipped with a magnetic stirring device under an argon atmosphere charged with second generation Grubbs's catalyst (8.5 mg, 0.01 mmol, 10 mol%) was added CH<sub>2</sub>Cl<sub>2</sub> (0.20 mL, 0.5 M). (*S*)-Tri-isopropyl (3-methylhex-5-en-1-yn-1-yl) silane (38 mg, 0.15 mmol, 150 mol%) and 3-buten-1-ol (8.5 L, 0.1 mmol, 100 mol%) were added. The reaction mixture was allowed to stir at 40 °C for 4 hr. The reaction was allowed to reach ambient temperature and was concentrated *in vacuo*. The resultant residue was subjected to flash column chromatography (SiO<sub>2</sub>: 5:1 hexanes/ethyl acetate) to furnish the title compound (25.7 mg, 0.087 mmol) in 87% yield as a colorless oil.

**TLC** (SiO<sub>2</sub>): R<sub>f</sub> = 0.27 (hexanes/ethyl acetate = 5:1).

**<sup>1</sup>H NMR** (400 MHz, CDCl<sub>3</sub>): δ 5.63 (dt, *J* = 15.5, 6.9 Hz, 1H), 5.51 – 5.41 (m, 1H), 3.63 (t, *J* = 6.4 Hz, 2H), 2.53 (q, *J* = 6.9 Hz, 1H), 2.28 (p, *J* = 6.6 Hz, 2H), 2.24 – 2.11 (m, 2H), 1.17 (d, *J* = 6.9 Hz, 3H), 1.06 (d, *J* = 4.9 Hz, 21H).

**<sup>13</sup>C NMR** (100 MHz, CDCl<sub>3</sub>): δ 131.4, 128.3, 113.4, 80.4, 62.0, 40.21 36.2, 27.5, 21.1, 18.8, 11.4.

**HRMS** (ESI) *m/z*: Calcd. for C<sub>18</sub>H<sub>34</sub>OSi [M+Na]<sup>+</sup> : 317.2277, found 317.2277.

**FTIR** (neat): 3335, 2941, 2891, 2864, 1463, 1045, 968, 883, 675, 661 cm<sup>-1</sup>.

**[α]<sub>D</sub><sup>26</sup>** +13.0 (*c* 0.5, CHCl<sub>3</sub>).

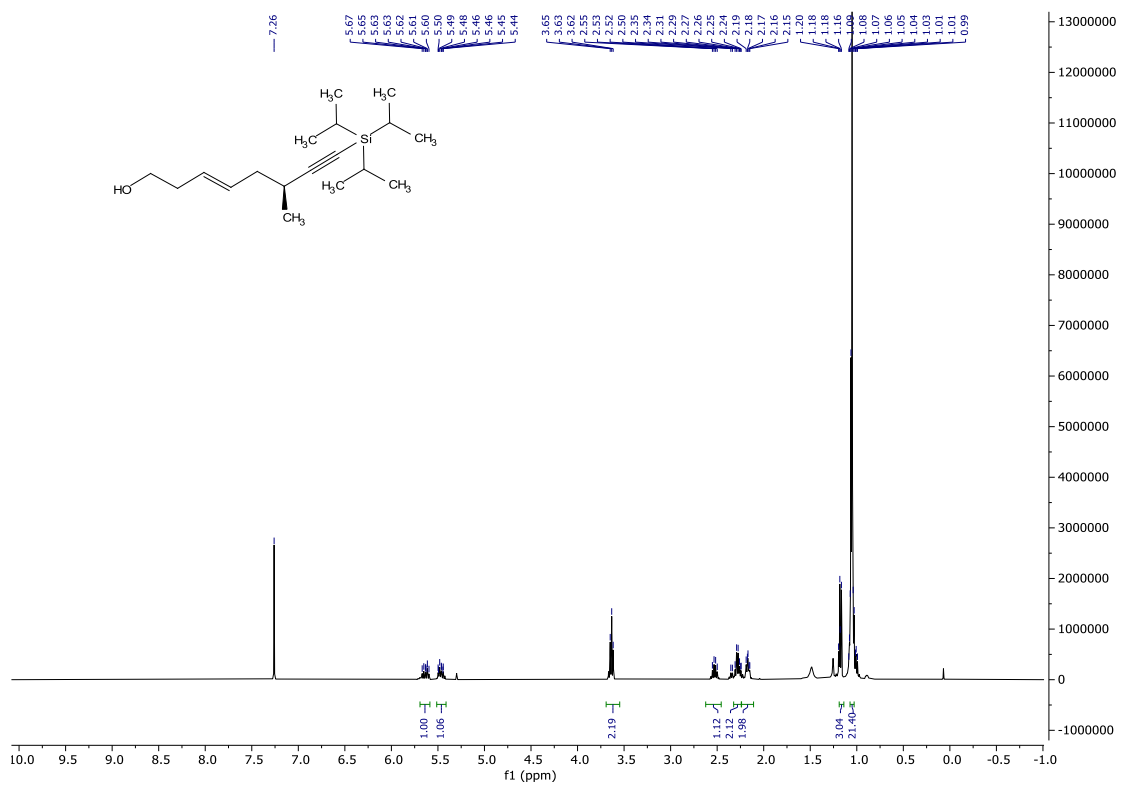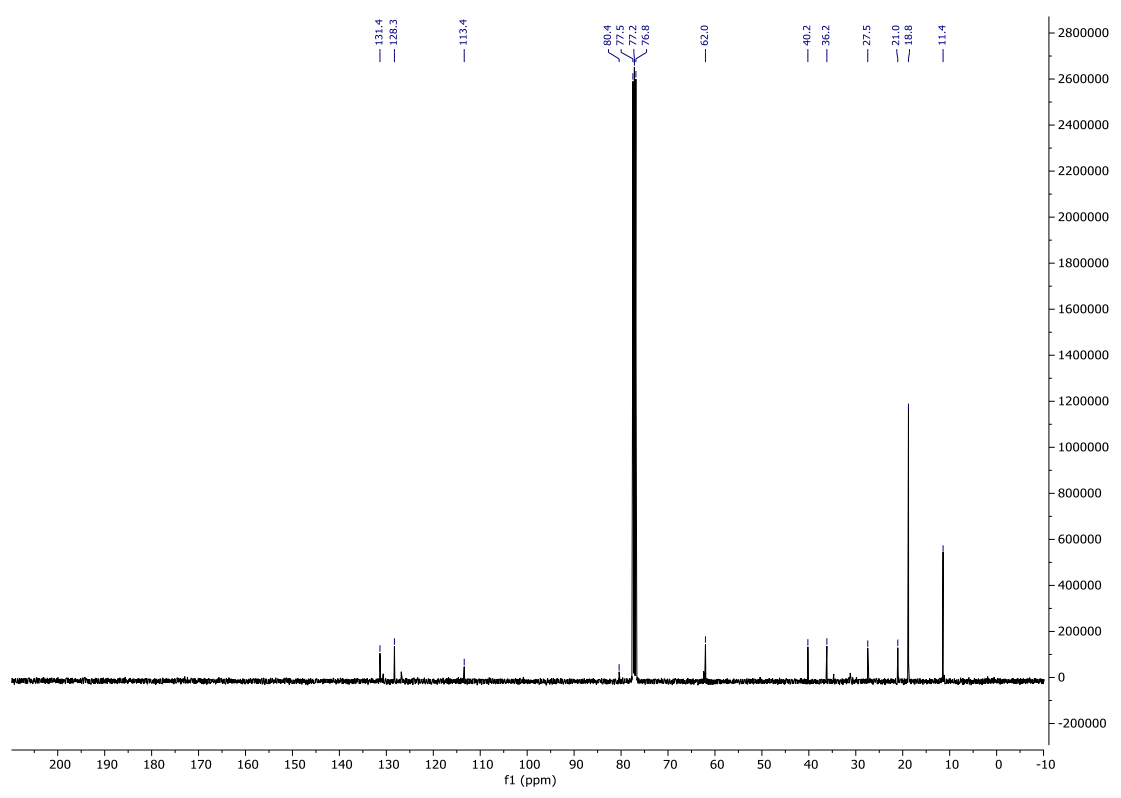

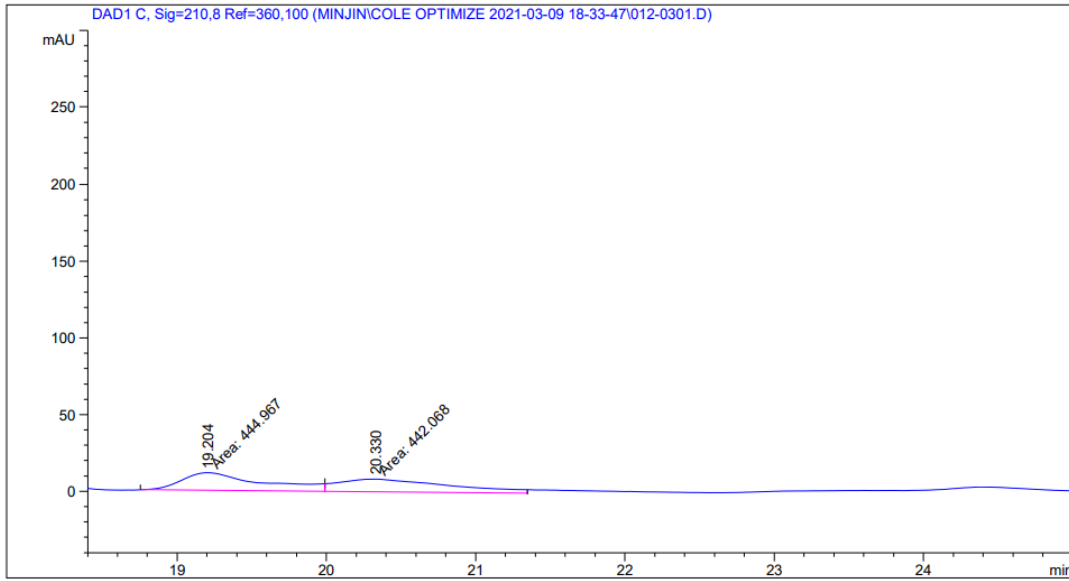

| Peak # | RetTime [min] | Type | Width [min] | Area [mAU*s] | Height [mAU] | Area %  |
|--------|---------------|------|-------------|--------------|--------------|---------|
| 1      | 19.204        | MF   | 0.6399      | 444.96750    | 11.58880     | 50.1634 |
| 2      | 20.330        | FM   | 0.8747      | 442.06824    | 8.42277      | 49.8366 |

Totals : 887.03574 20.01156

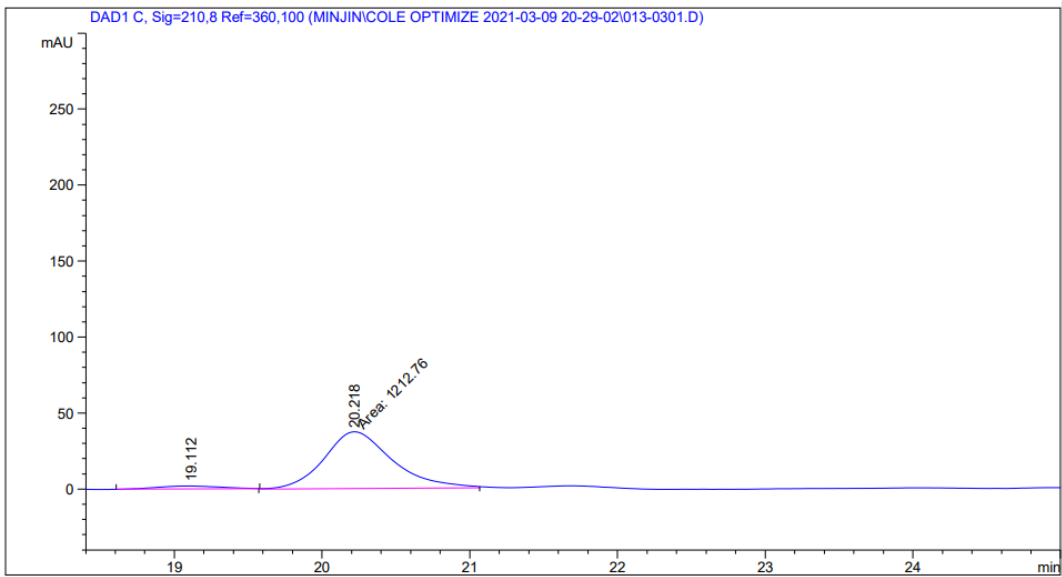

| Peak # | RetTime [min] | Type | Width [min] | Area [mAU*s] | Height [mAU] | Area %  |
|--------|---------------|------|-------------|--------------|--------------|---------|
| 1      | 19.112        | BV   | 0.3664      | 60.23192     | 1.98292      | 4.7315  |
| 2      | 20.218        | MM   | 0.5393      | 1212.76416   | 37.48124     | 95.2685 |

Totals : 1272.99608 39.46416

***tert*-Butyldimethyl[*((3S,4S)*-4-methylhex-5-en-3-yl)oxy]silane (Fragment E)**

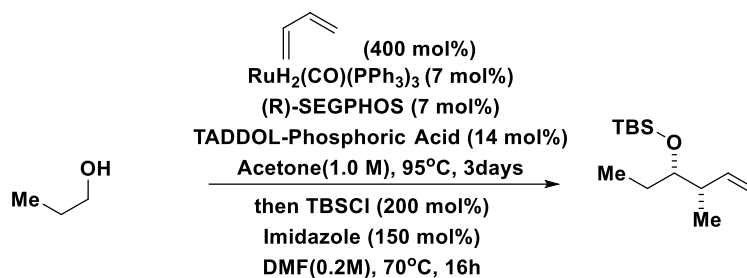

To a resealable pressure tube equipped with a magnetic stir devise under an argon atmosphere charged with  $\text{RuH}_2(\text{CO})(\text{PPh}_3)_3$  (78 mg, 0.084 mmol, 7 mol%), (R)-SEGPHOS (51 mg, 0.084 mmol, 7 mol%), TADDOL-phosphoric acid (117 mg, 0.17 mmol, 14 mol%) was added propanol (90  $\mu\text{L}$ , 1.20 mmol, 100 mol%) and acetone (1.2 mL). The reaction mixture was allowed to cool to -78 °C. Butadiene (0.42 mL, 4.8 mmol, 400 mol%) was quickly added and the reaction vessel was quickly capped. The reaction mixture was placed in an oil bath at 95 °C for 3 days. The reaction mixture was allowed to cool to ambient temperature. TBSCl (181 mg, 1.20 mmol, 200 mol%) and imidazole (204 mg, 3.0 mmol, 105 mol%) were added and the reaction mixture was diluted with DMF (6 mL). The reaction resulting mixture was allowed to stir at 70 °C for an additional 15 hr. A saturated solution of  $\text{CuSO}_4$  aq was added and the reaction mixture was transferred to a separatory funnel. The phases were separated, and the aqueous phase extracted with ether (20 mL  $\times$  3). The combined organic layers were dried ( $\text{Na}_2\text{SO}_4$ ), filtered and concentrated *in vacuo*. The residue was subjected to flash column chromatography ( $\text{SiO}_2$ ; hexanes) to furnish the **Fragment E** (161.7 mg, 0.71 mmol, syn:anti = 4.7:1, 98% *ee*) as a colorless oil in 59% yield.

**TLC** ( $\text{SiO}_2$ ):  $R_f$  = 0.63 (hexanes).

**$^1\text{H NMR}$**  (400 MHz,  $\text{CDCl}_3$ ):  $\delta$  5.83 (ddd,  $J$  = 17.5, 10.4, 7.3 Hz, 1H), 5.05 – 4.95 (m, 2H), 3.46 (d,  $J$  = 5.5 Hz, 1H), 2.31 (dddd,  $J$  = 6.9, 5.4, 4.1, 1.2 Hz, 1H), 1.49 – 1.37 (m, 2H), 0.96 (d,  $J$  = 6.8 Hz, 3H), 0.90 (s, 9H), 0.86 (t,  $J$  = 7.4 Hz, 3H), 0.04 (s, 6H).

**$^{13}\text{C NMR}$**  (100 MHz,  $\text{CDCl}_3$ ):  $\delta$  141.9, 113.8, 77.4, 42.5, 26.7, 26.1, 26.1, 15.2, 9.6, -4.2, -4.3.

**HRMS** (ESI)  $m/z$ : Calcd. for  $\text{C}_{13}\text{H}_{28}\text{OSi}$   $[\text{M}-\text{H}]^+$  : 227.1831, found 227.1832

**FTIR** (neat): 2959, 2929, 1462, 1252, 1005, 884, 772  $\text{cm}^{-1}$ .

**$[\alpha]^{26}_{\text{D}}$** : -21.0 ( $c$  1.0,  $\text{CH}_2\text{Cl}_2$ ). Lit (**ent-Fragment E**).<sup>5</sup>  **$[\alpha]^{25}_{\text{D}}$** : +20.6 ( $c$  1.1,  $\text{CH}_2\text{Cl}_2$ ).





## Cross metathesis product

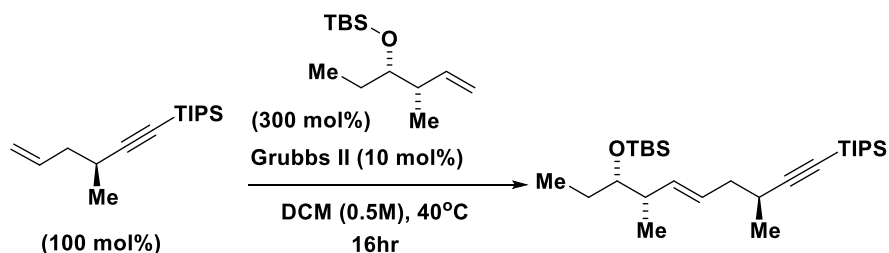

To a round-bottomed flask equipped with a magnetic stirring device under an argon atmosphere charged with second generation Grubbs catalyst (8.5 mg, 0.01 mmol, 10 mol%) was added CH<sub>2</sub>Cl<sub>2</sub> (0.20 mL, 0.5 M). **Fragment F** (25.1 mg, 0.1 mmol, 100 mol%) and **Fragment E** (68.6 mg, 0.3 mmol, 300 mol%) were added. The reaction mixture was allowed to stir at 40 °C for 18 hr. The reaction was allowed to reach ambient temperature and was concentrated *in vacuo*. The resultant residue was subjected to flash chromatography (SiO<sub>2</sub>: hexanes) to furnish the title compound (20.3 mg, 0.045 mmol) as a colorless oil in 71% yield.

**TLC** (SiO<sub>2</sub>): R<sub>f</sub> = 0.6 (hexanes).

**<sup>1</sup>H NMR** (500 MHz, CDCl<sub>3</sub>): δ 5.54 – 5.41 (m, 2H), 3.42 (q, *J* = 5.5 Hz, 1H), 2.49 (h, *J* = 6.9 Hz, 1H), 2.31 – 2.22 (m, 1H), 2.21 – 2.09 (m, 2H), 1.43 (dtd, *J* = 13.1, 7.3, 2.9 Hz, 2H), 1.15 (d, *J* = 6.9 Hz, 3H), 1.08 – 1.01 (m, 21H), 0.94 (d, *J* = 6.8 Hz, 3H), 0.89 (s, 9H), 0.85 (t, *J* = 7.4 Hz, 3H), 0.03 (s, 6H).

**<sup>13</sup>C NMR** (126 MHz, CDCl<sub>3</sub>): δ 135.4, 126.8, 113.7, 79.8, 41.3, 40.2, 27.3, 26.6, 26.0, 20.8, 18.6, 18.2, 15.8, 11.3, 9.3, -4.3, -4.4.

**HRMS** (ESI) *m/z*: [M+Na]<sup>+</sup> calcd for C<sub>27</sub>H<sub>54</sub>NaOSi<sub>2</sub> 473.3605, found 473.3613.

**FTIR** (neat): 2929, 2865, 2162, 1461, 1253, 1015, 834, 772, 663 cm<sup>-1</sup>.

[α]<sub>D</sub><sup>26</sup>: -5.0 (*c* 0.1, CHCl<sub>3</sub>).

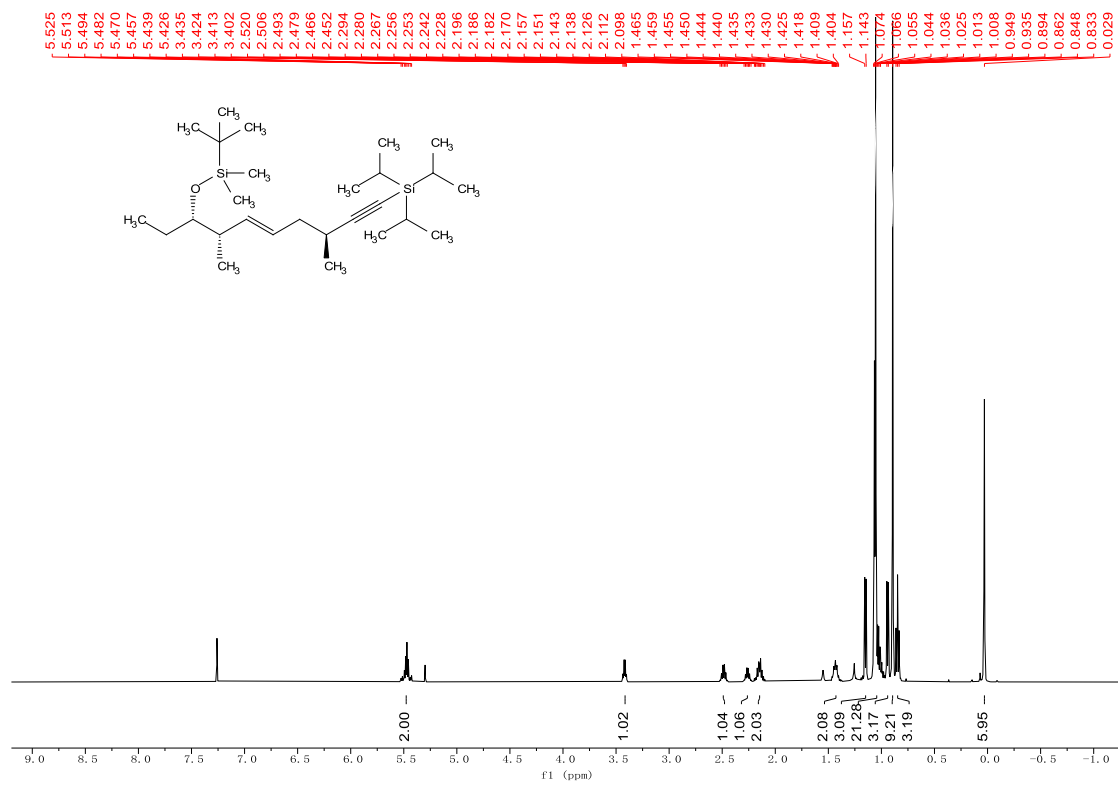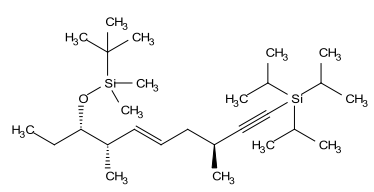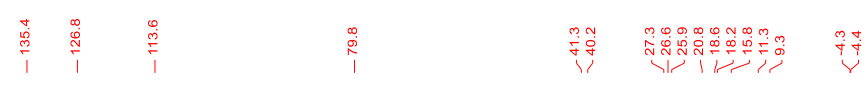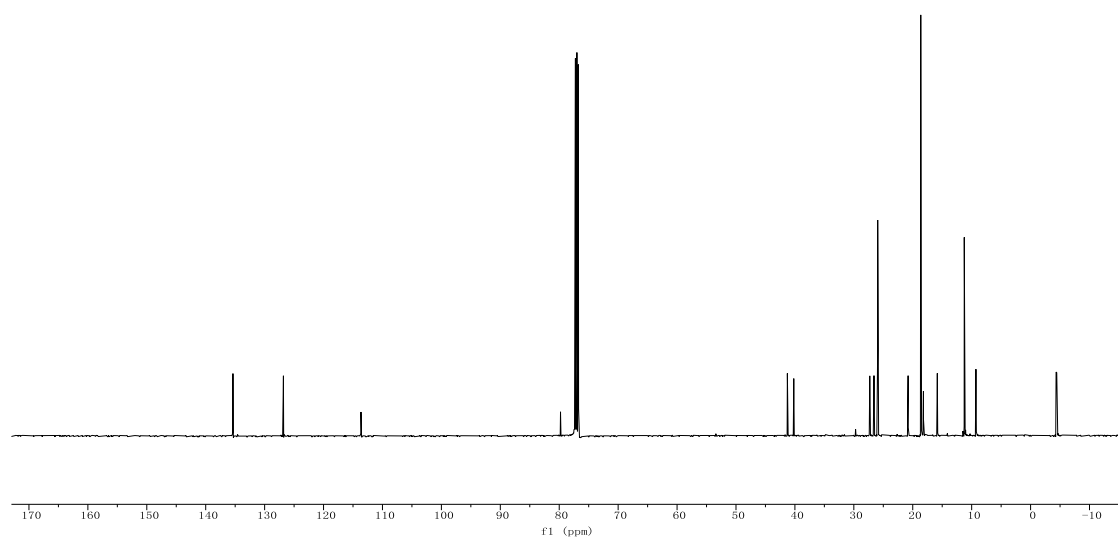

**(E)-(3S,4S,8S)-4,8-Dimethyldec-5-en-9-yn-3-ol (14)**

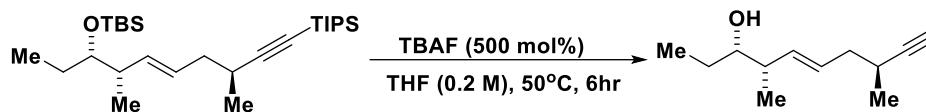

To a solution of silyl protected compound (28mg, 62  $\mu\text{mol}$ , 100 mol%) in dry THF (0.3 mL, 0.2 M) was added TBAF (1.0 M in THF, 0.31 mL, 500 mol%) at 0 °C. The reaction mixture was allowed to stir at 50 °C for 6 hr.  $\text{NH}_4\text{Cl}$  aq was added and the biphasic mixture was transferred to a separatory funnel. The aqueous phase was extracted with ethyl acetate. The combined organic layers were dried ( $\text{Na}_2\text{SO}_4$ ), filtered and concentrated *in vacuo*. The resulting oil was subjected to flash chromatography ( $\text{SiO}_2$ : 9:1 hexanes:ethyl acetate) to furnish the title compound **14** (8.9 mg, 50  $\mu\text{mol}$ ) in 80% yield as a colorless oil.

**TLC** ( $\text{SiO}_2$ ):  $R_f$  = 0.22 (hexanes/ethyl acetate = 9:1).

**$^1\text{H}$  NMR** (400 MHz,  $\text{CDCl}_3$ ):  $\delta$  5.59 – 5.42 (m, 2H), 3.39 (dt,  $J$  = 8.8, 4.5 Hz, 1H), 2.57 – 2.45 (m, 1H), 2.29 (td,  $J$  = 7.0, 5.0 Hz, 1H), 2.24 – 2.13 (m, 2H), 2.10 – 2.04 (m, 1H), 1.55 – 1.46 (m, 2H), 1.20 – 1.17 (m, 3H), 1.01 (d,  $J$  = 6.8 Hz, 3H), 0.96 (t,  $J$  = 7.4 Hz, 3H).

**$^{13}\text{C}$  NMR** (100 MHz,  $\text{CDCl}_3$ ):  $\delta$  135.5, 128.2, 88.8, 76.4, 68.9, 42.1, 39.9, 26.9, 26.3, 20.6, 14.4, 10.6.

**HRMS** (ESI) Calcd. for  $\text{C}_{12}\text{H}_{20}\text{O}$   $[\text{M}+\text{Na}]^+$  : 203.1412, found 203.1410.

**FTIR** (neat): 3308, 2967, 2931, 2875, 1455, 1328, 1097, 970, 748, 694  $\text{cm}^{-1}$ .

**$[\alpha]_D^{26}$** : +6.0 ( $c$  1.0,  $\text{CHCl}_3$ ).

The spectral data were identical to those reported.<sup>6</sup>

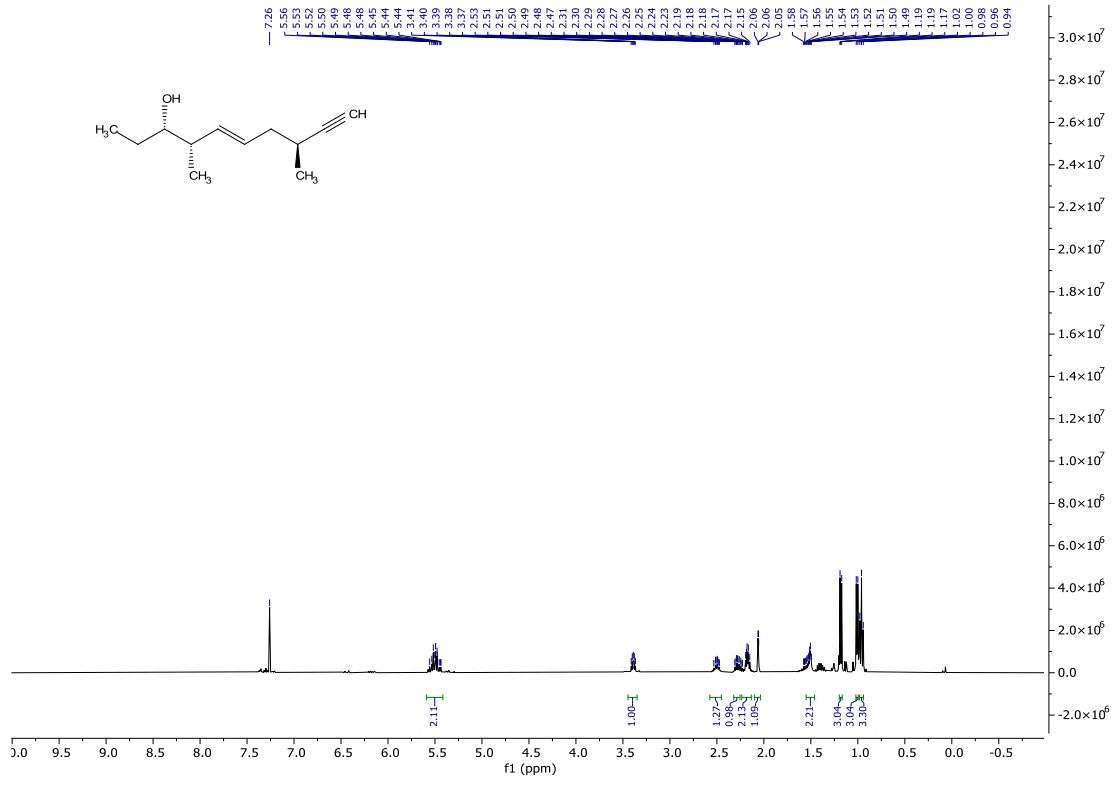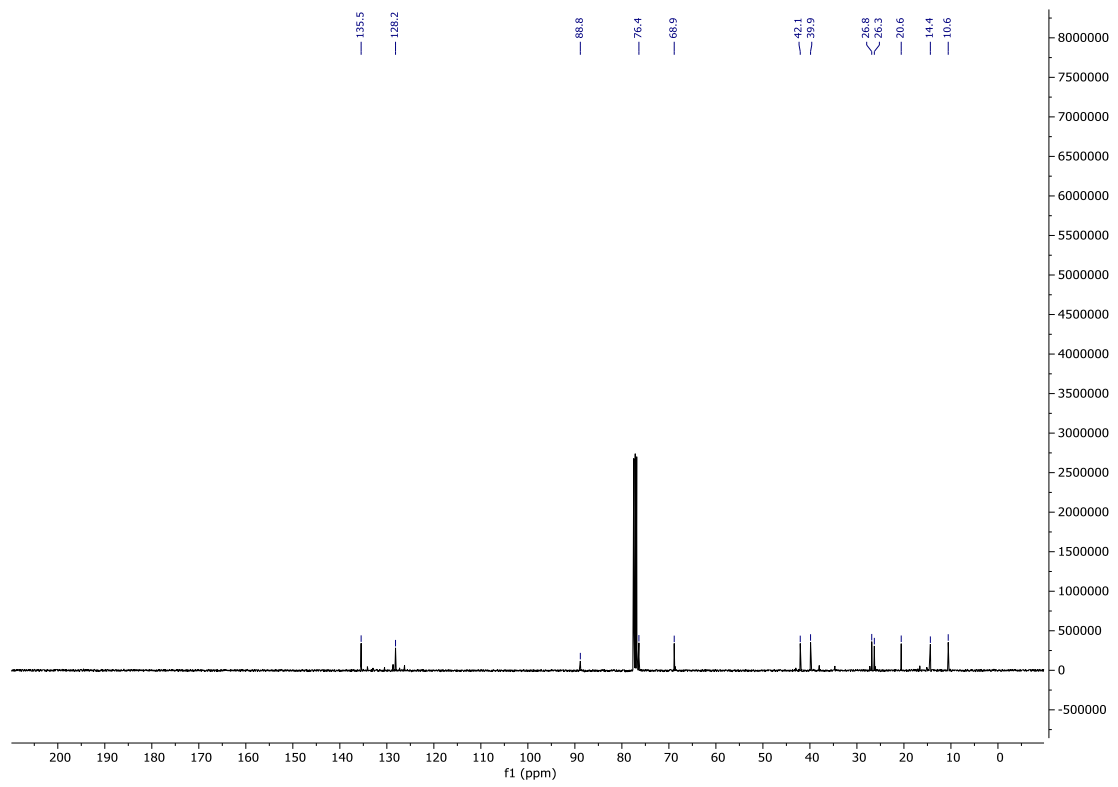

## Product of Shi epoxidation

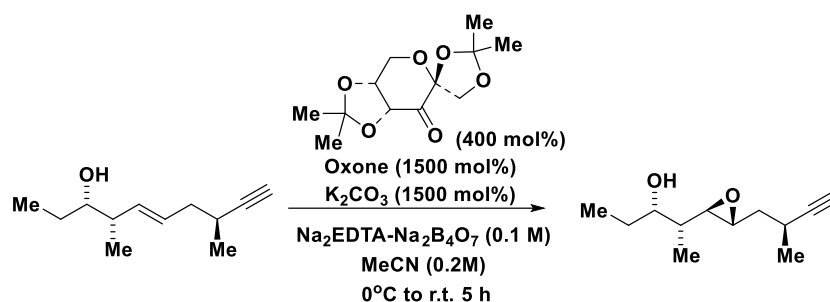

To a solution of **14** (20 mg, 0.12 mmol, 100 mol%) in MeCN (0.56 mL, 0.2 M) and 0.28 mL of 0.4 mM Na<sub>2</sub>EDTA-0.05 M Na<sub>2</sub>B<sub>4</sub>O<sub>7</sub> solution was added 1,2:4,5-di-O-isopropylidene-D-erythro-2,3-hexodiure-2,6-pyranose (Shi's catalyst, 114 mg, 0.48 mmol, 400 mol%). The reaction mixture was allowed to cool to 0 °C and a mixture of oxone® (510 mg, 1.8 mmol, 1500 mol%) and K<sub>2</sub>CO<sub>3</sub> (230 mg, 1.8 mmol, 1500 mol%) were added in several portions over 4 hr. The reaction mixture was allowed to stir at room temperature for 1 hr. Water was added and the biphasic mixture was transferred to a separatory funnel. The aqueous phase was extracted with ethyl acetate. The combined organic layers were dried (Na<sub>2</sub>SO<sub>4</sub>), filtered and concentrated *in vacuo*. The resulting oil was subjected to flash chromatography (SiO<sub>2</sub>: 5:1 hexanes:ethyl acetate) to furnish the title compound (24.4 mg, 0.043 mmol) in 72 % yield as a colorless oil.

**TLC** (SiO<sub>2</sub>): R<sub>f</sub> = 0.25 (hexanes/ethyl acetate = 4:1).

**<sup>1</sup>H NMR** (400 MHz, CDCl<sub>3</sub>): δ 3.63 (td, *J* = 6.6, 3.5 Hz, 1H), 2.97 (td, *J* = 5.9, 2.3 Hz, 1H), 2.79 (dd, *J* = 7.2, 2.3 Hz, 1H), 2.67 (d, *J* = 6.5 Hz, 1H), 2.10 (d, *J* = 2.4 Hz, 1H), 1.68 – 1.63 (m, 2H), 1.56 – 1.49 (m, 3H), 1.25 (d, *J* = 6.9 Hz, 3H), 1.02 – 0.95 (m, 6H).

**<sup>13</sup>C NMR** (100 MHz, CDCl<sub>3</sub>): δ 77.4, 74.7, 69.4, 61.9, 56.3, 40.3, 39.6, 27.4, 23.7, 21.5, 10.7, 10.5.

**HRMS** (ESI) Calcd. for C<sub>12</sub>H<sub>20</sub>O<sub>2</sub> [M+Na]<sup>+</sup>: 219.1361, found 219.1353.

**FTIR** (neat): 2963, 2922, 1452, 1376, 1220, 1066, 967, 862, 717, 682, 663, 656 cm<sup>-1</sup>.

**[α]<sub>D</sub><sup>26</sup>**: +2.5 (*c* 1.0, CHCl<sub>3</sub>).

The spectral data were identical to those reported.<sup>6</sup>

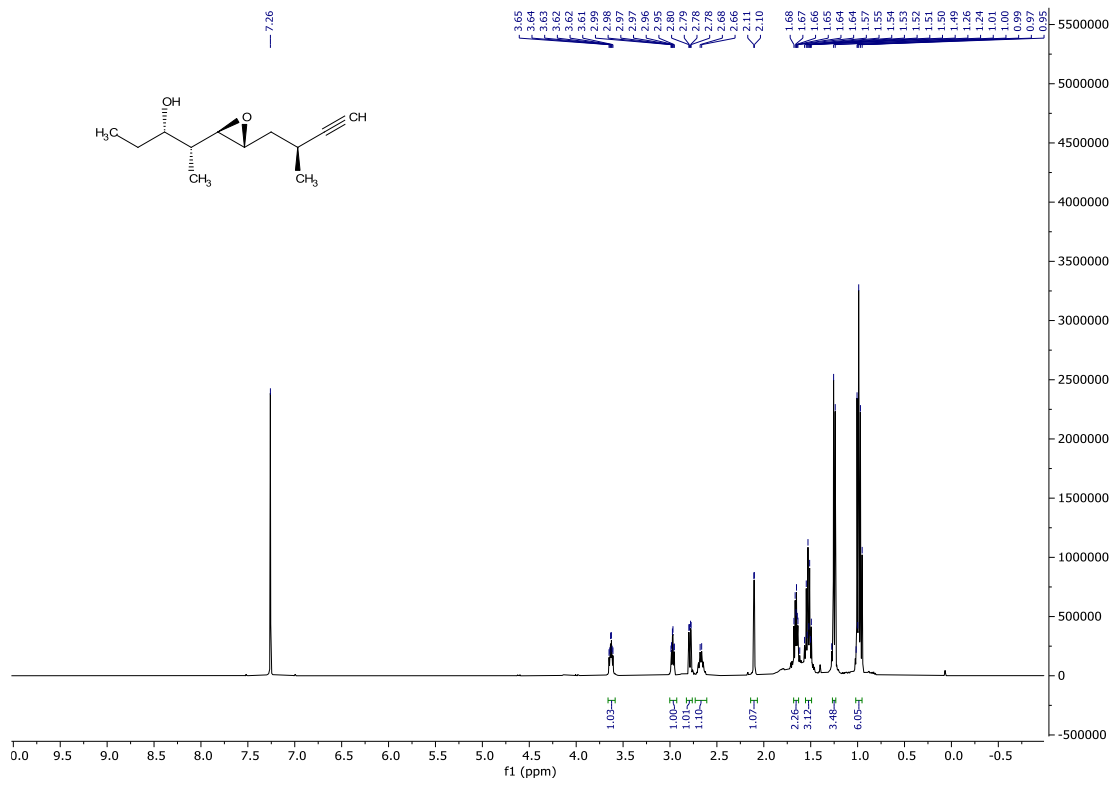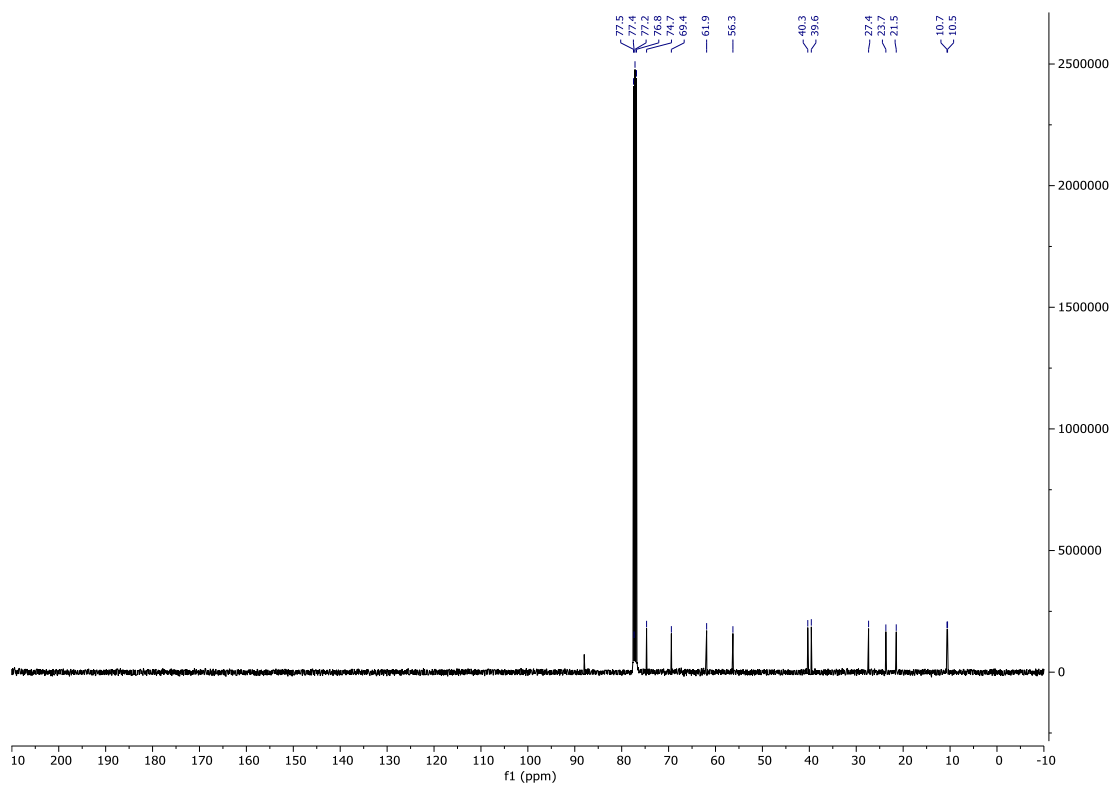

## Fragment B

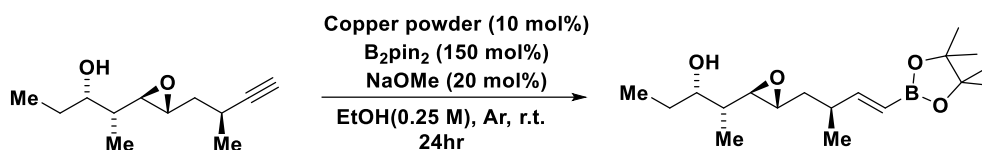

To a stirred solution of alkyne (15.2 mg, 72  $\mu$ mol, 100 mol%) in ethanol (0.3 mL, 0.25 M) was added copper powder (0.5 mg, 7.2  $\mu$ mol, 10 mol%), B<sub>2</sub>pin<sub>2</sub> (28 mg, 108  $\mu$ mol, 150 mol%), and sodium methylate (0.8 mg, 14.4  $\mu$ mol, 20 mol%). The reaction mixture was allowed to stir at room temperature for 24 hr. The reaction mixture was concentrated *in vacuo* and the resultant residue was subjected to flash column chromatography (SiO<sub>2</sub>: 5:1 hexanes/ethyl acetate) to furnish the **Fragment B** (14.8 mg, 45  $\mu$ mol) in 60% yield as a colorless oil.

**TLC** (SiO<sub>2</sub>): R<sub>f</sub> = 0.15 (hexanes/ethyl acetate = 4:1).

**<sup>1</sup>H NMR** (400 MHz, CDCl<sub>3</sub>):  $\delta$  6.54 (dd, *J* = 18.0, 7.3 Hz, 1H), 5.46 (dd, *J* = 18.0, 1.2 Hz, 1H), 3.62 – 3.56 (m, 1H), 2.77 (td, *J* = 6.0, 2.3 Hz, 1H), 2.66 (dd, *J* = 7.3, 2.3 Hz, 1H), 2.50 – 2.42 (m, 1H), 1.64 – 1.59 (m, 1H), 1.55 – 1.46 (m, 4H), 1.26 (s, 12H), 1.07 (d, *J* = 6.8 Hz, 3H), 0.96 (dd, *J* = 7.2, 4.7 Hz, 6H).

**<sup>13</sup>C NMR** (100 MHz, CDCl<sub>3</sub>):  $\delta$  158.3, 83.3, 77.4, 74.8, 62.1, 56.9, 40.4, 39.0, 37.7, 27.4, 24.9, 20.3, 10.7, 10.7.

**HRMS** (ESI) Calcd. for C<sub>18</sub>H<sub>33</sub>BO<sub>4</sub> [M+Na]<sup>+</sup>: 347.2370, found 347.2361.

**FTIR** (neat): 2974, 2928, 1637, 1363, 1323, 1143, 969, 849, 657 cm<sup>-1</sup>.

**[ $\alpha$ ]<sup>26</sup><sub>D</sub>**: +16.0 (*c* 1.0, CHCl<sub>3</sub>).





## Pladienolide B

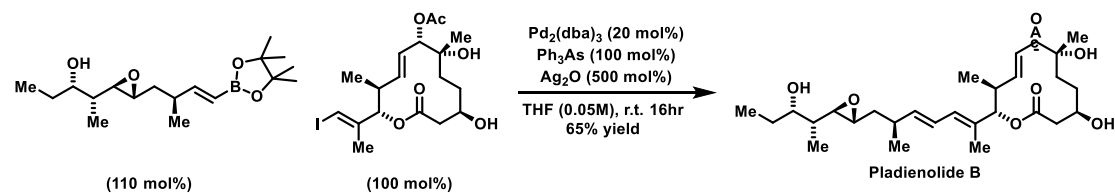

To a solution of **Fragment A** (7.3 mg, 15.6  $\mu\text{mol}$ , 100 mol%) in THF (0.3 mL, 0.05 M) at room temperature was added **Fragment B** (5.5 mg, 17  $\mu\text{mol}$ , 110 mol%), silver oxide (18.1 mg, 78  $\mu\text{mol}$ , 500 mol%), triphenylarsine (4.8 mg, 15.6  $\mu\text{mol}$ , 100 mol%) and tris(dibenzylideneacetone)dipalladium(0) (2.9 mg, 3.1  $\mu\text{mol}$ , 20 mol%). The reaction mixture was allowed to stir at room temperature for 16 hr. The reaction mixture was filtered through celite, washed with  $\text{CH}_2\text{Cl}_2$ , and concentrated *in vacuo*. The resulting oil was subjected to flash chromatography ( $\text{SiO}_2$ : 1:1 – 3:7 hexanes/ethyl acetate) to furnish **Pladienolide B** (5.5 mg, 10  $\mu\text{mol}$ ) as a colorless oil in 65% yield.

**TLC** ( $\text{SiO}_2$ ):  $R_f$  = 0.12 (hexanes/ethyl acetate = 3:7).

**$^1\text{H NMR}$**  (400 MHz,  $\text{CD}_3\text{OD}$ ):  $\delta$  6.33 (dd,  $J$  = 15.0, 10.8 Hz, 1H), 6.14 – 6.07 (m, 1H), 5.75 – 5.68 (m, 1H), 5.68 – 5.62 (m, 1H), 5.56 (dd,  $J$  = 15.2, 9.7 Hz, 1H), 5.05 (d,  $J$  = 10.0 Hz, 2H), 3.78 (dt,  $J$  = 6.4, 3.6 Hz, 1H), 3.51 (dt,  $J$  = 8.8, 4.6 Hz, 1H), 2.72 (td,  $J$  = 5.9, 2.3 Hz, 1H), 2.66 (dd,  $J$  = 8.2, 2.3 Hz, 1H), 2.58 (dd,  $J$  = 10.3, 6.6 Hz, 1H), 2.52 (d,  $J$  = 3.9 Hz, 2H), 2.51 – 2.41 (m, 1H), 2.06 (s, 3H), 1.75 (d,  $J$  = 1.3 Hz, 3H), 1.64 (td,  $J$  = 9.6, 8.2, 4.0 Hz, 2H), 1.60 – 1.55 (m, 1H), 1.55 – 1.50 (m, 1H), 1.46 (dt,  $J$  = 14.0, 5.1 Hz, 2H), 1.42 – 1.34 (m, 2H), 1.29 (s, 1H), 1.19 (s, 3H), 1.08 (d,  $J$  = 6.7 Hz, 3H), 0.95 (d,  $J$  = 7.3 Hz, 3H), 0.93 – 0.89 (m, 3H), 0.88 (d,  $J$  = 6.7 Hz, 3H).

**$^{13}\text{C NMR}$**  (100 MHz,  $\text{CD}_3\text{OD}$ ):  $\delta$  172.2, 171.8, 142.4, 141.7, 132.5, 132.2, 127.1, 125.9, 84.3, 80.3, 75.3, 74.1, 70.4, 63.0, 58.5, 42.8, 41.8, 40.7, 40.1, 37.5, 36.7, 30.5, 28.6, 24.2, 21.7, 21.1, 16.9, 11.9, 10.9, 10.8.

**HRMS** (ESI) Calcd. for  $\text{C}_{30}\text{H}_{48}\text{O}_8$  [ $\text{M}+\text{Na}$ ] $^+$  : 559.3247, found 559.3243.

**FTIR** (neat): 3435, 2961, 2929, 2874, 1734, 1557, 1456, 1370, 1238, 1175, 1020, 966, 910  $\text{cm}^{-1}$ .

$[\alpha]_{\text{D}}^{26}$ : +7.5 ( $c$  0.5, MeOH). Lit.<sup>7</sup>  $[\alpha]_{\text{D}}^{27}$ : +7.90 ( $c$  1.1, MeOH).

The spectral data were identical to those reported.<sup>3,6,7</sup>

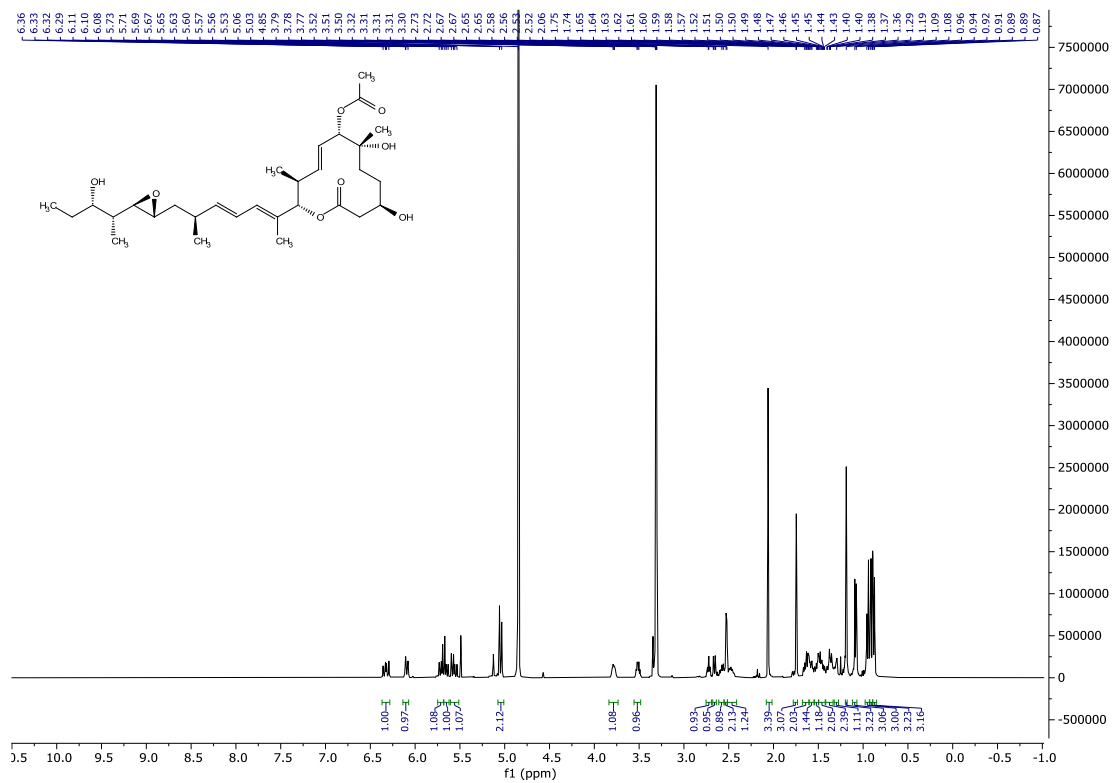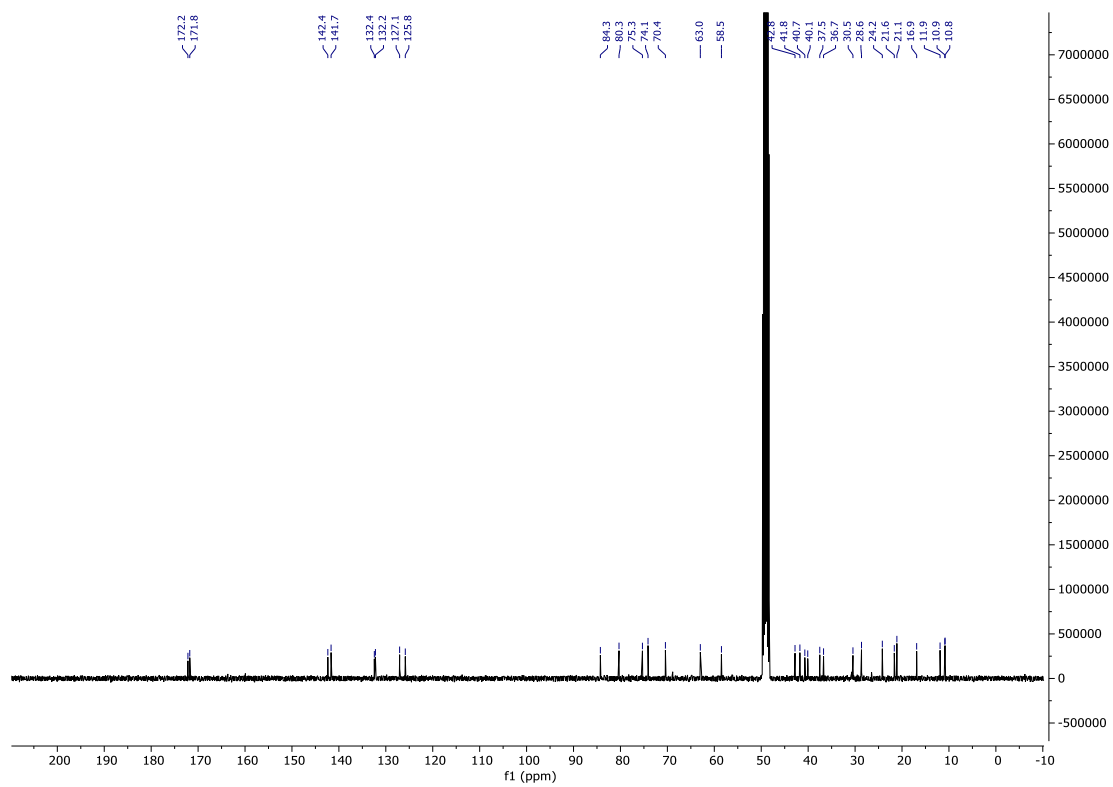

**<sup>13</sup>C NMR of Synthetic Pladienolide B (by Krische)**  
**Comparison with Natural Compound (by Sakai)<sup>8</sup> and Synthetic Pladienolide B (by Kotake)<sup>7</sup>**

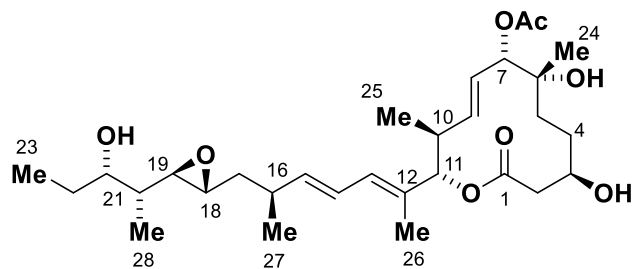

| Carbon #            | Natural | Synthetic (by Kotake) | Synthetic (by Krische) |
|---------------------|---------|-----------------------|------------------------|
| 1                   | 171.8   | 171.8                 | 171.8                  |
| 2                   | 40.1    | 40.1                  | 40.1                   |
| 3                   | 70.4    | 70.4                  | 70.4                   |
| 4                   | 30.5    | 30.4                  | 30.5                   |
| 5                   | 37.5    | 37.5                  | 37.5                   |
| 6                   | 74.1    | 74.1                  | 74.1                   |
| 7                   | 80.3    | 80.3                  | 80.3                   |
| 8                   | 127.1   | 127.0                 | 127.1                  |
| 9                   | 141.7   | 141.6                 | 141.7                  |
| 10                  | 41.8    | 41.7                  | 41.8                   |
| 11                  | 84.3    | 84.3                  | 84.3                   |
| 12                  | 132.2   | 132.2                 | 132.2                  |
| 13                  | 132.4   | 132.4                 | 132.5                  |
| 14                  | 125.8   | 125.8                 | 125.9                  |
| 15                  | 142.4   | 132.3                 | 142.4                  |
| 16                  | 36.7    | 36.7                  | 36.7                   |
| 17                  | 40.7    | 40.7                  | 40.7                   |
| 18                  | 58.4    | 58.5                  | 58.5                   |
| 19                  | 63.0    | 63.0                  | 63.0                   |
| 20                  | 42.8    | 42.8                  | 42.8                   |
| 21                  | 75.3    | 75.3                  | 75.3                   |
| 22                  | 28.6    | 28.6                  | 28.6                   |
| 23                  | 10.8    | 10.8                  | 10.8                   |
| 24                  | 24.2    | 24.2                  | 24.2                   |
| 25                  | 16.9    | 16.9                  | 16.9                   |
| 26                  | 11.9    | 11.9                  | 11.9                   |
| 27                  | 21.6    | 21.7                  | 21.7                   |
| 28                  | 10.9    | 10.9                  | 10.9                   |
| 7-COCH <sub>3</sub> | 172.2   | 172.2                 | 172.2                  |
|                     | 21.1    | 21.1                  | 21.1                   |

## Single Crystal Diffraction Data for Compound 4

|                                   |                                                                                                              |
|-----------------------------------|--------------------------------------------------------------------------------------------------------------|
| Empirical formula                 | C16 H28 O6                                                                                                   |
| Formula weight                    | 316.38                                                                                                       |
| Temperature                       | 100 K                                                                                                        |
| Wavelength                        | 1.54184 Å                                                                                                    |
| Crystal system                    | monoclinic                                                                                                   |
| Space group                       | P 1 21 1                                                                                                     |
| Unit cell dimensions              | a = 10.16343(18) Å      a = 90°.<br>b = 6.7312(2) Å      b = 91.4769(16)°.<br>c = 13.4561(3) Å      g = 90°. |
| Volume                            | 920.24(4) Å <sup>3</sup>                                                                                     |
| Z                                 | 2                                                                                                            |
| Density (calculated)              | 1.142 Mg/m <sup>3</sup>                                                                                      |
| Absorption coefficient            | 0.713 mm <sup>-1</sup>                                                                                       |
| F(000)                            | 344                                                                                                          |
| Crystal size                      | 0.37 x 0.093 x 0.081 mm <sup>3</sup>                                                                         |
| Theta range for data collection   | 3.285 to 73.376°.                                                                                            |
| Index ranges                      | -12<=h<=12, -7<=k<=8, -16<=l<=16                                                                             |
| Reflections collected             | 12472                                                                                                        |
| Independent reflections           | 3452 [R(int) = 0.0368]                                                                                       |
| Completeness to theta = 67.684°   | 100.0 %                                                                                                      |
| Absorption correction             | Numerical and multi-scan                                                                                     |
| Max. and min. transmission        | 1.00 and 0.714                                                                                               |
| Refinement method                 | Full-matrix least-squares on F <sup>2</sup>                                                                  |
| Data / restraints / parameters    | 3452 / 1 / 214                                                                                               |
| Goodness-of-fit on F <sup>2</sup> | 1.045                                                                                                        |
| Final R indices [I>2sigma(I)]     | R1 = 0.0396, wR2 = 0.1062                                                                                    |
| R indices (all data)              | R1 = 0.0400, wR2 = 0.1067                                                                                    |
| Absolute structure parameter      | -0.06(12)                                                                                                    |
| Extinction coefficient            | n/a                                                                                                          |
| Largest diff. peak and hole       | 0.190 and -0.237 e.Å <sup>-3</sup>                                                                           |

View of 4 showing the atom labeling scheme.

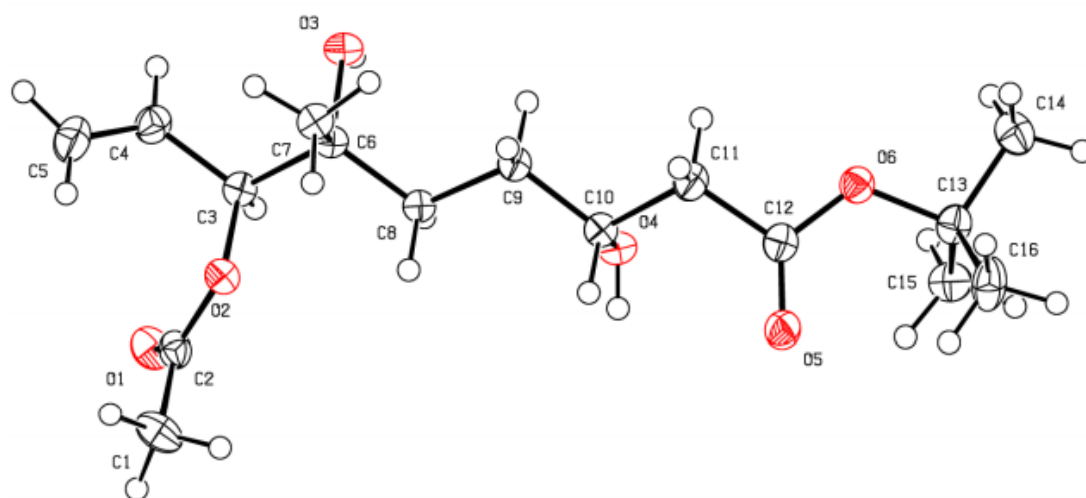

## **REFERENCES**

- [1] R. Billa, A. L. Mandel, B. D. Jones, J. J. La Clair, M. D. Burkart, *Org. Lett.* **2012**, *14*, 5396-5399.
- [2] W. Lölsberg, S. Werle, J. M. Neudörfl, H. G. Schmalz, *Org. Lett.* **2012**, *14*, 5996-5999.
- [3] A. K. Ghosh, D. D. Anderson, *Org. Lett.* **2012**, *14*, 4730-4733.
- [4] G. A. Brito, F. Della-Felice, G. Luo, A. S. Burns, R. A. Pilli, S. D. Rychnovsky, M. J. Krische, *Org. Lett.* **2018**, *13*, 4144-4147.
- [5] X. Gao, S. K. Woo, M. J. Krische, *J. Am. Chem. Soc.* **2013**, *135*, 4223-4226.
- [6] V. P. Kumar, S. Chandrasekhar, *Org. Lett.* **2013**, *15*, 3610-3613.
- [7] R. M. Kanada, D. Itoh, M. Nagai, J. Nijima, N. Asai, Y. Mizui, S. Abe, Y. Kotake, *Angew. Chem. Int. Ed.* **2007**, *46*, 4350-4355.
- [8] T. Sakai, N. Asai, A. Okuda, N. Kawamura, Y. Mizui, *J. Antibiot. Res.* **2004**, *57*, 180-187.
